# Supplementary material
Source: PubMed Central journal article supplement (PMC4200317)
Supplement: tableS1.pdf [file tableS1.pdf]

| <b>Gene Symbol</b>  | <b>ImChief<br/>Expression<br/>Level</b> | <b>ImSPEM<br/>Expression<br/>Level</b> | <b>Fold<br/>change</b> |
|---------------------|-----------------------------------------|----------------------------------------|------------------------|
| Ppbp                | 5.91                                    | 13.85                                  | 244.85                 |
| Krt5                | 6.81                                    | 13.80                                  | 127.20                 |
| Mal2                | 5.85                                    | 12.68                                  | 113.25                 |
| Krt6a               | 6.61                                    | 13.17                                  | 94.35                  |
| Trim29              | 6.60                                    | 13.07                                  | 89.06                  |
| Cldn4               | 7.28                                    | 13.48                                  | 73.53                  |
| Dsg3                | 5.81                                    | 11.99                                  | 72.20                  |
| Spink5              | 6.18                                    | 12.32                                  | 70.83                  |
| Rab25               | 6.76                                    | 12.77                                  | 64.46                  |
| Vsnl1               | 6.79                                    | 12.77                                  | 63.39                  |
| Krt14               | 7.57                                    | 13.50                                  | 61.07                  |
| Krt17               | 7.60                                    | 13.53                                  | 60.73                  |
| Tacstd2             | 6.68                                    | 12.58                                  | 59.53                  |
| Serpinb5            | 5.84                                    | 11.70                                  | 57.83                  |
| Il1a                | 5.29                                    | 11.13                                  | 57.20                  |
| Xist                | 5.87                                    | 11.71                                  | 57.18                  |
| Dsp                 | 6.64                                    | 12.47                                  | 57.00                  |
| Cdh1                | 6.76                                    | 12.44                                  | 51.21                  |
| Cdh3                | 6.67                                    | 12.26                                  | 48.17                  |
| Trex2               | 6.81                                    | 12.32                                  | 45.36                  |
| Mpzl2               | 6.47                                    | 11.97                                  | 45.34                  |
| Plet1               | 7.35                                    | 12.85                                  | 45.01                  |
| Rab15               | 6.46                                    | 11.89                                  | 43.22                  |
| Clic3               | 7.01                                    | 12.41                                  | 42.06                  |
| Gpx2                | 6.53                                    | 11.90                                  | 41.43                  |
| S100a14             | 6.58                                    | 11.93                                  | 40.85                  |
| Nipal2              | 5.60                                    | 10.91                                  | 39.73                  |
| Tspan6              | 6.37                                    | 11.67                                  | 39.54                  |
| Krt6b               | 6.11                                    | 11.31                                  | 36.67                  |
| Cwh43               | 6.42                                    | 11.55                                  | 35.20                  |
| Krt15               | 7.13                                    | 12.25                                  | 34.85                  |
| Krt7                | 8.19                                    | 13.28                                  | 34.09                  |
| Gabrp               | 6.46                                    | 11.55                                  | 34.05                  |
| Ehf                 | 6.55                                    | 11.57                                  | 32.46                  |
| Wfdc2/He4           | 7.01                                    | 12.01                                  | 31.89                  |
| Vnn1                | 7.37                                    | 12.35                                  | 31.54                  |
| Esrp1               | 5.90                                    | 10.86                                  | 31.13                  |
| Tmc4                | 7.14                                    | 12.07                                  | 30.57                  |
| Gsta4               | 8.35                                    | 13.27                                  | 30.25                  |
| Lass3               | 6.04                                    | 10.91                                  | 29.17                  |
| Cxcl5               | 6.02                                    | 10.87                                  | 28.77                  |
| Serinc2             | 7.97                                    | 12.79                                  | 28.19                  |
| Tns4                | 6.70                                    | 11.47                                  | 27.41                  |
| Ap1m2               | 6.19                                    | 10.95                                  | 27.05                  |
| Irf6                | 6.54                                    | 11.28                                  | 26.83                  |
| Elf3                | 6.38                                    | 11.10                                  | 26.40                  |
| Sncg                | 7.57                                    | 12.29                                  | 26.33                  |
| Fgfbp1              | 6.43                                    | 11.15                                  | 26.25                  |
| Tmprss11e           | 5.81                                    | 10.51                                  | 26.09                  |
| Pstpip2 F830208F22R |                                         |                                        |                        |
| ik                  | 5.71                                    | 10.38                                  | 25.43                  |
| Spr3                | 6.20                                    | 10.84                                  | 24.84                  |

|               |      |       |       |
|---------------|------|-------|-------|
| Sorbs2        | 6.74 | 11.36 | 24.66 |
| Tmprss11bnl   | 5.80 | 10.40 | 24.36 |
| Lad1          | 6.93 | 11.52 | 24.16 |
| Ankrd22       | 6.26 | 10.84 | 24.02 |
| Pdzk1ip1      | 7.19 | 11.74 | 23.53 |
| Mall          | 6.93 | 11.44 | 22.80 |
| Pof1b         | 5.33 | 9.82  | 22.56 |
| Ripk4         | 6.57 | 11.06 | 22.48 |
| Kcnk1         | 7.02 | 11.46 | 21.81 |
| Gm10786       | 5.49 | 9.93  | 21.67 |
| Slc6a14       | 5.40 | 9.84  | 21.62 |
| Sprr2d        | 6.77 | 11.20 | 21.59 |
| Gpr87         | 6.32 | 10.74 | 21.44 |
| Itgb6         | 5.72 | 10.14 | 21.44 |
| Elovl6        | 7.08 | 11.47 | 20.88 |
| Epcam         | 5.95 | 10.33 | 20.87 |
| Sprr2j-ps     | 5.83 | 10.21 | 20.85 |
| Pkp1          | 7.48 | 11.86 | 20.79 |
| Psap1         | 7.11 | 11.48 | 20.69 |
| Has2          | 6.92 | 11.27 | 20.29 |
| Palmd         | 7.53 | 11.86 | 20.01 |
| Vtcn1         | 6.50 | 10.82 | 20.01 |
| Prss27        | 7.71 | 12.03 | 19.98 |
| Spint2        | 7.23 | 11.54 | 19.88 |
| Sprr1b        | 7.86 | 12.16 | 19.70 |
| Sfn           | 7.82 | 12.12 | 19.65 |
| Hsd17b7       | 7.72 | 12.00 | 19.39 |
| 9930023K05Rik | 5.68 | 9.95  | 19.26 |
| Lypd3         | 7.30 | 11.53 | 18.88 |
| Prkch         | 6.44 | 10.68 | 18.84 |
| Ildr1         | 6.82 | 11.05 | 18.74 |
| Thbs1         | 9.23 | 13.45 | 18.62 |
| Ccnd2         | 9.04 | 13.25 | 18.57 |
| Spint1        | 8.25 | 12.45 | 18.39 |
| Ptprf         | 7.30 | 11.50 | 18.37 |
| Mal           | 7.78 | 11.94 | 17.88 |
| 9530008L14Rik | 5.89 | 10.05 | 17.77 |
| 2310002L13Rik | 7.05 | 11.19 | 17.65 |
| Macc1         | 5.42 | 9.56  | 17.56 |
| Hmgcl1        | 5.48 | 9.62  | 17.54 |
| Pitx1         | 7.67 | 11.78 | 17.34 |
| Plagl1        | 7.33 | 11.42 | 17.04 |
| Tmprss13      | 6.56 | 10.63 | 16.81 |
| Slc12a2       | 7.81 | 11.86 | 16.55 |
| Defb14        | 5.20 | 9.20  | 16.06 |
| Plcg2         | 6.70 | 10.70 | 15.96 |
| 5730469M10Rik | 7.30 | 11.27 | 15.70 |
| Il17re        | 6.96 | 10.93 | 15.68 |
| Ltf           | 8.51 | 12.47 | 15.58 |
| Perp          | 8.94 | 12.90 | 15.51 |
| Ly6d          | 9.36 | 13.31 | 15.48 |
| Ocln          | 5.93 | 9.88  | 15.41 |
| Nt5e          | 6.28 | 10.22 | 15.33 |
| Rnf144b       | 7.47 | 11.40 | 15.16 |
| 2310007B03Rik | 6.63 | 10.55 | 15.12 |

|                   |      |       |       |
|-------------------|------|-------|-------|
| Sh3bgrl2          | 7.32 | 11.24 | 15.10 |
| Cdcp1             | 6.69 | 10.60 | 15.01 |
| Il24              | 6.28 | 10.14 | 14.50 |
| Sfn               | 7.82 | 11.68 | 14.48 |
| Fxyd3 Lgi4        | 7.64 | 11.50 | 14.47 |
| Lamc2             | 6.86 | 10.71 | 14.39 |
| Cln3 LOC100047702 |      |       |       |
| LOC100048243      | 7.30 | 11.13 | 14.19 |
| AU042651          | 7.45 | 11.26 | 14.05 |
| 1190003J15Rik     | 7.12 | 10.92 | 13.89 |
| Acpp              | 6.36 | 10.12 | 13.56 |
| 2310043J07Rik     | 6.72 | 10.47 | 13.51 |
| 4833423E24Rik     | 6.04 | 9.80  | 13.49 |
| Cdh13             | 6.79 | 10.53 | 13.34 |
| Tmem54            | 6.90 | 10.62 | 13.23 |
| Fam83b            | 5.82 | 9.54  | 13.17 |
| Parp8             | 6.88 | 10.58 | 12.97 |
| Sostdc1           | 6.21 | 9.91  | 12.93 |
| Bcar3             | 6.83 | 10.51 | 12.81 |
| Tmem40            | 7.00 | 10.67 | 12.77 |
| Rassf9            | 5.32 | 8.99  | 12.75 |
| Bdh1              | 6.60 | 10.27 | 12.74 |
| Nuak1             | 7.47 | 11.13 | 12.70 |
| Tmc7              | 6.62 | 10.28 | 12.66 |
| Serpinb10         | 8.18 | 11.84 | 12.65 |
| Tmem102 G630025P  |      |       |       |
| 09Rik             | 6.48 | 10.13 | 12.51 |
| Clca5             | 6.00 | 9.64  | 12.47 |
| Tnip3             | 6.58 | 10.20 | 12.35 |
| Slc1a1            | 6.23 | 9.85  | 12.29 |
| Pi15              | 5.70 | 9.32  | 12.28 |
| Tspan1            | 6.01 | 9.61  | 12.07 |
| Slc25a43          | 7.37 | 10.95 | 11.95 |
| Fbxo36            | 8.74 | 12.31 | 11.92 |
| Ly6g6c            | 7.27 | 10.84 | 11.92 |
| Fermt1            | 6.10 | 9.66  | 11.82 |
| Prss8             | 6.66 | 10.21 | 11.69 |
| Slc46a1           | 7.07 | 10.61 | 11.66 |
| Sox9              | 8.25 | 11.78 | 11.59 |
| Rac3              | 7.71 | 11.24 | 11.57 |
| Esrp2             | 7.60 | 11.12 | 11.47 |
| Niacr1            | 6.14 | 9.65  | 11.40 |
| Adam8             | 7.86 | 11.37 | 11.39 |
| Muc15             | 5.80 | 9.31  | 11.36 |
| Tfrc              | 6.65 | 10.14 | 11.23 |
| Grb7              | 6.88 | 10.36 | 11.11 |
| Sox11             | 6.14 | 9.60  | 11.06 |
| Muc1              | 7.10 | 10.55 | 10.96 |
| Wnt7b             | 6.56 | 10.01 | 10.91 |
| Epb4.1l4a         | 6.21 | 9.66  | 10.90 |
| Galnt3            | 6.61 | 10.05 | 10.84 |
| Lgals3            | 8.53 | 11.97 | 10.81 |
| Atp8b1            | 6.11 | 9.54  | 10.81 |
| Sorl1             | 6.94 | 10.37 | 10.75 |
| Cadm1             | 6.94 | 10.37 | 10.73 |

|                    |      |       |       |
|--------------------|------|-------|-------|
| Tcfap2a            | 6.38 | 9.79  | 10.69 |
| 1810019J16Rik      | 6.63 | 10.04 | 10.62 |
| Clip4              | 7.01 | 10.41 | 10.60 |
| Cblc               | 6.80 | 10.20 | 10.58 |
| Eps8l2 B230206H07R |      |       |       |
| ik                 | 7.40 | 10.80 | 10.56 |
| Epha1              | 6.48 | 9.88  | 10.55 |
| Tnfrsf22           | 7.73 | 11.11 | 10.43 |
| Col17a1            | 7.16 | 10.54 | 10.40 |
| Kdm5b              | 6.79 | 10.16 | 10.34 |
| Sulf1              | 6.55 | 9.91  | 10.24 |
| Lsr                | 7.19 | 10.54 | 10.19 |
| Plscr2             | 7.75 | 11.09 | 10.14 |
| AA986860           | 6.67 | 10.00 | 10.07 |
| Capsl              | 5.54 | 8.87  | 10.06 |
| Marveld3           | 6.41 | 9.74  | 10.05 |
| Etl4               | 6.58 | 9.90  | 10.01 |
| Mgat4a             | 5.54 | 8.86  | 9.99  |
| Mpzl3              | 6.62 | 9.91  | 9.79  |
| Dcbld1             | 6.70 | 9.99  | 9.78  |
| Snrpn Snurf        | 5.98 | 9.26  | 9.70  |
| Foxa1              | 7.19 | 10.46 | 9.66  |
| Dhcr24             | 9.45 | 12.71 | 9.61  |
| Pglyrp1            | 7.45 | 10.71 | 9.60  |
| Ak3l1              | 7.08 | 10.34 | 9.57  |
| Pdzrn3             | 6.64 | 9.89  | 9.54  |
| Glipr1 Krr1        | 6.54 | 9.78  | 9.49  |
| Casq2              | 5.73 | 8.96  | 9.42  |
|                    | 6.04 | 9.27  | 9.38  |
| 1810011O10Rik      | 6.32 | 9.55  | 9.35  |
| Sort1              | 8.08 | 11.31 | 9.35  |
| Sult2b1            | 6.60 | 9.82  | 9.30  |
| Obfc2a             | 7.81 | 11.01 | 9.18  |
| Serpinb9           | 9.60 | 12.78 | 9.09  |
| BC037703           | 6.26 | 9.44  | 9.09  |
| Plekha1            | 7.14 | 10.31 | 9.01  |
| Grhl2              | 6.20 | 9.36  | 8.97  |
| Fam60a             | 8.53 | 11.68 | 8.92  |
| Ptprz1             | 5.32 | 8.47  | 8.91  |
| Dsg2               | 6.09 | 9.24  | 8.87  |
| Tiam1              | 6.96 | 10.10 | 8.82  |
| Hook1              | 5.89 | 9.02  | 8.79  |
| Abca12             | 6.16 | 9.29  | 8.73  |
| Cxcl16 Zmynd15     | 8.37 | 11.48 | 8.68  |
| Atxn1              | 6.52 | 9.63  | 8.65  |
| Lamb3              | 7.18 | 10.29 | 8.63  |
| Gpr56              | 7.25 | 10.36 | 8.59  |
| Col8a1             | 7.28 | 10.38 | 8.58  |
| Aldh3b2            | 6.68 | 9.78  | 8.57  |
| Cpm                | 5.93 | 9.02  | 8.52  |
| Wnt7a              | 6.62 | 9.71  | 8.51  |
| Ppp2r2c            | 7.41 | 10.50 | 8.51  |
| Mrgprb2            | 5.31 | 8.39  | 8.46  |
| Trp63              | 7.15 | 10.22 | 8.38  |
| Srd5a1             | 8.56 | 11.62 | 8.36  |

|                   |       |       |      |
|-------------------|-------|-------|------|
| Elovl4            | 6.92  | 9.98  | 8.35 |
| Kcnj15            | 8.65  | 11.71 | 8.32 |
| P2ry2             | 7.11  | 10.17 | 8.30 |
| Mboat2            | 7.37  | 10.42 | 8.29 |
| Mctp1             | 5.52  | 8.57  | 8.25 |
| Fam60a            | 8.47  | 11.51 | 8.25 |
| Hoxc6             | 6.33  | 9.37  | 8.22 |
| Klk1b11           | 6.59  | 9.62  | 8.21 |
| Trim13            | 7.69  | 10.72 | 8.15 |
| Runx1             | 8.74  | 11.76 | 8.09 |
| Tmem171           | 7.54  | 10.55 | 8.04 |
| Il18r1            | 5.64  | 8.63  | 7.98 |
| Ston2             | 6.92  | 9.91  | 7.94 |
| Hnf1b             | 6.28  | 9.26  | 7.90 |
| Krt13             | 7.10  | 10.08 | 7.87 |
| Sema4d            | 6.63  | 9.60  | 7.85 |
| Spns2             | 7.65  | 10.61 | 7.82 |
| Gsto1             | 10.81 | 13.77 | 7.79 |
| Plek2             | 6.27  | 9.23  | 7.77 |
| Il13ra1           | 6.08  | 9.03  | 7.71 |
| Prss22            | 7.09  | 10.03 | 7.67 |
| Tgm1              | 7.14  | 10.08 | 7.64 |
| Fam188a           | 9.01  | 11.93 | 7.57 |
| Dpyd              | 5.82  | 8.74  | 7.57 |
| Pbx1              | 8.05  | 10.96 | 7.55 |
| Ifi202b           | 4.94  | 7.85  | 7.53 |
| Rin2              | 7.79  | 10.70 | 7.51 |
| Clca4             | 6.62  | 9.52  | 7.49 |
| Gpr115            | 5.34  | 8.23  | 7.45 |
| Ankk1             | 6.35  | 9.24  | 7.41 |
| Elovl7            | 7.00  | 9.89  | 7.40 |
| Lphn2 LOC10004805 |       |       |      |
| 0                 | 7.53  | 10.41 | 7.39 |
| Sox2              | 6.29  | 9.17  | 7.36 |
| Osbpl3            | 8.74  | 11.62 | 7.35 |
| Fst Thrap3        | 9.67  | 12.53 | 7.26 |
| Def6              | 7.25  | 10.10 | 7.21 |
| Atp2b4            | 7.02  | 9.87  | 7.21 |
| Psca              | 10.47 | 13.32 | 7.19 |
| Bnk               | 6.48  | 9.32  | 7.18 |
| Wnt10a            | 8.15  | 10.99 | 7.15 |
| Cyp51             | 7.37  | 10.20 | 7.15 |
| Edn1              | 7.19  | 10.02 | 7.11 |
| Sc4mol            | 9.36  | 12.17 | 7.05 |
| Cish              | 7.21  | 10.02 | 6.98 |
| Myo5b             | 6.63  | 9.43  | 6.97 |
| Ptpn13            | 8.01  | 10.81 | 6.95 |
| Pcdhb16           | 6.04  | 8.83  | 6.94 |
| Pawr              | 6.67  | 9.45  | 6.89 |
| Tmeff1            | 7.01  | 9.79  | 6.87 |
| Sh3rf2            | 7.83  | 10.61 | 6.84 |
| Itgb5             | 9.23  | 12.01 | 6.84 |
| Galnt7            | 7.02  | 9.79  | 6.81 |
| Bnip3             | 8.13  | 10.88 | 6.72 |
| Rdh10             | 8.11  | 10.85 | 6.67 |

|               |       |       |      |
|---------------|-------|-------|------|
| Gm3579        | 10.93 | 13.66 | 6.66 |
| Gm3579        | 10.93 | 13.66 | 6.66 |
| Nsdhl         | 8.96  | 11.69 | 6.64 |
| Marveld2      | 6.23  | 8.96  | 6.63 |
| Cpox          | 8.92  | 11.65 | 6.62 |
| Cxcl1         | 8.50  | 11.23 | 6.62 |
| Bst1          | 6.33  | 9.05  | 6.61 |
| Mapk13        | 7.46  | 10.17 | 6.58 |
| Duoxa1 Duoxa2 | 7.35  | 10.05 | 6.52 |
| Sqle          | 7.65  | 10.34 | 6.45 |
| Atp1b1        | 8.44  | 11.13 | 6.43 |
| Samd12        | 7.80  | 10.48 | 6.40 |
| Padi3         | 7.60  | 10.28 | 6.39 |
| Mxd1          | 8.60  | 11.28 | 6.38 |
| Ppp3ca        | 8.85  | 11.53 | 6.37 |
| A630095E13Rik | 5.57  | 8.24  | 6.37 |
| Pcdh1         | 6.40  | 9.07  | 6.35 |
| Tnnt2         | 8.70  | 11.36 | 6.34 |
| Tmem79        | 6.83  | 9.50  | 6.33 |
| Erb3          | 7.67  | 10.32 | 6.28 |
| Clu           | 9.54  | 12.19 | 6.27 |
| Tes           | 8.17  | 10.82 | 6.25 |
| Kifc3         | 8.19  | 10.83 | 6.24 |
| Lama3         | 6.73  | 9.37  | 6.21 |
| Kcnn4         | 7.92  | 10.56 | 6.20 |
| Inadl         | 6.66  | 9.28  | 6.18 |
| Defb3         | 6.40  | 9.02  | 6.16 |
| Reep6         | 9.36  | 11.97 | 6.12 |
| Aldh3a1       | 6.90  | 9.50  | 6.07 |
| Igsf9         | 6.96  | 9.56  | 6.04 |
| Met           | 8.77  | 11.36 | 6.01 |
| Rab17         | 8.14  | 10.72 | 6.00 |
| Rbms3         | 6.79  | 9.37  | 5.99 |
| Pvrl1         | 9.32  | 11.90 | 5.99 |
| Sdr42e1       | 5.98  | 8.55  | 5.97 |
| P2ry14        | 6.43  | 9.01  | 5.96 |
| 2610528J11Rik | 6.14  | 8.70  | 5.93 |
| Ube2f Gm5434  | 8.62  | 11.18 | 5.91 |
| AU018091      | 6.37  | 8.93  | 5.91 |
| Pglyrp3       | 6.60  | 9.16  | 5.89 |
| Prkar2b       | 7.11  | 9.66  | 5.85 |
| Atp10b        | 6.68  | 9.23  | 5.84 |
| Npnt          | 7.35  | 9.89  | 5.84 |
| Mctp2         | 5.43  | 7.98  | 5.84 |
| Hmgcs1        | 8.53  | 11.07 | 5.83 |
| Ttc12         | 6.78  | 9.33  | 5.82 |
| Phlda2        | 7.31  | 9.85  | 5.80 |
| Inhbb         | 6.96  | 9.50  | 5.80 |
| Exph5         | 5.81  | 8.33  | 5.75 |
| Cnksr1        | 6.96  | 9.48  | 5.74 |
| Tmem141       | 8.27  | 10.78 | 5.72 |
| Shroom3       | 7.32  | 9.83  | 5.68 |
| Pls3          | 10.10 | 12.60 | 5.66 |
| Copg2         | 9.02  | 11.52 | 5.66 |
| Aspa          | 5.19  | 7.69  | 5.65 |

|                    |       |       |      |
|--------------------|-------|-------|------|
| Tjp2               | 8.53  | 11.02 | 5.62 |
| Lphn2 LOC10004805  |       |       |      |
| 0                  | 5.84  | 8.33  | 5.61 |
| Pak6               | 6.80  | 9.29  | 5.58 |
| 1700001C19Rik AI66 |       |       |      |
| 1453               | 6.63  | 9.11  | 5.57 |
| Taf13              | 7.01  | 9.48  | 5.57 |
| Mill1              | 6.53  | 9.01  | 5.57 |
| Plekhh1            | 6.89  | 9.37  | 5.57 |
| Lrrc26             | 7.03  | 9.50  | 5.55 |
| AA467197 Mir147    | 7.39  | 9.85  | 5.51 |
| Dynlt3             | 8.52  | 10.97 | 5.49 |
| Syt8               | 7.34  | 9.79  | 5.48 |
| Prdx3              | 8.31  | 10.76 | 5.46 |
| Cd14               | 7.62  | 10.06 | 5.42 |
| Gramd2             | 6.53  | 8.97  | 5.40 |
| Elmo3              | 7.69  | 10.12 | 5.40 |
| Cbr2               | 10.48 | 12.91 | 5.40 |
| Itga3              | 9.20  | 11.63 | 5.40 |
| Capn5              | 7.88  | 10.31 | 5.40 |
| 2210411K11Rik      | 8.34  | 10.77 | 5.40 |
| Tcp1111            | 7.53  | 9.96  | 5.39 |
| Idi1               | 8.46  | 10.88 | 5.37 |
| Idi1               | 8.52  | 10.94 | 5.37 |
| Cpne8              | 7.08  | 9.51  | 5.36 |
| Fam83f             | 6.16  | 8.58  | 5.34 |
| Foxn1              | 6.70  | 9.12  | 5.33 |
| Lphn2 LOC10004805  |       |       |      |
| 0                  | 7.78  | 10.19 | 5.33 |
| Enpp1              | 7.11  | 9.52  | 5.29 |
| Tmem184a           | 7.46  | 9.87  | 5.29 |
| Pak1               | 7.47  | 9.87  | 5.28 |
| Prdx6              | 9.00  | 11.40 | 5.28 |
| Dera               | 8.33  | 10.72 | 5.27 |
| Ctsh               | 8.88  | 11.28 | 5.27 |
| Pgap2              | 8.98  | 11.37 | 5.26 |
| Klhl38             | 6.77  | 9.16  | 5.26 |
| Il18               | 6.22  | 8.61  | 5.26 |
| 9930032O22Rik      | 5.58  | 7.97  | 5.24 |
| Irs1               | 7.77  | 10.16 | 5.24 |
| Gramd3             | 7.46  | 9.84  | 5.23 |
| Efna1              | 8.21  | 10.60 | 5.23 |
| Epn3               | 7.80  | 10.19 | 5.22 |
| Aldoc              | 7.68  | 10.07 | 5.22 |
| Atp9a              | 6.95  | 9.33  | 5.20 |
| Cd9                | 9.60  | 11.96 | 5.13 |
| Arhgef16           | 7.11  | 9.47  | 5.12 |
| Polr3g             | 6.60  | 8.96  | 5.11 |
| Gyk                | 7.51  | 9.86  | 5.08 |
| Nupr1              | 9.03  | 11.37 | 5.07 |
| St14               | 9.71  | 12.04 | 5.06 |
| 2310030G06Rik      | 7.40  | 9.74  | 5.05 |
| Suc1g2             | 7.94  | 10.28 | 5.05 |
| Pcdhb17            | 5.35  | 7.69  | 5.05 |
| Galnt14            | 7.27  | 9.60  | 5.04 |

|                   |       |       |      |
|-------------------|-------|-------|------|
| Plekhg6           | 7.75  | 10.08 | 5.03 |
| Gm3579            | 9.04  | 11.36 | 5.01 |
| Fbxo32            | 7.42  | 9.74  | 5.00 |
| Bnip3             | 7.57  | 9.88  | 4.96 |
| Ube2q2            | 7.62  | 9.92  | 4.94 |
| Fat2              | 7.01  | 9.31  | 4.91 |
| Fgf1              | 6.68  | 8.97  | 4.90 |
| Pcdhb18           | 5.40  | 7.69  | 4.89 |
| Plxdc2            | 8.41  | 10.70 | 4.88 |
| Tbc1d9            | 7.39  | 9.68  | 4.88 |
| Rhou              | 8.72  | 11.01 | 4.88 |
| Paox              | 8.00  | 10.28 | 4.88 |
| Wbscr27           | 8.39  | 10.67 | 4.87 |
| Serpinb1b         | 5.59  | 7.87  | 4.87 |
| Acsl3 Utp14b      | 7.19  | 9.48  | 4.87 |
| Emp2              | 10.72 | 13.00 | 4.85 |
| Nfe2l3            | 6.92  | 9.20  | 4.84 |
| Robo1             | 7.61  | 9.88  | 4.82 |
| Mcam              | 9.40  | 11.67 | 4.82 |
| Lcn8              | 6.16  | 8.42  | 4.80 |
| Cnn3              | 9.62  | 11.88 | 4.80 |
| Ube2q2            | 7.59  | 9.85  | 4.80 |
| Mtap7             | 6.55  | 8.81  | 4.79 |
| Tnk1 Plscr3       | 7.05  | 9.30  | 4.77 |
| Gdpd5             | 8.79  | 11.05 | 4.76 |
| Ttc9              | 7.48  | 9.73  | 4.76 |
| Lipg              | 6.37  | 8.62  | 4.75 |
| Usp6nl            | 8.67  | 10.92 | 4.75 |
| Ankrd56           | 7.29  | 9.53  | 4.75 |
| Mafb              | 6.67  | 8.92  | 4.74 |
| Slc27a1           | 9.21  | 11.45 | 4.73 |
| Pyroxd1 Recql     | 7.34  | 9.58  | 4.73 |
| Rbm47             | 6.74  | 8.97  | 4.69 |
| Sgms1             | 7.15  | 9.38  | 4.69 |
| Prdm1             | 6.45  | 8.68  | 4.69 |
| Pik3ip1           | 8.27  | 10.50 | 4.67 |
| Ints4             | 8.70  | 10.92 | 4.66 |
| Cnn3              | 10.46 | 12.67 | 4.65 |
| Hs3st3b1          | 7.95  | 10.16 | 4.64 |
| Gm9359            | 6.69  | 8.90  | 4.63 |
| Sccpdh LOC1000448 |       |       |      |
| 96                | 6.88  | 9.09  | 4.62 |
| Serpinb6b         | 11.09 | 13.30 | 4.62 |
| Trpv4             | 8.66  | 10.87 | 4.61 |
| Epb4.1l5          | 7.82  | 10.03 | 4.61 |
| Crb3              | 7.08  | 9.28  | 4.60 |
| Nucb2             | 7.35  | 9.55  | 4.59 |
| Sprr2a1 Sprr2a3   | 10.53 | 12.73 | 4.58 |
| Sprr2a1 Sprr2a3   | 10.53 | 12.73 | 4.58 |
| Bcl2l15           | 5.36  | 7.55  | 4.57 |
| Phyhd1            | 8.96  | 11.14 | 4.54 |
| Fam59a            | 6.70  | 8.88  | 4.54 |
| Sh3d19            | 8.67  | 10.85 | 4.54 |
| Foxq1             | 7.11  | 9.28  | 4.50 |
| Enah              | 8.03  | 10.20 | 4.49 |



|                     |       |       |      |
|---------------------|-------|-------|------|
| Fam136a             | 6.51  | 8.67  | 4.48 |
| Kctd1               | 7.94  | 10.10 | 4.47 |
| Ramp3               | 6.87  | 9.02  | 4.46 |
| Syt17               | 7.60  | 9.75  | 4.45 |
| Suc1g2              | 7.78  | 9.93  | 4.44 |
| Spnb3               | 7.06  | 9.21  | 4.44 |
| Xrcc5               | 7.41  | 9.56  | 4.43 |
| Ssh3                | 7.26  | 9.41  | 4.42 |
| Hint3               | 7.61  | 9.75  | 4.41 |
| Arg1                | 6.29  | 8.43  | 4.41 |
| Nt5c2               | 8.24  | 10.38 | 4.41 |
| Igf1r               | 7.85  | 9.99  | 4.40 |
| Vdr                 | 7.60  | 9.73  | 4.39 |
| Ikzf2               | 7.21  | 9.34  | 4.39 |
| B4galnt3            | 7.07  | 9.20  | 4.38 |
| Pfkfb2              | 8.38  | 10.50 | 4.36 |
| Lpar5               | 7.50  | 9.63  | 4.36 |
| Dhx32               | 8.00  | 10.12 | 4.36 |
| Gadd45b             | 9.71  | 11.83 | 4.35 |
| Ctgf                | 11.04 | 13.16 | 4.35 |
| Il28ra              | 7.11  | 9.23  | 4.35 |
| Sh3yl1              | 7.03  | 9.14  | 4.32 |
| Eps8l1              | 6.50  | 8.60  | 4.30 |
| Slc16a13            | 7.53  | 9.64  | 4.30 |
| 5730559C18Rik       | 8.07  | 10.17 | 4.29 |
| Slc37a1             | 7.32  | 9.43  | 4.29 |
| Gfpt1               | 8.20  | 10.30 | 4.29 |
| Jag1                | 8.10  | 10.20 | 4.29 |
| 1700016C15Rik       | 5.97  | 8.06  | 4.28 |
| Dqx1                | 7.00  | 9.09  | 4.27 |
| Bcl2 D630008O14Rik  | 8.55  | 10.65 | 4.26 |
| Lpcat2              | 8.73  | 10.82 | 4.26 |
| Slc25a1             | 9.89  | 11.98 | 4.26 |
| 2010204K13Rik       | 6.90  | 8.99  | 4.25 |
| Arpc5               | 10.27 | 12.36 | 4.25 |
| Srgap3              | 7.56  | 9.64  | 4.25 |
| Hoxc5               | 6.26  | 8.35  | 4.24 |
| Aig1                | 7.25  | 9.33  | 4.24 |
| Gnai1               | 7.28  | 9.36  | 4.24 |
| Tcp11l2             | 6.53  | 8.61  | 4.22 |
| Fam3c               | 7.48  | 9.55  | 4.21 |
| 1110002B05Rik       | 6.89  | 8.97  | 4.21 |
| Maml3               | 6.72  | 8.79  | 4.20 |
| Inhba               | 9.04  | 11.11 | 4.20 |
| Stk17b              | 8.13  | 10.20 | 4.20 |
| Rassf6              | 5.49  | 7.55  | 4.19 |
| Herpud1             | 10.26 | 12.32 | 4.18 |
| 2010107G23Rik Chit1 | 7.61  | 9.67  | 4.18 |
| Vipr1               | 7.02  | 9.08  | 4.17 |
| Ptplb               | 8.23  | 10.29 | 4.15 |
| Ly6i                | 6.63  | 8.68  | 4.14 |
| Prkaa2              | 6.58  | 8.62  | 4.13 |
| Itgb4               | 8.93  | 10.97 | 4.12 |

|                   |       |       |      |
|-------------------|-------|-------|------|
| Atp2c2            | 6.78  | 8.82  | 4.11 |
| Antxr1            | 8.21  | 10.25 | 4.11 |
| Bzw2              | 8.97  | 11.01 | 4.11 |
| Ece1              | 9.12  | 11.16 | 4.11 |
| Fjx1              | 6.58  | 8.61  | 4.09 |
| Gnpda2            | 7.25  | 9.28  | 4.07 |
| Ivns1abp          | 8.80  | 10.83 | 4.07 |
| Zfp53             | 8.30  | 10.32 | 4.07 |
| Dhcr7             | 8.45  | 10.48 | 4.06 |
| Lrrc1             | 7.11  | 9.12  | 4.05 |
| Fam199x           | 7.40  | 9.41  | 4.04 |
| Rhov              | 7.02  | 9.03  | 4.04 |
| Hist1h2bc         | 10.22 | 12.24 | 4.03 |
| Slitrk6           | 5.23  | 7.24  | 4.03 |
| Osgin1            | 8.54  | 10.56 | 4.03 |
| Gcom1             | 7.21  | 9.22  | 4.02 |
| Stau2             | 8.14  | 10.14 | 4.02 |
| Zfp467            | 7.29  | 9.29  | 4.02 |
| Shroom4           | 6.79  | 8.79  | 4.01 |
| Lphn2 LOC10004805 |       |       |      |
| 0                 | 7.26  | 9.26  | 4.01 |
| Fgfr2             | 7.01  | 9.01  | 4.01 |
| Ccdc68            | 8.81  | 10.81 | 4.00 |
| Mpv17l            | 7.12  | 9.12  | 4.00 |
| Aktip Rbl2        | 8.68  | 10.68 | 3.99 |
| Cebpa             | 7.25  | 9.24  | 3.97 |
| Eya2              | 7.39  | 9.37  | 3.96 |
| Cdk6              | 8.56  | 10.55 | 3.96 |
| Cldnd1            | 11.29 | 13.27 | 3.94 |
| Fchsd2            | 7.19  | 9.17  | 3.93 |
| Ppp2r5c           | 7.99  | 9.96  | 3.91 |
| Lphn2             | 6.37  | 8.34  | 3.91 |
| Wdr47             | 7.63  | 9.60  | 3.91 |
| Gnai3             | 9.01  | 10.97 | 3.90 |
| 6330409N04Rik     | 8.24  | 10.20 | 3.89 |
| Plscr1            | 9.74  | 11.70 | 3.88 |
| Itga6             | 9.18  | 11.13 | 3.87 |
| Lpin3             | 7.11  | 9.06  | 3.87 |
|                   | 8.40  | 10.35 | 3.86 |
| Fam176a           | 6.81  | 8.76  | 3.86 |
| Srgap3            | 7.41  | 9.36  | 3.86 |
| Skap2             | 8.44  | 10.39 | 3.85 |
| Ube2w             | 6.37  | 8.32  | 3.85 |
| Wnt4              | 8.93  | 10.87 | 3.84 |
| Fam126b           | 7.73  | 9.67  | 3.84 |
| Bnc1              | 7.60  | 9.54  | 3.83 |
| Fam89a            | 7.81  | 9.75  | 3.83 |
| Eif4e3            | 7.15  | 9.09  | 3.83 |
| Thumpd3           | 8.28  | 10.22 | 3.83 |
| Gprc5a            | 10.61 | 12.54 | 3.82 |
| Hopx              | 7.38  | 9.32  | 3.82 |
| Zdhhc13           | 8.84  | 10.77 | 3.82 |
| Mfap3l            | 7.27  | 9.21  | 3.81 |
| Fabp5 Fabp5l2     | 9.11  | 11.04 | 3.81 |
| Slc4a4            | 8.22  | 10.15 | 3.81 |

|                 |      |       |      |
|-----------------|------|-------|------|
| Ldlr            | 9.18 | 11.10 | 3.80 |
| Mpp7            | 6.31 | 8.23  | 3.80 |
| Defb1           | 9.96 | 11.88 | 3.78 |
| Wwc1            | 6.99 | 8.91  | 3.78 |
| Susd4           | 6.47 | 8.39  | 3.78 |
| Slc2a5          | 6.67 | 8.58  | 3.78 |
| Slc26a9         | 6.70 | 8.62  | 3.78 |
| Ormdl1          | 7.70 | 9.61  | 3.76 |
| Lyplal1         | 7.97 | 9.87  | 3.74 |
| Sike1           | 9.06 | 10.96 | 3.73 |
| Npas2           | 6.41 | 8.30  | 3.72 |
| Grhl1           | 7.04 | 8.93  | 3.72 |
| Gjb4            | 7.44 | 9.34  | 3.71 |
| Dmkn            | 6.83 | 8.72  | 3.71 |
| Slc22a23        | 7.94 | 9.83  | 3.71 |
| Htatip2         | 6.81 | 8.69  | 3.69 |
| Dcun1d4         | 7.65 | 9.53  | 3.69 |
| Casp6           | 8.18 | 10.07 | 3.69 |
| Defb4           | 5.31 | 7.19  | 3.69 |
| Cldn6           | 6.89 | 8.77  | 3.69 |
| Tspan17         | 8.32 | 10.20 | 3.69 |
| Fabp5 Fabp5l2   | 9.45 | 11.33 | 3.69 |
| Tgfb2           | 8.64 | 10.52 | 3.69 |
| Llg2            | 8.18 | 10.06 | 3.68 |
| Eef1e1          | 9.04 | 10.91 | 3.65 |
| Pkp3            | 7.52 | 9.39  | 3.65 |
| Maml2           | 7.66 | 9.52  | 3.64 |
| Ccdc90b Ankrd42 | 6.03 | 7.90  | 3.64 |
| Pla2g4a         | 8.00 | 9.86  | 3.63 |
| Sel1l3          | 6.74 | 8.60  | 3.63 |
| Fut2            | 6.90 | 8.76  | 3.62 |
| Cpne3           | 9.53 | 11.38 | 3.61 |
| Thnsl1          | 7.15 | 9.00  | 3.60 |
| Cbr4            | 8.00 | 9.85  | 3.60 |
| Pcgf6           | 8.51 | 10.36 | 3.60 |
| Pcyt1b          | 7.09 | 8.93  | 3.60 |
| Trim16 Fbxw10   | 8.23 | 10.08 | 3.60 |
| Arhgap40        | 7.22 | 9.07  | 3.59 |
| Ano9            | 6.55 | 8.40  | 3.59 |
| Serpinb2        | 9.35 | 11.20 | 3.59 |
| Apol7a          | 5.83 | 7.67  | 3.58 |
| Rps6ka2         | 7.16 | 8.99  | 3.58 |
| Rab11fip1       | 8.41 | 10.25 | 3.58 |
| Tnc             | 9.70 | 11.54 | 3.57 |
| Fam83g Slc5a10  | 6.49 | 8.32  | 3.57 |
|                 | 7.72 | 9.55  | 3.56 |
| Sc5d            | 9.40 | 11.23 | 3.56 |
| Nbeal2          | 8.41 | 10.25 | 3.56 |
| Atg4a Syt6      | 8.20 | 10.03 | 3.56 |
| Dsp Gm10129     | 7.99 | 9.82  | 3.55 |
| Pard6g          | 9.14 | 10.97 | 3.55 |
| Gtpbp10         | 7.06 | 8.89  | 3.54 |
| Irak2           | 7.64 | 9.47  | 3.54 |
| Oxct1           | 8.84 | 10.67 | 3.53 |
| Cds1            | 6.41 | 8.23  | 3.53 |

|                   |       |       |      |
|-------------------|-------|-------|------|
| Cmas              | 8.13  | 9.95  | 3.53 |
| Chmp2b            | 9.21  | 11.03 | 3.53 |
| Atg4c             | 6.86  | 8.68  | 3.53 |
| Slc25a17          | 10.55 | 12.36 | 3.53 |
| Rnf19a            | 8.40  | 10.21 | 3.53 |
| Grhl3             | 8.24  | 10.05 | 3.52 |
| Lphn2 LOC10004805 |       |       |      |
| 0                 | 7.07  | 8.89  | 3.52 |
| Nipsnap1          | 8.39  | 10.21 | 3.52 |
| Atg9b             | 8.33  | 10.15 | 3.52 |
| Slc39a4           | 6.84  | 8.65  | 3.51 |
| Mobkl2b           | 5.67  | 7.48  | 3.51 |
| Vangl2            | 7.17  | 8.98  | 3.50 |
| Acer3             | 8.19  | 10.00 | 3.50 |
| 2310038E17Rik     | 9.26  | 11.07 | 3.50 |
| Gm9908            | 8.18  | 9.98  | 3.50 |
| Pbp2              | 7.31  | 9.12  | 3.50 |
| Gm5662            | 6.19  | 8.00  | 3.50 |
| Cytsb             | 8.20  | 10.01 | 3.50 |
| Prnd              | 6.53  | 8.33  | 3.49 |
| Celsr1            | 7.47  | 9.27  | 3.48 |
| Gtpbp10           | 7.30  | 9.09  | 3.47 |
| Fscn1             | 10.71 | 12.51 | 3.47 |
| Rgs10             | 8.83  | 10.62 | 3.47 |
| Mir205            | 5.93  | 7.72  | 3.47 |
| Tslp              | 5.81  | 7.60  | 3.47 |
| Map4k5            | 9.19  | 10.99 | 3.46 |
| Fytd1             | 8.33  | 10.12 | 3.46 |
| Duox1             | 6.79  | 8.58  | 3.46 |
| Tnfrsf26          | 6.89  | 8.68  | 3.46 |
| Msi2              | 7.97  | 9.76  | 3.46 |
| Ephb3             | 8.29  | 10.08 | 3.45 |
| Frk               | 8.28  | 10.07 | 3.44 |
|                   | 5.19  | 6.97  | 3.44 |
| Acadm             | 8.56  | 10.34 | 3.44 |
| Pcyox1            | 9.79  | 11.57 | 3.43 |
| Serpinb8          | 8.73  | 10.50 | 3.43 |
| Rab38             | 8.10  | 9.87  | 3.43 |
| Hddc2             | 8.38  | 10.15 | 3.42 |
| Ephb6             | 7.92  | 9.70  | 3.42 |
| Flrt3             | 7.18  | 8.95  | 3.42 |
| Lss               | 8.60  | 10.37 | 3.41 |
| Znrf2             | 8.63  | 10.40 | 3.41 |
| Wnt4              | 8.18  | 9.95  | 3.41 |
| Echs1             | 8.28  | 10.04 | 3.40 |
| Cpe               | 9.89  | 11.65 | 3.40 |
| Ptpn22            | 6.01  | 7.78  | 3.40 |
| Lrrc16a           | 7.76  | 9.51  | 3.38 |
| Nrp1              | 9.70  | 11.46 | 3.37 |
| Tmem229b Gm5423   | 8.47  | 10.22 | 3.36 |
| Zdhhc23           | 6.15  | 7.90  | 3.36 |
| Pcdhb15           | 6.78  | 8.53  | 3.35 |
| Mllt3             | 8.13  | 9.87  | 3.34 |
| Il15              | 6.65  | 8.39  | 3.33 |
| Sik1              | 10.24 | 11.98 | 3.33 |

|               |       |       |      |
|---------------|-------|-------|------|
| Slc43a2       | 7.03  | 8.76  | 3.32 |
| Tom111 Cox11  | 7.58  | 9.31  | 3.32 |
| Dsc3          | 10.09 | 11.82 | 3.32 |
| Mobkl3        | 9.12  | 10.85 | 3.31 |
| 2610001J05Rik | 8.27  | 10.00 | 3.31 |
| Serf1         | 7.70  | 9.42  | 3.30 |
| Nsun3         | 9.14  | 10.86 | 3.29 |
| Hspa1a Hspa1b | 9.63  | 11.35 | 3.29 |
| Zc3h12c       | 8.06  | 9.78  | 3.29 |
| Efna4         | 8.21  | 9.93  | 3.29 |
| Zfp827        | 7.59  | 9.31  | 3.28 |
| Bcl10         | 9.21  | 10.92 | 3.28 |
| Hoxa1         | 7.21  | 8.92  | 3.28 |
| Dusp18        | 7.34  | 9.05  | 3.28 |
| Krcc1         | 7.11  | 8.82  | 3.28 |
| Hoxc8         | 6.82  | 8.53  | 3.27 |
| Sh3pxd2b      | 7.42  | 9.12  | 3.26 |
| Cetn2         | 7.39  | 9.09  | 3.26 |
| G6pdx         | 11.23 | 12.93 | 3.25 |
| Usp53         | 8.23  | 9.93  | 3.25 |
| Scd2          | 11.62 | 13.32 | 3.25 |
| Pgap1         | 7.24  | 8.94  | 3.25 |
| Ktelc1        | 9.65  | 11.35 | 3.24 |
| Plscr1        | 10.44 | 12.14 | 3.24 |
| Epha4         | 8.45  | 10.15 | 3.24 |
| Blzf1         | 8.92  | 10.62 | 3.24 |
| Vsig10l       | 7.76  | 9.46  | 3.24 |
| Nrap          | 8.26  | 9.95  | 3.24 |
| Stx19         | 6.05  | 7.74  | 3.23 |
| Chmp4c        | 7.50  | 9.19  | 3.22 |
| Sms           | 7.24  | 8.93  | 3.22 |
| Krtcap3       | 8.57  | 10.25 | 3.22 |
| Gmds          | 8.61  | 10.30 | 3.21 |
| Paqr8         | 7.18  | 8.86  | 3.21 |
| Arfgef1       | 8.54  | 10.21 | 3.20 |
| Sorcs2        | 7.14  | 8.82  | 3.20 |
| Rnf122        | 7.78  | 9.46  | 3.20 |
| Zdhhc9        | 9.27  | 10.95 | 3.19 |
| Fhl2          | 8.14  | 9.81  | 3.19 |
| Gnaq          | 9.01  | 10.68 | 3.19 |
| Grpel2        | 9.36  | 11.03 | 3.19 |
| Nipal4        | 9.12  | 10.79 | 3.18 |
| Dlg3          | 6.89  | 8.56  | 3.18 |
| Pik3c2a       | 8.15  | 9.82  | 3.18 |
| Stx11         | 8.84  | 10.51 | 3.18 |
| Krtap1-5      | 5.91  | 7.58  | 3.18 |
| Ilf9          | 5.83  | 7.50  | 3.18 |
| Amd1 Amd2     | 9.62  | 11.29 | 3.18 |
| Med21         | 7.99  | 9.65  | 3.18 |
| Chd7          | 6.53  | 8.20  | 3.18 |
| Pmepa1        | 9.73  | 11.39 | 3.16 |
| D930014E17Rik | 8.57  | 10.23 | 3.16 |
| Amn1          | 7.71  | 9.37  | 3.16 |
| Amd1 Amd2     | 9.62  | 11.28 | 3.16 |
| Igfbp7        | 11.95 | 13.61 | 3.16 |

|                    |       |       |      |
|--------------------|-------|-------|------|
| Dusp7              | 11.36 | 13.02 | 3.16 |
| Fam84a             | 7.34  | 8.99  | 3.15 |
| Rgnf               | 8.15  | 9.81  | 3.15 |
| Atp8a1             | 6.59  | 8.24  | 3.15 |
| Mfsd6              | 8.76  | 10.42 | 3.14 |
| Mia2               | 5.81  | 7.46  | 3.14 |
| Glrx3              | 7.55  | 9.20  | 3.14 |
| Apob48r Cln3       | 7.60  | 9.24  | 3.13 |
| Sertad4            | 7.08  | 8.72  | 3.13 |
| Hes6               | 8.61  | 10.25 | 3.13 |
| Lace1              | 8.24  | 9.88  | 3.12 |
|                    | 6.65  | 8.29  | 3.12 |
| F2r1               | 7.21  | 8.85  | 3.12 |
| Tspan14            | 10.00 | 11.64 | 3.12 |
| Tifa               | 6.42  | 8.07  | 3.12 |
| Uck2               | 7.54  | 9.18  | 3.12 |
| Mboat1             | 9.85  | 11.49 | 3.11 |
| Myc                | 10.59 | 12.22 | 3.10 |
| Krt16              | 6.80  | 8.43  | 3.10 |
| Dennd2d 2010016l18 |       |       |      |
| Rik                | 7.22  | 8.85  | 3.10 |
| Tsg101             | 9.19  | 10.82 | 3.09 |
| C77370             | 5.55  | 7.18  | 3.09 |
| Hddc3              | 6.98  | 8.61  | 3.09 |
| Chac2              | 7.29  | 8.92  | 3.09 |
| Rap2c              | 7.65  | 9.27  | 3.09 |
| Ece2               | 8.44  | 10.07 | 3.09 |
| Lama5              | 9.15  | 10.77 | 3.08 |
| Tprn               | 7.56  | 9.18  | 3.08 |
| Dbp Sphk2          | 8.79  | 10.41 | 3.08 |
| Ldhd               | 7.20  | 8.82  | 3.08 |
| 2610018G03Rik      | 7.91  | 9.53  | 3.08 |
| Erlin2             | 9.33  | 10.95 | 3.07 |
| Bhlhe40            | 9.76  | 11.38 | 3.07 |
| 1110008L16Rik      | 8.95  | 10.56 | 3.07 |
| Klk10              | 8.48  | 10.10 | 3.07 |
| Amd1 Amd2          | 9.66  | 11.28 | 3.07 |
| Gmcl1              | 8.22  | 9.84  | 3.07 |
| Ppa2               | 7.56  | 9.17  | 3.07 |
| Psd4               | 6.64  | 8.26  | 3.06 |
| Slc17a5            | 8.87  | 10.49 | 3.06 |
| Nit1               | 9.32  | 10.93 | 3.06 |
| B4galt3            | 8.66  | 10.27 | 3.06 |
| Fgy                | 7.00  | 8.61  | 3.06 |
| Fdps               | 9.94  | 11.55 | 3.06 |
| Serpinb11          | 5.15  | 6.76  | 3.05 |
| Arl4c              | 7.38  | 8.98  | 3.05 |
| Sgk3               | 7.16  | 8.77  | 3.04 |
| Areg               | 7.30  | 8.91  | 3.04 |
| 8430408G22Rik      | 6.37  | 7.98  | 3.04 |
| Glrx               | 9.23  | 10.84 | 3.04 |
| Hbegf              | 7.95  | 9.56  | 3.04 |
| Tfb2m              | 8.00  | 9.60  | 3.03 |
| Amd1 Amd2          | 9.62  | 11.22 | 3.03 |
| Fam164a            | 8.41  | 10.01 | 3.03 |

|                     |       |       |      |
|---------------------|-------|-------|------|
| Ank                 | 7.83  | 9.43  | 3.03 |
| Slco1a5             | 5.80  | 7.39  | 3.02 |
| Vgll4               | 9.51  | 11.11 | 3.02 |
| Gcsh                | 5.84  | 7.44  | 3.02 |
| Idh1                | 9.87  | 11.46 | 3.02 |
| Il1rn               | 8.45  | 10.04 | 3.01 |
| Mvd                 | 8.56  | 10.16 | 3.01 |
| Ptgs2               | 9.28  | 10.87 | 3.01 |
| Atg4a Syt6          | 7.96  | 9.55  | 3.01 |
| Endod1              | 9.01  | 10.60 | 3.01 |
| Akap6               | 6.00  | 7.59  | 3.00 |
|                     | 11.46 | 13.05 | 3.00 |
| Tfb2m               | 8.01  | 9.60  | 3.00 |
| 3110053B16Rik LOC1  |       |       |      |
| 00046614            | 6.24  | 7.82  | 3.00 |
| Myo1b               | 8.10  | 9.68  | 2.99 |
| Ovol2               | 7.44  | 9.02  | 2.98 |
| Zc3h12c             | 8.49  | 10.07 | 2.98 |
| Malt1               | 7.38  | 8.95  | 2.98 |
| Tmem125             | 6.81  | 8.39  | 2.97 |
| Fam160a1            | 7.71  | 9.28  | 2.97 |
| Tspan7              | 10.65 | 12.22 | 2.97 |
| Rab11fip5           | 8.83  | 10.40 | 2.97 |
| Plcd1               | 8.66  | 10.23 | 2.97 |
| Vangl1              | 8.49  | 10.06 | 2.96 |
| Acadl               | 9.05  | 10.61 | 2.96 |
| Lrrc56 1600016N20Ri |       |       |      |
| k                   | 6.97  | 8.54  | 2.96 |
| Hs6st1              | 8.79  | 10.35 | 2.95 |
| Nif3l1 Ppil3        | 9.43  | 10.99 | 2.95 |
| Angptl2             | 9.34  | 10.90 | 2.95 |
| Prkcz               | 7.11  | 8.66  | 2.94 |
| Itm2a               | 6.01  | 7.56  | 2.94 |
| Cav2                | 9.62  | 11.17 | 2.93 |
| Clns1a              | 8.31  | 9.86  | 2.93 |
| Nbea                | 8.35  | 9.91  | 2.93 |
| Hspb8               | 9.54  | 11.09 | 2.93 |
| Mycbp               | 8.44  | 9.99  | 2.93 |
| Rpl22l1 LOC1000420  |       |       |      |
| 49                  | 6.29  | 7.84  | 2.93 |
| Ccl28               | 6.08  | 7.62  | 2.92 |
| Abcg1               | 7.89  | 9.44  | 2.92 |
| Il7                 | 6.00  | 7.54  | 2.92 |
| Bid                 | 9.14  | 10.69 | 2.92 |
|                     | 5.26  | 6.80  | 2.92 |
| Klf5                | 8.94  | 10.48 | 2.92 |
| Micall2             | 9.19  | 10.73 | 2.91 |
| Slc1a1              | 6.78  | 8.32  | 2.91 |
| Cdc42ep5            | 9.63  | 11.17 | 2.91 |
| Ncs1                | 7.89  | 9.43  | 2.91 |
| Cth                 | 7.32  | 8.86  | 2.91 |
| Zfp809              | 9.63  | 11.17 | 2.91 |
| Rgs3                | 7.79  | 9.33  | 2.91 |
| Serpina9            | 6.14  | 7.68  | 2.91 |
| Jup                 | 11.66 | 13.20 | 2.91 |

|                      |       |       |      |
|----------------------|-------|-------|------|
| Mrpl19 AW146020      | 9.22  | 10.76 | 2.90 |
| Sms Gm8234           | 7.22  | 8.75  | 2.90 |
| Arrdc1               | 9.42  | 10.96 | 2.90 |
| Zhx2                 | 7.07  | 8.61  | 2.90 |
| Sept5 Gp1bb          | 9.08  | 10.61 | 2.89 |
| Stard10              | 10.26 | 11.79 | 2.89 |
| Sumo1                | 7.79  | 9.33  | 2.89 |
| Zfand1               | 8.19  | 9.72  | 2.89 |
| Ptplb                | 11.13 | 12.66 | 2.88 |
| Rnase1               | 6.74  | 8.27  | 2.88 |
|                      | 6.20  | 7.72  | 2.88 |
| Akr1c18              | 5.81  | 7.33  | 2.87 |
| Stfa1                | 5.34  | 6.86  | 2.87 |
| Sprr2a1 Sprr2a2 Sprr |       |       |      |
| 2a3                  | 12.16 | 13.68 | 2.87 |
| Ocm                  | 6.34  | 7.86  | 2.87 |
| Taf4b                | 7.20  | 8.72  | 2.87 |
| Usp46                | 8.51  | 10.03 | 2.87 |
| Lgr4                 | 7.63  | 9.15  | 2.87 |
| D730005E14Rik        | 7.17  | 8.69  | 2.87 |
|                      | 7.61  | 9.13  | 2.87 |
| Insig2               | 8.87  | 10.39 | 2.87 |
| Acadslb              | 7.49  | 9.00  | 2.87 |
| Gstm5 4933431E20Ri   |       |       |      |
| k                    | 8.32  | 9.84  | 2.86 |
| 2810408A11Rik        | 6.69  | 8.21  | 2.86 |
| Akr1c13              | 5.75  | 7.27  | 2.86 |
| Arhgef3              | 7.82  | 9.33  | 2.86 |
| Gm16372              | 7.36  | 8.88  | 2.86 |
| Cyp2j9               | 6.43  | 7.95  | 2.86 |
| Rpl22l1 LOC1000420   |       |       |      |
| 49                   | 6.38  | 7.90  | 2.85 |
| Rbm34                | 7.81  | 9.32  | 2.85 |
| Nt5c3                | 6.91  | 8.42  | 2.85 |
| Mst1                 | 8.38  | 9.89  | 2.85 |
| Gylt1b               | 7.05  | 8.56  | 2.85 |
| Arhgef9              | 6.43  | 7.94  | 2.85 |
| Oma1                 | 7.86  | 9.37  | 2.85 |
| Ccdc126              | 6.81  | 8.32  | 2.85 |
| Mrpl36               | 9.07  | 10.58 | 2.85 |
| Atp13a4              | 6.06  | 7.56  | 2.84 |
| Socs2 Gm9847         | 9.45  | 10.96 | 2.84 |
| Tmod3                | 9.58  | 11.08 | 2.84 |
| Sdc1                 | 11.38 | 12.88 | 2.84 |
| Nck2                 | 8.17  | 9.67  | 2.84 |
| Tpd52                | 8.91  | 10.41 | 2.83 |
| Chmp1b               | 8.12  | 9.62  | 2.83 |
| Cd276                | 8.64  | 10.14 | 2.83 |
| Mid2                 | 9.05  | 10.55 | 2.83 |
| Zfand1               | 8.19  | 9.69  | 2.83 |
| Hcn1                 | 6.02  | 7.52  | 2.83 |
| Dcaf6                | 7.75  | 9.25  | 2.83 |
| Jkamp                | 8.63  | 10.13 | 2.83 |
| Tgif1                | 9.63  | 11.13 | 2.82 |
| Lrp8                 | 7.77  | 9.27  | 2.82 |



|                   |       |       |      |
|-------------------|-------|-------|------|
| Fam102a           | 9.22  | 10.72 | 2.82 |
| Gm14137           | 7.29  | 8.78  | 2.82 |
| Kif26b            | 6.37  | 7.86  | 2.82 |
| Ralgds            | 7.67  | 9.17  | 2.82 |
| Hmgcr             | 9.21  | 10.70 | 2.81 |
| Chd7              | 6.25  | 7.74  | 2.81 |
| Pip5k1b           | 6.14  | 7.63  | 2.81 |
| Bpnt1             | 9.00  | 10.49 | 2.81 |
| Mrgpre            | 7.60  | 9.09  | 2.81 |
| Dnajc15           | 7.42  | 8.91  | 2.80 |
| Jarid2            | 7.96  | 9.45  | 2.80 |
| D730001G18Rik     | 7.81  | 9.29  | 2.80 |
| 5730508B09Rik     | 7.89  | 9.37  | 2.80 |
| Ccdc91            | 7.83  | 9.31  | 2.80 |
| Cfdp1             | 10.22 | 11.70 | 2.80 |
| Dll1              | 6.61  | 8.09  | 2.79 |
| Sumo1             | 8.43  | 9.91  | 2.79 |
| Mreg              | 7.81  | 9.28  | 2.79 |
| Pard6b            | 8.26  | 9.74  | 2.79 |
| Gsta3             | 10.61 | 12.09 | 2.79 |
| Loxl4             | 8.64  | 10.12 | 2.79 |
| Fut9              | 5.82  | 7.29  | 2.79 |
| Pts               | 7.11  | 8.58  | 2.78 |
| Slc7a6            | 9.71  | 11.18 | 2.78 |
| Gimap9            | 6.69  | 8.17  | 2.78 |
| Amd1 2700099C18Ri |       |       |      |
| k                 | 9.56  | 11.04 | 2.78 |
| Lipt1             | 6.40  | 7.88  | 2.78 |
| Hiat1             | 9.64  | 11.11 | 2.78 |
| Icam1             | 8.00  | 9.47  | 2.78 |
| Ltv1              | 8.22  | 9.69  | 2.78 |
| Tpk1              | 6.80  | 8.27  | 2.77 |
| Pdp2              | 6.86  | 8.33  | 2.77 |
| 1700055N04Rik     | 6.08  | 7.56  | 2.77 |
| Psm10             | 9.26  | 10.73 | 2.77 |
| Sdc3              | 7.67  | 9.14  | 2.77 |
| Kctd21            | 6.94  | 8.41  | 2.77 |
| Cyp2j6            | 7.49  | 8.96  | 2.77 |
| Acly              | 9.22  | 10.68 | 2.76 |
| Nudt2             | 7.78  | 9.24  | 2.76 |
| Sgtb              | 7.09  | 8.55  | 2.76 |
| Mycl1             | 7.38  | 8.84  | 2.76 |
| Abcb10            | 7.81  | 9.27  | 2.76 |
| Hebp2             | 7.20  | 8.67  | 2.76 |
| Dram2             | 9.68  | 11.14 | 2.76 |
| Ap1s3             | 8.49  | 9.96  | 2.76 |
| Sema4a            | 7.62  | 9.08  | 2.75 |
| Gpr126            | 7.60  | 9.06  | 2.75 |
| Tmigd1            | 6.58  | 8.04  | 2.75 |
| Krt8              | 6.58  | 8.04  | 2.75 |
| Krt8              | 8.23  | 9.69  | 2.75 |
| 1810014F10Rik     | 6.77  | 8.22  | 2.75 |
| Tex15             | 6.44  | 7.89  | 2.75 |
| Lym5 Kras         | 6.43  | 7.89  | 2.75 |
| Myh14             | 7.90  | 9.36  | 2.74 |

|                    |       |       |      |
|--------------------|-------|-------|------|
| Plekha5            | 6.95  | 8.41  | 2.74 |
| Fdft1              | 10.68 | 12.14 | 2.74 |
| Morc4              | 7.70  | 9.15  | 2.73 |
| Eil2               | 8.62  | 10.07 | 2.73 |
| Mitf               | 6.69  | 8.13  | 2.73 |
| Bcl7a              | 8.51  | 9.96  | 2.72 |
| Acn9               | 7.80  | 9.24  | 2.72 |
| Car5b              | 10.15 | 11.59 | 2.72 |
| Grasp              | 8.91  | 10.35 | 2.72 |
| Tmem168            | 8.44  | 9.88  | 2.72 |
| Dusp10             | 8.39  | 9.83  | 2.72 |
| N6amt1             | 7.96  | 9.40  | 2.72 |
| Polr1d             | 9.35  | 10.79 | 2.72 |
| Sox15 Sox16        | 7.19  | 8.63  | 2.71 |
| Eif4e              | 8.60  | 10.04 | 2.71 |
| Pank1              | 7.29  | 8.72  | 2.71 |
| 2410127L17Rik      | 7.26  | 8.70  | 2.71 |
| Polr3e             | 7.63  | 9.06  | 2.71 |
| Auts2              | 6.61  | 8.05  | 2.70 |
| Zfp185             | 7.40  | 8.83  | 2.70 |
| Ostc               | 9.69  | 11.12 | 2.70 |
| Unc13b             | 6.75  | 8.18  | 2.70 |
| Tuba4a             | 10.61 | 12.04 | 2.70 |
| Igfbp2             | 7.32  | 8.75  | 2.70 |
| Abhd11             | 9.20  | 10.63 | 2.69 |
| Nars2              | 7.42  | 8.85  | 2.69 |
| Pno1               | 9.18  | 10.61 | 2.69 |
| Chd7               | 5.85  | 7.28  | 2.69 |
| Pthlh              | 7.44  | 8.87  | 2.69 |
| Sh3bp2             | 8.16  | 9.59  | 2.69 |
| Pmaip1             | 8.70  | 10.13 | 2.69 |
| C330018D20Rik      | 7.82  | 9.25  | 2.69 |
| Rdh11              | 8.85  | 10.27 | 2.69 |
| 0610037P05Rik      | 9.45  | 10.88 | 2.69 |
| Smox               | 9.62  | 11.05 | 2.69 |
| Mecom              | 6.63  | 8.05  | 2.69 |
| Chd7               | 5.93  | 7.36  | 2.69 |
| Cnfn               | 7.44  | 8.87  | 2.69 |
| Gm12669 Glr3       | 8.30  | 9.72  | 2.68 |
| Cdk18              | 10.23 | 11.66 | 2.68 |
| 2410127L17Rik      | 7.28  | 8.70  | 2.68 |
| Rapgef1            | 6.34  | 7.76  | 2.68 |
| Btbd1              | 8.17  | 9.59  | 2.68 |
| Dapk2              | 6.91  | 8.33  | 2.68 |
| Fam32a             | 9.50  | 10.93 | 2.68 |
| Alcam              | 8.83  | 10.25 | 2.68 |
| Tulp3              | 9.15  | 10.58 | 2.68 |
| Ube2g1             | 9.17  | 10.59 | 2.67 |
| Yipf5              | 9.83  | 11.24 | 2.67 |
| Ceacam1            | 6.72  | 8.14  | 2.67 |
| Ctnnd1             | 10.13 | 11.55 | 2.67 |
| Shkbp1             | 8.24  | 9.65  | 2.67 |
| Mmp15              | 9.87  | 11.29 | 2.67 |
| 1110001A16Rik Cebp |       |       |      |
| z                  | 8.64  | 10.05 | 2.66 |

|               |       |       |      |
|---------------|-------|-------|------|
| Ralgps2       | 6.99  | 8.41  | 2.66 |
| Ppp2r5c       | 6.38  | 7.80  | 2.66 |
| Rab11a        | 9.57  | 10.98 | 2.66 |
| 5730601F06Rik | 9.12  | 10.53 | 2.66 |
| G6pd2         | 8.89  | 10.30 | 2.66 |
| Cops3         | 9.23  | 10.64 | 2.65 |
| Gbe1          | 8.32  | 9.73  | 2.65 |
| Yipf5         | 9.44  | 10.85 | 2.65 |
| Trp53inp2     | 9.39  | 10.79 | 2.65 |
| 3110040N11Rik | 8.34  | 9.75  | 2.65 |
|               | 6.70  | 8.11  | 2.65 |
| Il23r         | 5.67  | 7.08  | 2.65 |
| 5730403M16Rik | 7.54  | 8.95  | 2.65 |
| Isoc1         | 9.69  | 11.10 | 2.65 |
| Herc4         | 7.86  | 9.26  | 2.64 |
| Zfp810        | 7.32  | 8.72  | 2.64 |
| 0610009B22Rik | 9.58  | 10.98 | 2.64 |
| Hivep1        | 8.56  | 9.96  | 2.64 |
| Hmgb3         | 6.74  | 8.14  | 2.64 |
| Cpa4          | 5.99  | 7.39  | 2.64 |
| Mblac2        | 6.93  | 8.33  | 2.64 |
| 2310008H09Rik | 7.45  | 8.84  | 2.63 |
| Tnfrsf23      | 10.99 | 12.38 | 2.63 |
| Kpna1         | 9.28  | 10.68 | 2.63 |
| Rasa3         | 9.98  | 11.37 | 2.63 |
| Fam49b        | 8.89  | 10.29 | 2.63 |
| Zfp277        | 7.87  | 9.26  | 2.63 |
| Rabif         | 8.93  | 10.32 | 2.63 |
| Phactr2       | 8.17  | 9.56  | 2.63 |
| Usp3          | 8.54  | 9.93  | 2.63 |
| Hibadh        | 10.07 | 11.47 | 2.63 |
| Pdgfa         | 10.14 | 11.53 | 2.62 |
| Snord116      | 5.97  | 7.36  | 2.62 |
| Pcmd1         | 8.50  | 9.89  | 2.62 |
| Dtd1          | 8.48  | 9.87  | 2.62 |
| Hes1          | 8.27  | 9.66  | 2.62 |
| Tubb2b        | 7.99  | 9.38  | 2.62 |
| Eapp          | 8.20  | 9.59  | 2.62 |
| Tc2n          | 5.23  | 6.61  | 2.61 |
| Taf5l         | 7.82  | 9.20  | 2.61 |
| Tmprss4       | 7.00  | 8.38  | 2.61 |
| Tmtc2         | 6.00  | 7.39  | 2.61 |
| Uck2          | 10.98 | 12.36 | 2.61 |
| Ptpre         | 6.78  | 8.17  | 2.61 |
| Mpp7          | 8.34  | 9.72  | 2.61 |
| Foxc1         | 7.22  | 8.60  | 2.60 |
| Mipol1 Gm5081 | 7.19  | 8.57  | 2.60 |
| Snx15         | 9.09  | 10.47 | 2.60 |
| Gm5478        | 6.56  | 7.93  | 2.60 |
| Snord116      | 6.03  | 7.40  | 2.59 |
| 9030420J04Rik | 9.38  | 10.75 | 2.59 |
| Cpeb2         | 8.25  | 9.62  | 2.58 |
| Mkln1         | 8.71  | 10.08 | 2.58 |
| Snord116      | 5.98  | 7.35  | 2.58 |
| Arrdc4        | 7.48  | 8.85  | 2.58 |

|                     |       |       |      |
|---------------------|-------|-------|------|
|                     | 7.03  | 8.40  | 2.58 |
| Chd7                | 5.75  | 7.11  | 2.58 |
| Uba3                | 9.29  | 10.66 | 2.58 |
| Cct3                | 9.69  | 11.06 | 2.57 |
| Nuak2               | 8.51  | 9.87  | 2.57 |
| Lmo7                | 7.73  | 9.09  | 2.57 |
| Pja1                | 8.70  | 10.06 | 2.57 |
| Snord116            | 6.00  | 7.36  | 2.57 |
| Sema3c              | 10.14 | 11.50 | 2.56 |
| Ublcp1              | 7.24  | 8.60  | 2.56 |
| H2afy2              | 6.51  | 7.87  | 2.56 |
| Rtkn                | 8.91  | 10.27 | 2.56 |
| Tpm2                | 7.55  | 8.91  | 2.56 |
| Zfp317              | 7.87  | 9.23  | 2.56 |
| Usp10               | 9.27  | 10.63 | 2.56 |
| Snord116            | 6.01  | 7.36  | 2.56 |
| Snord116            | 6.01  | 7.37  | 2.56 |
| Entpd3              | 6.94  | 8.29  | 2.55 |
| Snord116            | 6.01  | 7.36  | 2.55 |
| Cldn23              | 6.30  | 7.65  | 2.55 |
| Snord116            | 6.01  | 7.36  | 2.55 |
| Snord116            | 6.02  | 7.37  | 2.55 |
| Snord116            | 6.01  | 7.36  | 2.55 |
| Snord116            | 6.02  | 7.37  | 2.55 |
| Dusp11              | 9.15  | 10.50 | 2.55 |
| Tlr3                | 8.72  | 10.07 | 2.55 |
| Snord116            | 6.01  | 7.36  | 2.55 |
| Psm14               | 10.25 | 11.60 | 2.55 |
| Snord116            | 6.01  | 7.36  | 2.55 |
| Snord116            | 6.02  | 7.37  | 2.55 |
| Snord116            | 6.01  | 7.36  | 2.55 |
| Snord116            | 6.01  | 7.36  | 2.54 |
| Fgfr1op2            | 8.64  | 9.98  | 2.54 |
| Snord116            | 6.02  | 7.37  | 2.54 |
| Snord116            | 6.01  | 7.36  | 2.54 |
| 2410127L17Rik       | 7.85  | 9.19  | 2.54 |
| Fam20b              | 9.44  | 10.79 | 2.54 |
| Snord116            | 6.02  | 7.37  | 2.54 |
| Kremen1             | 9.52  | 10.87 | 2.54 |
| Wdr36               | 8.99  | 10.33 | 2.54 |
| Snord116            | 6.02  | 7.36  | 2.54 |
| Snord116            | 6.02  | 7.36  | 2.54 |
| Birc3               | 8.19  | 9.53  | 2.54 |
| 1110002L01Rik Kif3c | 7.97  | 9.31  | 2.54 |
| Gls                 | 8.16  | 9.50  | 2.54 |
| Serinc5             | 8.92  | 10.26 | 2.53 |
| Golim4              | 8.23  | 9.57  | 2.53 |
| Gnpat               | 9.35  | 10.69 | 2.53 |
| Akirin1             | 8.65  | 9.99  | 2.53 |
| Fundc1              | 9.92  | 11.25 | 2.53 |
| Camk2b              | 8.14  | 9.48  | 2.53 |
| D1Ert448e           | 8.34  | 9.68  | 2.53 |
| Pdpf                | 9.92  | 11.25 | 2.52 |
| Pvrl4               | 8.07  | 9.40  | 2.52 |

|                  |       |       |      |
|------------------|-------|-------|------|
| Tkt              | 8.23  | 9.57  | 2.52 |
| 2410127L17Rik    | 7.88  | 9.22  | 2.52 |
| Dnajb6           | 10.65 | 11.98 | 2.52 |
| Slc24a3          | 6.20  | 7.54  | 2.52 |
| Ppp2r1b          | 8.47  | 9.80  | 2.52 |
| Tmem183a         | 9.27  | 10.60 | 2.51 |
| Csf3             | 7.06  | 8.38  | 2.51 |
| Mrps33           | 9.39  | 10.72 | 2.51 |
| Lfng             | 8.16  | 9.48  | 2.51 |
| Ftsjd1           | 7.84  | 9.16  | 2.51 |
| E330009J07Rik    | 6.18  | 7.50  | 2.51 |
| Plekha7          | 7.65  | 8.97  | 2.51 |
| Amd1             | 7.77  | 9.09  | 2.51 |
| Fgd3             | 7.33  | 8.65  | 2.51 |
| Fam103a1 Gm10767 | 8.21  | 9.54  | 2.51 |
| Btbd1            | 7.97  | 9.30  | 2.51 |
| Rnf2             | 8.82  | 10.15 | 2.51 |
| Krt19            | 12.06 | 13.39 | 2.51 |
| Tiprl            | 8.33  | 9.65  | 2.50 |
| Aasdhppt         | 9.02  | 10.35 | 2.50 |
| Rpp38            | 9.84  | 11.16 | 2.50 |
| Atrnl1           | 7.73  | 9.06  | 2.50 |
| Lphn3            | 5.94  | 7.26  | 2.50 |
| Cd99l2           | 10.15 | 11.47 | 2.50 |
| Mfsd9            | 7.10  | 8.42  | 2.50 |
| Ntan1 Pdxdc1     | 8.89  | 10.21 | 2.50 |
| Dnajb6           | 10.64 | 11.96 | 2.49 |
| Acss2            | 8.29  | 9.61  | 2.49 |
| Ddx19b           | 7.13  | 8.45  | 2.49 |
| Efna3            | 9.39  | 10.71 | 2.49 |
| Otub2            | 8.50  | 9.81  | 2.49 |
| Amd1             | 7.69  | 9.01  | 2.49 |
| Sft2d2           | 10.27 | 11.58 | 2.49 |
| Ppp2r5c          | 8.42  | 9.74  | 2.49 |
| Tmem70           | 8.16  | 9.47  | 2.49 |
| Pde7a            | 9.01  | 10.32 | 2.49 |
| Ndufs1           | 8.25  | 9.56  | 2.49 |
| Tspan12          | 7.97  | 9.29  | 2.48 |
| Aldh3b2          | 7.65  | 8.96  | 2.48 |
| Trove2           | 8.31  | 9.62  | 2.48 |
| Phlpp1           | 7.29  | 8.61  | 2.48 |
| Mst1r            | 7.15  | 8.46  | 2.48 |
| Zfp60            | 4.98  | 6.28  | 2.48 |
| Tbca             | 9.16  | 10.46 | 2.47 |
| Cdkn2b           | 9.43  | 10.73 | 2.47 |
| D8Ert82e         | 7.65  | 8.95  | 2.47 |
| Dact2            | 7.69  | 9.00  | 2.47 |
| Htra1            | 10.48 | 11.79 | 2.47 |
| Mpzl1            | 9.45  | 10.75 | 2.47 |
| Nod2             | 6.86  | 8.16  | 2.47 |
| Arg2 Vti1b       | 6.77  | 8.08  | 2.47 |
| Nrp2             | 8.93  | 10.24 | 2.47 |
| Tia1             | 7.79  | 9.10  | 2.47 |
| Gatsl2           | 8.36  | 9.67  | 2.47 |

|                    |       |       |      |
|--------------------|-------|-------|------|
| Cxadr              | 8.18  | 9.48  | 2.47 |
| Metap1             | 9.62  | 10.92 | 2.47 |
| Mars2              | 8.36  | 9.66  | 2.47 |
| Daam1              | 7.99  | 9.29  | 2.46 |
| Fam103a1 Gm10767   | 8.61  | 9.91  | 2.46 |
| Zfp772 2810047C21R |       |       |      |
| ik1                | 7.88  | 9.18  | 2.46 |
| Rab6b              | 8.12  | 9.42  | 2.46 |
| Prss52             | 6.35  | 7.65  | 2.46 |
| Ppp2r3c            | 7.70  | 9.00  | 2.46 |
| Mbp                | 7.05  | 8.35  | 2.46 |
| Uevld              | 7.48  | 8.77  | 2.46 |
| Nfib               | 10.07 | 11.36 | 2.45 |
| Glt28d2            | 7.02  | 8.32  | 2.45 |
| Krt80              | 8.16  | 9.45  | 2.45 |
| Arpc3              | 9.93  | 11.22 | 2.45 |
| Susd1              | 7.33  | 8.63  | 2.45 |
| Vmn2r29            | 6.79  | 8.08  | 2.45 |
| 9630033F20Rik      | 8.36  | 9.65  | 2.45 |
| Apool              | 6.80  | 8.10  | 2.45 |
| Fbxl5              | 8.41  | 9.70  | 2.45 |
| Chchd4             | 8.13  | 9.42  | 2.44 |
| Lemd1              | 6.17  | 7.46  | 2.44 |
| Btbd11             | 7.06  | 8.34  | 2.44 |
| Chd7               | 6.23  | 7.51  | 2.44 |
| Slc40a1            | 6.06  | 7.34  | 2.44 |
| Pvrl2              | 9.20  | 10.48 | 2.44 |
| Trim68             | 7.13  | 8.41  | 2.44 |
| Cmpk1              | 9.36  | 10.65 | 2.44 |
| Fh1                | 9.49  | 10.78 | 2.44 |
| Vmn2r50 2810047C2  |       |       |      |
| 1Rik1              | 7.88  | 9.16  | 2.43 |
| Dnajb6             | 10.79 | 12.07 | 2.43 |
| Dtd1               | 7.48  | 8.76  | 2.43 |
| Nr2c1              | 8.49  | 9.77  | 2.43 |
| Ppfibp2            | 7.62  | 8.90  | 2.43 |
| Pigh Plekhh1       | 7.45  | 8.73  | 2.43 |
| Npsr1              | 6.10  | 7.38  | 2.43 |
| Casz1              | 7.23  | 8.51  | 2.43 |
| Rfk                | 10.23 | 11.51 | 2.43 |
| Trnt1 Crbn         | 7.30  | 8.58  | 2.43 |
| Socs6              | 7.93  | 9.21  | 2.43 |
| Pik3c2b            | 7.38  | 8.66  | 2.43 |
| Ankrd49            | 8.53  | 9.81  | 2.42 |
| Cnnm4              | 7.37  | 8.65  | 2.42 |
| Cotl1              | 8.16  | 9.44  | 2.42 |
| Samd10             | 8.06  | 9.33  | 2.42 |
| Loxl4              | 8.84  | 10.11 | 2.42 |
| Mthfd2l            | 8.49  | 9.76  | 2.42 |
| Chd7               | 6.48  | 7.75  | 2.42 |
| Bloc1s3            | 9.02  | 10.29 | 2.42 |
| Usp14 Thoc1        | 9.40  | 10.68 | 2.42 |
| AK129341           | 6.06  | 7.33  | 2.42 |
| Ube2v2             | 8.78  | 10.05 | 2.42 |

|                      |       |       |      |
|----------------------|-------|-------|------|
| Nup210l              | 6.68  | 7.96  | 2.41 |
| Afap1l1              | 7.72  | 8.99  | 2.41 |
| Fbxo33               | 8.05  | 9.32  | 2.41 |
| Zfand5               | 8.58  | 9.85  | 2.41 |
| Atoh1                | 6.71  | 7.98  | 2.41 |
| Tpm1                 | 10.69 | 11.96 | 2.41 |
| Ddx21                | 9.07  | 10.33 | 2.41 |
| Gm2382 Mthfs LOC10   |       |       |      |
| 0044361              | 6.85  | 8.12  | 2.41 |
| Efnb1                | 8.94  | 10.21 | 2.41 |
| Homer1               | 6.90  | 8.17  | 2.41 |
| Mrpl50               | 8.21  | 9.48  | 2.41 |
| Mrps33               | 9.04  | 10.31 | 2.41 |
| Rasal2               | 7.33  | 8.60  | 2.41 |
| Bcap29               | 7.97  | 9.24  | 2.40 |
| Polb                 | 8.16  | 9.42  | 2.40 |
| 9030409G11Rik        | 7.28  | 8.54  | 2.40 |
| C230030N03Rik        | 7.27  | 8.54  | 2.40 |
| Ppp1cb               | 10.80 | 12.06 | 2.40 |
| Zfand6               | 7.96  | 9.23  | 2.40 |
| Impa2                | 8.09  | 9.36  | 2.40 |
| Rnf138               | 6.87  | 8.13  | 2.40 |
| Stambpl1             | 8.48  | 9.74  | 2.40 |
| Brwd3                | 7.28  | 8.54  | 2.40 |
| Mki67ip              | 9.43  | 10.69 | 2.40 |
| Scnn1a               | 7.45  | 8.71  | 2.40 |
| Gm6624               | 7.02  | 8.28  | 2.40 |
| Adrb3                | 7.09  | 8.35  | 2.39 |
| Mkx                  | 8.01  | 9.26  | 2.39 |
| Trappc2              | 9.09  | 10.35 | 2.39 |
| Olfr1372-ps1         | 6.12  | 7.38  | 2.39 |
| Braf                 | 8.57  | 9.83  | 2.39 |
| 1810013D10Rik        | 9.83  | 11.08 | 2.38 |
| Yipf6                | 8.29  | 9.54  | 2.38 |
| Mbnl3                | 9.30  | 10.55 | 2.38 |
| Cops5                | 8.12  | 9.38  | 2.38 |
| Csta                 | 5.15  | 6.40  | 2.38 |
| Hlf                  | 6.66  | 7.91  | 2.38 |
| Pcdh18               | 7.65  | 8.90  | 2.38 |
| Gan                  | 7.96  | 9.21  | 2.38 |
| Strap                | 9.68  | 10.93 | 2.38 |
| Hk2                  | 7.47  | 8.72  | 2.38 |
| Zfp418               | 7.10  | 8.35  | 2.38 |
| Stx6                 | 9.52  | 10.77 | 2.38 |
| Sesn3                | 7.92  | 9.17  | 2.37 |
| Ap1ar                | 10.09 | 11.33 | 2.37 |
| Phospho2             | 7.78  | 9.03  | 2.37 |
| Ap4b1                | 8.18  | 9.42  | 2.37 |
| Atp13a3              | 7.11  | 8.35  | 2.36 |
| A130010J15Rik Traf3i |       |       |      |
| p3                   | 6.99  | 8.23  | 2.36 |
| Sar1b                | 10.38 | 11.62 | 2.36 |
| Rab30                | 6.35  | 7.59  | 2.36 |
| Suc1g1               | 8.48  | 9.72  | 2.36 |
| Erb2                 | 8.68  | 9.92  | 2.36 |

|                    |       |       |      |
|--------------------|-------|-------|------|
| Syt15              | 6.14  | 7.38  | 2.36 |
| Gm8300 Gm2022 Eif1 |       |       |      |
| a Gm16368          | 9.76  | 11.00 | 2.36 |
| Emp1               | 11.81 | 13.04 | 2.36 |
| Ppdf               | 10.37 | 11.61 | 2.36 |
| Jub                | 8.77  | 10.01 | 2.36 |
| Dapp1              | 8.94  | 10.18 | 2.36 |
| Pppde1             | 8.69  | 9.93  | 2.35 |
| Gm6623 Akirin1     | 9.22  | 10.46 | 2.35 |
| Sdhc               | 10.40 | 11.63 | 2.35 |
| Bpgm               | 6.80  | 8.03  | 2.35 |
| Pcdcd10            | 7.09  | 8.33  | 2.35 |
| Pitpnc1            | 7.94  | 9.17  | 2.35 |
| Cd36               | 7.80  | 9.03  | 2.35 |
| Ndel1              | 9.14  | 10.37 | 2.35 |
| Oxsm               | 8.06  | 9.29  | 2.35 |
| Spg20              | 8.20  | 9.43  | 2.35 |
| Rpia               | 8.11  | 9.34  | 2.34 |
| D630029K05Rik      | 5.79  | 7.02  | 2.34 |
| Pcdhb14            | 5.29  | 6.52  | 2.34 |
| Acvr1b             | 8.16  | 9.38  | 2.34 |
| Fgy                | 7.87  | 9.09  | 2.34 |
| Csde1              | 10.28 | 11.50 | 2.34 |
| Dnajb4             | 8.85  | 10.08 | 2.34 |
| Ept1               | 10.17 | 11.39 | 2.34 |
| Pik3cb             | 9.13  | 10.36 | 2.34 |
| Sftpd              | 6.44  | 7.67  | 2.34 |
| AW209491           | 7.53  | 8.75  | 2.34 |
| Klh7               | 7.80  | 9.02  | 2.34 |
| B4galnt1 Slc26a10  | 10.00 | 11.23 | 2.34 |
| Magi1              | 7.28  | 8.50  | 2.34 |
| Trappc6a           | 9.35  | 10.57 | 2.34 |
| Rab31              | 10.91 | 12.13 | 2.33 |
| Rapgef3            | 8.12  | 9.35  | 2.33 |
| Urb2               | 9.16  | 10.39 | 2.33 |
| Pcdcd6             | 8.76  | 9.99  | 2.33 |
| Ptcd2              | 7.44  | 8.66  | 2.33 |
| Trappc2            | 9.25  | 10.47 | 2.33 |
| Ivl                | 10.81 | 12.03 | 2.33 |
| Uqcrc2 Pdzd9       | 10.88 | 12.10 | 2.33 |
| Vamp7              | 9.77  | 10.99 | 2.33 |
| Vps24              | 7.33  | 8.55  | 2.33 |
| Ahr                | 8.88  | 10.10 | 2.33 |
| Mmrn2              | 6.34  | 7.56  | 2.33 |
| Dusp16             | 8.88  | 10.10 | 2.33 |
| Mobkl2b            | 7.05  | 8.27  | 2.33 |
| Cept1 Dennd2d Dram |       |       |      |
| 2                  | 8.69  | 9.91  | 2.32 |
| Tmem135            | 7.70  | 8.92  | 2.32 |
| Rgs12              | 8.76  | 9.98  | 2.32 |
| Celsr2             | 7.00  | 8.21  | 2.32 |
| Bet1               | 7.44  | 8.66  | 2.32 |
| Wasl               | 9.26  | 10.48 | 2.32 |



|                     |       |       |      |
|---------------------|-------|-------|------|
| Gm8300 Gm2022 Gm    |       |       |      |
| 4027 BB287469 Eif1a |       |       |      |
| Gm16368             | 9.77  | 10.98 | 2.32 |
| Ube2v2 LOC635992    | 9.55  | 10.76 | 2.31 |
| Eif2s2 Gm9892       | 9.04  | 10.25 | 2.31 |
| Rnf11               | 8.41  | 9.62  | 2.31 |
| Tsg101              | 8.98  | 10.19 | 2.31 |
| Rpl7 Gm5045         | 10.55 | 11.76 | 2.31 |
| 5430407P10Rik       | 8.44  | 9.65  | 2.31 |
| Mmachc              | 9.48  | 10.69 | 2.31 |
| Lym1                | 6.41  | 7.62  | 2.31 |
| Lyp1a1              | 9.91  | 11.12 | 2.31 |
| Phldb3              | 7.24  | 8.44  | 2.31 |
| Avpi1               | 11.13 | 12.34 | 2.31 |
| Acot9               | 9.81  | 11.01 | 2.31 |
| Atp6v1a             | 11.18 | 12.38 | 2.31 |
| Cmc1                | 8.50  | 9.71  | 2.31 |
| Gspt1               | 10.87 | 12.08 | 2.31 |
| Ube2v2 LOC635992    | 9.40  | 10.60 | 2.31 |
| Rassf7              | 8.94  | 10.15 | 2.31 |
| 3110082D06Rik       | 6.98  | 8.19  | 2.31 |
| Tmem147             | 9.74  | 10.94 | 2.31 |
| Txndc9              | 10.24 | 11.45 | 2.31 |
| Pdgfb               | 7.76  | 8.96  | 2.30 |
| Psm1                | 10.79 | 12.00 | 2.30 |
| Rab18               | 8.67  | 9.87  | 2.30 |
| Wwox                | 8.19  | 9.40  | 2.30 |
| Rap1a Gm9392        | 8.93  | 10.13 | 2.30 |
| Csf2                | 6.73  | 7.93  | 2.30 |
| Tspan13             | 7.00  | 8.20  | 2.30 |
| Arhgef5             | 9.41  | 10.61 | 2.30 |
| L1cam               | 7.11  | 8.31  | 2.30 |
| Pdha1 Map3k15       | 9.68  | 10.88 | 2.30 |
| Ets2                | 11.22 | 12.42 | 2.30 |
| Mbtps2 Yy2          | 9.36  | 10.56 | 2.30 |
| Kctd11              | 7.35  | 8.55  | 2.30 |
| C80913              | 8.87  | 10.07 | 2.29 |
| Limk2               | 9.61  | 10.80 | 2.29 |
| Fam40a              | 9.12  | 10.32 | 2.29 |
| Cluap1              | 7.98  | 9.18  | 2.29 |
| Memo1               | 8.08  | 9.28  | 2.29 |
| Skint4              | 4.99  | 6.18  | 2.29 |
| Plxnb1              | 8.34  | 9.54  | 2.29 |
| Col18a1             | 8.14  | 9.34  | 2.29 |
| Arhgap27            | 8.03  | 9.23  | 2.29 |
| Fcamr               | 6.55  | 7.75  | 2.29 |
| Gm16407             | 10.20 | 11.39 | 2.29 |
| Isg20               | 10.62 | 11.81 | 2.29 |
| Rasgef1b            | 5.84  | 7.04  | 2.29 |
| Atxn10              | 11.17 | 12.36 | 2.29 |
| Phlda1              | 8.89  | 10.09 | 2.29 |
| Mrps35              | 7.69  | 8.89  | 2.29 |
| Asb7                | 6.90  | 8.09  | 2.29 |
| Uhm1                | 9.80  | 10.99 | 2.29 |
| Utp18               | 7.16  | 8.35  | 2.28 |

|                |       |       |      |
|----------------|-------|-------|------|
| Pigp           | 9.42  | 10.61 | 2.28 |
| Lym7           | 7.02  | 8.21  | 2.28 |
| Nck2           | 7.99  | 9.18  | 2.28 |
| Fdft1 Ctsb     | 10.91 | 12.10 | 2.28 |
| Prepl Slc3a1   | 8.43  | 9.62  | 2.28 |
| D17H6S56E-5    | 11.65 | 12.84 | 2.28 |
| Gm8300 Gm16368 | 9.37  | 10.56 | 2.28 |
| Eif2s3x        | 11.60 | 12.79 | 2.27 |
| Chd7           | 5.65  | 6.83  | 2.27 |
| Ralb           | 9.52  | 10.71 | 2.27 |
| Slc6a6         | 9.48  | 10.66 | 2.27 |
| Arhgef5        | 9.64  | 10.82 | 2.27 |
| Mphosph10      | 7.13  | 8.31  | 2.27 |
| Chd7           | 6.92  | 8.10  | 2.27 |
| Slc35a3        | 8.25  | 9.44  | 2.27 |
| Zfp322a        | 6.96  | 8.14  | 2.27 |
| Vps4b          | 8.49  | 9.67  | 2.27 |
| 1600012F09Rik  | 9.59  | 10.77 | 2.27 |
| Rpl7 Gm5045    | 10.71 | 11.89 | 2.27 |
| Slc7a8         | 6.16  | 7.34  | 2.27 |
| Ii1r1          | 7.34  | 8.52  | 2.27 |
| Fam101b        | 9.47  | 10.65 | 2.27 |
| Cox7b          | 10.15 | 11.33 | 2.27 |
| Leprel1        | 7.66  | 8.83  | 2.26 |
| Glod4          | 7.88  | 9.06  | 2.26 |
| Farsb Sgpp2    | 9.31  | 10.49 | 2.26 |
| Spty2d1        | 7.51  | 8.68  | 2.26 |
| 1190005F20Rik  | 8.35  | 9.53  | 2.26 |
| Tnfsf9         | 8.41  | 9.59  | 2.26 |
| Zfp518         | 7.37  | 8.55  | 2.26 |
| Tdg Gm5806     | 9.21  | 10.38 | 2.26 |
| Zswim6         | 8.73  | 9.90  | 2.26 |
| Ube2f          | 7.70  | 8.88  | 2.26 |
| Det1           | 7.86  | 9.04  | 2.26 |
| Gna15          | 9.40  | 10.58 | 2.26 |
| Mex3a          | 6.76  | 7.94  | 2.26 |
| Cyb5r4         | 8.79  | 9.97  | 2.26 |
| Denr           | 8.06  | 9.24  | 2.26 |
| Fggy           | 6.61  | 7.79  | 2.26 |
| Cog5 Hbp1      | 7.87  | 9.05  | 2.26 |
| Cadm4          | 7.43  | 8.61  | 2.26 |
| Gatsl2         | 6.84  | 8.02  | 2.26 |
| Hibch          | 6.51  | 7.68  | 2.25 |
| Pdlim2         | 8.57  | 9.74  | 2.25 |
| Bace2          | 9.44  | 10.62 | 2.25 |
| Wdr75          | 8.41  | 9.58  | 2.25 |
| Mgst1          | 9.28  | 10.45 | 2.25 |
| Cyb5b          | 11.05 | 12.23 | 2.25 |
| Ltbp1          | 8.71  | 9.88  | 2.25 |
| Iars2          | 8.68  | 9.85  | 2.25 |
| Srebf2         | 10.01 | 11.17 | 2.25 |
| Rpl5           | 10.92 | 12.09 | 2.25 |
| Sema4f         | 6.56  | 7.73  | 2.25 |
| Anxa4          | 10.54 | 11.71 | 2.25 |
| Sqrdl          | 9.42  | 10.59 | 2.25 |

|               |       |       |      |
|---------------|-------|-------|------|
| Ier3          | 7.99  | 9.16  | 2.25 |
| Zfp710        | 8.22  | 9.39  | 2.25 |
| Kifap3        | 8.06  | 9.23  | 2.25 |
| Pi4k2b        | 7.85  | 9.02  | 2.24 |
| Parn          | 8.38  | 9.54  | 2.24 |
| Fam84b        | 6.24  | 7.41  | 2.24 |
| Lyn           | 8.62  | 9.78  | 2.24 |
| Cdkl3         | 6.99  | 8.15  | 2.24 |
| Sprr2k        | 6.19  | 7.35  | 2.24 |
| Rpl5          | 10.83 | 11.99 | 2.24 |
| Psma3         | 10.18 | 11.35 | 2.24 |
| Pex13         | 8.01  | 9.17  | 2.24 |
| Cdh18         | 8.24  | 9.40  | 2.24 |
| Chd7          | 5.75  | 6.91  | 2.24 |
| Rbm45         | 8.90  | 10.06 | 2.24 |
| Nudt7         | 8.25  | 9.42  | 2.24 |
| Rfwd2         | 8.55  | 9.71  | 2.24 |
| Arhgap5       | 8.43  | 9.59  | 2.23 |
| Mcts2         | 8.03  | 9.19  | 2.23 |
| Rpl7 Gm5045   | 10.43 | 11.59 | 2.23 |
| Eif2b5        | 9.40  | 10.56 | 2.23 |
| D330012F22Rik | 8.30  | 9.46  | 2.23 |
| Cul2          | 8.93  | 10.09 | 2.23 |
| 1600012F09Rik | 9.02  | 10.18 | 2.23 |
| Slc35f5       | 9.98  | 11.14 | 2.23 |
| Nfib          | 8.08  | 9.24  | 2.23 |
| Psma3         | 10.04 | 11.20 | 2.23 |
| 2810008M24Rik | 8.10  | 9.26  | 2.23 |
| 1600012H06Rik | 8.45  | 9.61  | 2.23 |
| Bhlhe41       | 8.21  | 9.36  | 2.23 |
| Arhgap32      | 8.68  | 9.84  | 2.23 |
| Lsm6          | 8.20  | 9.36  | 2.23 |
| 1600012F09Rik | 9.03  | 10.18 | 2.23 |
| Dnajb6        | 11.23 | 12.38 | 2.23 |
| Hmgb3         | 7.01  | 8.16  | 2.23 |
| Cldn12        | 8.86  | 10.02 | 2.23 |
| Stra6         | 8.21  | 9.36  | 2.22 |
| Ndst1         | 9.54  | 10.69 | 2.22 |
| Tnfaip8       | 7.97  | 9.13  | 2.22 |
| Lsg1          | 9.40  | 10.56 | 2.22 |
| Pcdhb22       | 6.55  | 7.71  | 2.22 |
| Arl6ip1       | 10.02 | 11.18 | 2.22 |
| Rsl24d1       | 9.43  | 10.59 | 2.22 |
| Clmn          | 5.92  | 7.07  | 2.22 |
| Pafah1b2      | 10.07 | 11.22 | 2.22 |
| Atp5f1        | 9.87  | 11.02 | 2.22 |
| Fam174a       | 7.50  | 8.65  | 2.22 |
| Eif1ax        | 9.14  | 10.29 | 2.22 |
| Muted         | 7.35  | 8.50  | 2.22 |
| Psma5 Gm8394  | 8.72  | 9.87  | 2.22 |
| Ctage5        | 8.85  | 10.00 | 2.22 |
| Rilpl2        | 8.15  | 9.29  | 2.21 |
| Nit2          | 8.90  | 10.04 | 2.21 |
| Ptplad1       | 8.98  | 10.13 | 2.21 |
| Lrba          | 8.09  | 9.23  | 2.21 |

|                     |       |       |      |
|---------------------|-------|-------|------|
| Uchl3               | 8.51  | 9.66  | 2.21 |
| 0610009D07Rik       | 8.23  | 9.38  | 2.21 |
| Rsl24d1             | 9.38  | 10.52 | 2.21 |
| Rpl7 Gm5045         | 10.81 | 11.96 | 2.21 |
| Tmcc3               | 6.78  | 7.92  | 2.21 |
| Sec22a              | 7.76  | 8.91  | 2.21 |
| Cdkn1b              | 6.92  | 8.07  | 2.21 |
| Snx10               | 7.57  | 8.72  | 2.21 |
| Mid1ip1             | 9.51  | 10.65 | 2.21 |
|                     | 7.01  | 8.15  | 2.21 |
| Bcl9                | 8.78  | 9.92  | 2.21 |
| Usp47               | 8.76  | 9.91  | 2.21 |
| Hbp1 Cog5           | 9.83  | 10.97 | 2.21 |
| Vamp4               | 7.68  | 8.82  | 2.20 |
| Sh3bp4              | 8.57  | 9.71  | 2.20 |
| Fgd6                | 7.37  | 8.51  | 2.20 |
| Eif1a               | 8.56  | 9.70  | 2.20 |
| Map3k9              | 6.92  | 8.06  | 2.20 |
| Scamp1              | 9.13  | 10.27 | 2.20 |
| Atp6v1e1            | 9.99  | 11.13 | 2.20 |
| Mark2               | 9.34  | 10.48 | 2.20 |
| Rraga               | 8.90  | 10.04 | 2.20 |
| Pcdhb19             | 5.13  | 6.27  | 2.20 |
|                     | 5.67  | 6.81  | 2.20 |
| Hspb1               | 12.55 | 13.69 | 2.20 |
| D19Bwg1357e         | 8.89  | 10.03 | 2.20 |
| Trmt2b              | 9.00  | 10.14 | 2.20 |
| Glt1d1              | 6.26  | 7.39  | 2.20 |
| Acsl5               | 9.62  | 10.76 | 2.20 |
| Myo1e               | 9.04  | 10.18 | 2.20 |
| Arhgap19            | 7.89  | 9.02  | 2.20 |
| Fkbp4               | 9.31  | 10.44 | 2.20 |
| Id2                 | 10.35 | 11.49 | 2.20 |
| Chd7                | 5.31  | 6.44  | 2.20 |
| Nipa1 A230056P14Ri  |       |       |      |
| k                   | 7.36  | 8.50  | 2.20 |
| Chchd3              | 9.89  | 11.02 | 2.20 |
| Hsf2bp              | 7.31  | 8.45  | 2.20 |
| Jph1                | 6.54  | 7.67  | 2.20 |
| 2200002D01Rik Yif1b | 8.21  | 9.35  | 2.19 |
| Fam98a              | 8.90  | 10.04 | 2.19 |
| Phospho1 Abi3       | 8.17  | 9.31  | 2.19 |
| Snord116            | 6.12  | 7.26  | 2.19 |
| Atg4b               | 8.79  | 9.92  | 2.19 |
| Pdcl3               | 9.55  | 10.68 | 2.19 |
| Zfp68               | 9.02  | 10.15 | 2.19 |
| Lsm6 Gm10043        | 8.87  | 10.00 | 2.19 |
| Eif3e               | 8.85  | 9.98  | 2.19 |
| Golga7              | 9.56  | 10.69 | 2.19 |
| B3gnt3              | 10.12 | 11.25 | 2.19 |
| Yars2               | 8.67  | 9.80  | 2.19 |
| Tmem170             | 9.09  | 10.22 | 2.19 |
| Pdcd5               | 10.65 | 11.77 | 2.19 |
|                     | 8.38  | 9.50  | 2.18 |

## Rgs19|LOC10004794

|                  |       |       |      |
|------------------|-------|-------|------|
| 4                | 9.30  | 10.43 | 2.18 |
| Sp3s3            | 9.68  | 10.81 | 2.18 |
| Jtb              | 8.67  | 9.79  | 2.18 |
| Zfp260           | 7.90  | 9.02  | 2.18 |
| Pfdn1            | 8.72  | 9.85  | 2.18 |
| Lsm6 Gm10043     | 7.94  | 9.07  | 2.18 |
| Wdr26            | 9.74  | 10.87 | 2.18 |
| Bcl2l13          | 9.59  | 10.72 | 2.18 |
| Zfp772           | 6.97  | 8.10  | 2.18 |
| Stk38l           | 8.38  | 9.50  | 2.18 |
| Ydjc Ccdc116     | 7.13  | 8.25  | 2.18 |
| Tmem50b          | 11.40 | 12.52 | 2.18 |
| Psm3             | 10.08 | 11.20 | 2.18 |
| Mmg2             | 9.11  | 10.23 | 2.18 |
| Tmem132a         | 8.32  | 9.44  | 2.18 |
| Pddc1            | 9.81  | 10.93 | 2.18 |
| Mccc2            | 7.64  | 8.76  | 2.17 |
| Txndc17          | 11.52 | 12.64 | 2.17 |
| Sh3kbp1          | 8.40  | 9.52  | 2.17 |
| Tsnax            | 8.04  | 9.15  | 2.17 |
| 2010012O05Rik    | 6.95  | 8.07  | 2.17 |
| Immt             | 9.98  | 11.09 | 2.17 |
| Cep78            | 7.69  | 8.80  | 2.17 |
| Ptcd3            | 8.00  | 9.11  | 2.17 |
| Klhl9            | 6.51  | 7.63  | 2.17 |
| Ivd              | 8.99  | 10.11 | 2.17 |
| Chid1            | 9.61  | 10.73 | 2.16 |
| Pycr1            | 10.01 | 11.12 | 2.16 |
| Kctd14           | 6.42  | 7.53  | 2.16 |
| Pnkd             | 8.42  | 9.54  | 2.16 |
| Ipp Tmem69       | 6.94  | 8.06  | 2.16 |
| Peli1            | 9.08  | 10.19 | 2.16 |
| Lig3 Rffl        | 7.78  | 8.90  | 2.16 |
| Rpl5             | 10.97 | 12.08 | 2.16 |
| Pfkfb3           | 7.51  | 8.62  | 2.16 |
| Cab39            | 9.79  | 10.90 | 2.16 |
| Noxo1            | 7.50  | 8.60  | 2.16 |
| Padi1            | 6.96  | 8.06  | 2.16 |
| Hspb1            | 12.66 | 13.77 | 2.16 |
| Gpt2             | 8.39  | 9.50  | 2.16 |
| 9130011J15Rik    | 10.13 | 11.24 | 2.15 |
| Mthfs Gm2382     | 7.17  | 8.27  | 2.15 |
| Hspa4            | 10.56 | 11.66 | 2.15 |
| Plk3             | 9.95  | 11.05 | 2.15 |
| Senp8            | 6.48  | 7.58  | 2.15 |
| Mphosph6         | 8.16  | 9.26  | 2.15 |
| Rwdd4a           | 9.30  | 10.40 | 2.15 |
| Arntl2 LOC634943 | 8.49  | 9.60  | 2.15 |
| Rsl1d1           | 10.11 | 11.21 | 2.15 |
| Bmp2             | 5.59  | 6.69  | 2.15 |
| Hsd1l            | 8.33  | 9.43  | 2.15 |
| Gtf2e2           | 7.96  | 9.06  | 2.14 |
| Plch1            | 5.94  | 7.04  | 2.14 |
| Capza1           | 11.07 | 12.17 | 2.14 |

|               |       |       |      |
|---------------|-------|-------|------|
| Pnpla2        | 9.19  | 10.29 | 2.14 |
| Tmem43        | 12.07 | 13.16 | 2.14 |
| Strbp         | 7.93  | 9.03  | 2.14 |
| Mir200b       | 5.56  | 6.66  | 2.14 |
| 2610002M06Rik | 8.30  | 9.40  | 2.14 |
| Cdc14b        | 8.10  | 9.19  | 2.14 |
| Eef1b2        | 11.79 | 12.88 | 2.14 |
| Unc13d        | 7.16  | 8.25  | 2.14 |
| Pard3         | 8.88  | 9.98  | 2.14 |
| Pcdhb2        | 5.84  | 6.93  | 2.14 |
| Vta1          | 9.63  | 10.72 | 2.14 |
| Cpt2          | 9.56  | 10.66 | 2.14 |
| Myo10         | 8.89  | 9.98  | 2.14 |
| Rnpep         | 9.88  | 10.98 | 2.13 |
| Pon2          | 8.37  | 9.46  | 2.13 |
| Dctn6         | 10.40 | 11.50 | 2.13 |
| Fam123b       | 7.92  | 9.02  | 2.13 |
| Jph1          | 7.19  | 8.29  | 2.13 |
| Smyd2         | 9.29  | 10.38 | 2.13 |
| Sub1          | 9.97  | 11.06 | 2.13 |
| Trpv3         | 6.70  | 7.79  | 2.13 |
| 4931406C07Rik | 8.75  | 9.84  | 2.13 |
| Atg10         | 8.43  | 9.52  | 2.13 |
| Rad9b         | 7.53  | 8.62  | 2.13 |
| Shq1          | 8.18  | 9.27  | 2.13 |
| Tprgl         | 10.20 | 11.29 | 2.13 |
| Myo1d         | 9.85  | 10.94 | 2.13 |
| Hscb          | 7.41  | 8.50  | 2.13 |
| Cdkn2aipnl    | 11.18 | 12.27 | 2.13 |
| Fam114a2      | 8.24  | 9.33  | 2.13 |
| Lrrc32        | 6.72  | 7.81  | 2.13 |
| Zfp637        | 8.63  | 9.71  | 2.13 |
| Stox2         | 6.82  | 7.91  | 2.13 |
| Hist1h1c      | 10.08 | 11.17 | 2.13 |
| Copb1         | 9.82  | 10.91 | 2.12 |
| Dars          | 9.09  | 10.17 | 2.12 |
| Slc2a1        | 11.66 | 12.74 | 2.12 |
| 8430410K20Rik | 8.89  | 9.97  | 2.12 |
| C1galt1       | 9.18  | 10.27 | 2.12 |
| Gramd1c       | 6.63  | 7.72  | 2.12 |
| 3110043O21Rik | 6.79  | 7.88  | 2.12 |
| Crot          | 9.36  | 10.45 | 2.12 |
| Mtpn          | 10.65 | 11.74 | 2.12 |
| Ddx47         | 9.10  | 10.18 | 2.12 |
| Tmem63a       | 10.73 | 11.82 | 2.12 |
| Nae1          | 9.78  | 10.87 | 2.12 |
| Tcf20         | 10.01 | 11.09 | 2.12 |
| 9-Mar         | 7.99  | 9.07  | 2.12 |
| Eppk1         | 7.51  | 8.59  | 2.12 |
| Cyb561        | 8.00  | 9.08  | 2.12 |
| 2610028A01Rik | 8.14  | 9.22  | 2.12 |
| Atxn3         | 8.05  | 9.13  | 2.12 |
| Ublcp1        | 8.03  | 9.12  | 2.12 |
| Gnl3l         | 9.18  | 10.26 | 2.12 |
| Eef2k         | 7.83  | 8.91  | 2.12 |

|                    |       |       |      |
|--------------------|-------|-------|------|
| Uchl5              | 8.29  | 9.37  | 2.11 |
| H3f3a              | 10.48 | 11.56 | 2.11 |
| Zfp750             | 9.82  | 10.89 | 2.11 |
| Mrpl32             | 8.21  | 9.29  | 2.11 |
| Psm6               | 9.57  | 10.65 | 2.11 |
| Rab4a              | 8.17  | 9.24  | 2.11 |
| Nsun2              | 8.52  | 9.60  | 2.11 |
| Chmp1a             | 11.00 | 12.07 | 2.11 |
| Gtf2f2             | 8.18  | 9.26  | 2.11 |
| Tmem167b           | 9.62  | 10.69 | 2.11 |
| Tdg Gm5806         | 9.17  | 10.24 | 2.11 |
| 2810004N23Rik Gnpa |       |       |      |
| t                  | 7.91  | 8.98  | 2.11 |
| Slc39a10           | 8.12  | 9.19  | 2.11 |
| S100a3             | 8.48  | 9.56  | 2.10 |
| Asl                | 8.69  | 9.77  | 2.10 |
| Adi1               | 10.21 | 11.29 | 2.10 |
| 2810047C21Rik1     | 7.39  | 8.46  | 2.10 |
| Trim33             | 9.15  | 10.23 | 2.10 |
| Olf1314            | 5.28  | 6.35  | 2.10 |
| Zc3h12a            | 8.32  | 9.39  | 2.10 |
| Evpl               | 7.72  | 8.79  | 2.10 |
| Ttpa               | 6.33  | 7.41  | 2.10 |
| Mex3b              | 8.05  | 9.12  | 2.10 |
| Uap1               | 8.97  | 10.04 | 2.10 |
| Commd6             | 9.51  | 10.58 | 2.10 |
| Mtap               | 9.36  | 10.43 | 2.10 |
| Ccnj               | 6.90  | 7.96  | 2.10 |
| Cebpg              | 8.84  | 9.91  | 2.10 |
| Cct5               | 10.02 | 11.09 | 2.09 |
| Ddx19a             | 9.46  | 10.52 | 2.09 |
| Hspe1 Hspe1-rs1    | 10.78 | 11.85 | 2.09 |
| Nme7               | 7.59  | 8.65  | 2.09 |
| Mrpl9              | 8.76  | 9.83  | 2.09 |
| Ophn1              | 5.90  | 6.97  | 2.09 |
| Ppargc1a           | 5.55  | 6.61  | 2.09 |
| Rasa4              | 7.96  | 9.02  | 2.09 |
| Moxd1              | 6.32  | 7.38  | 2.09 |
| Tmem97             | 8.74  | 9.81  | 2.09 |
| Rab3d              | 9.45  | 10.52 | 2.09 |
| Tgfa               | 9.05  | 10.11 | 2.09 |
| Zc4h2              | 8.72  | 9.78  | 2.09 |
| Snx6               | 9.60  | 10.66 | 2.09 |
| D16Ert472e         | 8.36  | 9.42  | 2.09 |
| Ccnc               | 8.25  | 9.31  | 2.09 |
| Frrs1              | 11.26 | 12.33 | 2.09 |
| Adamtsl4           | 9.51  | 10.57 | 2.09 |
| Pcmd2              | 8.21  | 9.27  | 2.09 |
| Dock7              | 8.91  | 9.97  | 2.08 |
| Shroom1            | 7.07  | 8.13  | 2.08 |
| Cops7a             | 11.39 | 12.45 | 2.08 |
| 1500011K16Rik      | 6.81  | 7.87  | 2.08 |
| Gcnt3              | 6.44  | 7.49  | 2.08 |
| Uqcrh              | 10.73 | 11.79 | 2.08 |
| Ehd4               | 10.51 | 11.56 | 2.08 |

|                   |       |       |      |
|-------------------|-------|-------|------|
| Calm2             | 10.02 | 11.07 | 2.08 |
| Rfwd2             | 8.71  | 9.76  | 2.07 |
| Pax9              | 7.25  | 8.30  | 2.07 |
| Socs2             | 8.16  | 9.22  | 2.07 |
| Dedd              | 9.14  | 10.19 | 2.07 |
| Egln3             | 10.23 | 11.29 | 2.07 |
| H3f3a             | 10.85 | 11.90 | 2.07 |
| Pik3r3            | 8.28  | 9.34  | 2.07 |
| L3mbtl3           | 7.61  | 8.66  | 2.07 |
| Lrrc61            | 8.10  | 9.15  | 2.07 |
| Gabrb3            | 6.62  | 7.67  | 2.07 |
| Tirap             | 9.34  | 10.39 | 2.07 |
| 0610007P14Rik     | 11.62 | 12.67 | 2.07 |
| Fam185a           | 7.32  | 8.37  | 2.07 |
| Cnksr2            | 5.37  | 6.42  | 2.07 |
| Nudt12            | 7.57  | 8.62  | 2.07 |
| Rpl5              | 10.91 | 11.95 | 2.07 |
| Max               | 9.91  | 10.96 | 2.07 |
| Lrrc51            | 7.83  | 8.88  | 2.07 |
| Fem1b             | 9.36  | 10.41 | 2.07 |
| Gpc1              | 7.85  | 8.90  | 2.07 |
| Inpp5a            | 9.47  | 10.52 | 2.06 |
| Ccdc112           | 7.63  | 8.67  | 2.06 |
| Prkrir            | 8.29  | 9.33  | 2.06 |
| Hemk1             | 7.18  | 8.22  | 2.06 |
| Atl2              | 8.02  | 9.06  | 2.06 |
| Timm8a1           | 7.03  | 8.08  | 2.06 |
| Alg1 Fam86        | 7.83  | 8.87  | 2.06 |
| Rbmxrt            | 10.35 | 11.39 | 2.06 |
| Asnsd1            | 10.41 | 11.45 | 2.06 |
| Blmh              | 8.61  | 9.65  | 2.06 |
| Sh3d20            | 9.31  | 10.35 | 2.05 |
| Timm8a1           | 7.46  | 8.49  | 2.05 |
| Nkiras2 Zfp385c   | 9.62  | 10.65 | 2.05 |
| 1200016B10Rik     | 7.12  | 8.16  | 2.05 |
| Uprt              | 9.97  | 11.01 | 2.05 |
| Fam100a           | 9.69  | 10.73 | 2.05 |
| Myo1d             | 10.52 | 11.56 | 2.05 |
| Ola1              | 9.06  | 10.10 | 2.05 |
| Rab32             | 8.52  | 9.56  | 2.05 |
| Dlg1 LOC100047603 | 10.72 | 11.76 | 2.05 |
| Ptges             | 7.24  | 8.28  | 2.05 |
| 4930486G11Rik     | 5.86  | 6.89  | 2.05 |
| Ndufc2            | 10.56 | 11.60 | 2.05 |
| Tomm40            | 9.28  | 10.31 | 2.05 |
| Rnf5              | 9.42  | 10.46 | 2.05 |
| H3f3a             | 10.81 | 11.84 | 2.05 |
| Gcnt2             | 9.59  | 10.62 | 2.05 |
| Mios              | 7.17  | 8.21  | 2.05 |
| Shpk              | 8.08  | 9.11  | 2.05 |
| Psma5             | 9.15  | 10.18 | 2.05 |
| Akr1b3 Gm6644     | 10.54 | 11.57 | 2.05 |
| Nedd4l            | 9.83  | 10.86 | 2.05 |
| Rlim              | 9.25  | 10.29 | 2.05 |
| Fgyy              | 8.13  | 9.16  | 2.04 |



|               |       |       |      |
|---------------|-------|-------|------|
| Lactb2        | 8.33  | 9.36  | 2.04 |
| Slc44a2       | 10.51 | 11.54 | 2.04 |
| 4933429F08Rik | 6.19  | 7.22  | 2.04 |
| Iffo2         | 8.52  | 9.55  | 2.04 |
| Dbi           | 11.54 | 12.57 | 2.04 |
| Cstf3         | 5.61  | 6.64  | 2.04 |
| Agps          | 8.43  | 9.46  | 2.04 |
| Kras          | 8.59  | 9.62  | 2.04 |
| D730005E14Rik | 7.95  | 8.98  | 2.04 |
| Tmem97        | 10.24 | 11.27 | 2.04 |
| Plch2         | 7.97  | 8.99  | 2.04 |
| Eif2s1        | 10.46 | 11.49 | 2.04 |
| Higd2a        | 11.85 | 12.88 | 2.04 |
| Nup210l       | 6.51  | 7.54  | 2.04 |
| Pi4k2a        | 9.70  | 10.73 | 2.04 |
| Zfp608        | 7.42  | 8.45  | 2.04 |
| 4930506M07Rik | 6.12  | 7.15  | 2.04 |
| 6230409E13Rik | 7.42  | 8.45  | 2.04 |
| Kctd3         | 7.81  | 8.83  | 2.04 |
| Ube2a         | 9.49  | 10.52 | 2.04 |
| Hsd17b12      | 9.11  | 10.14 | 2.04 |
| G6pc3         | 10.12 | 11.14 | 2.04 |
| Ptgfrn        | 8.41  | 9.44  | 2.04 |
| Cav1          | 11.45 | 12.47 | 2.04 |
| Ptpn6         | 7.67  | 8.69  | 2.03 |
| Rab27a        | 6.28  | 7.30  | 2.03 |
| Pdcd5         | 10.81 | 11.83 | 2.03 |
| Atp5s         | 7.66  | 8.69  | 2.03 |
| Eif3m         | 8.43  | 9.45  | 2.03 |
| Pex19         | 9.70  | 10.72 | 2.03 |
| Socs6         | 8.41  | 9.44  | 2.03 |
| Ubn2          | 8.13  | 9.15  | 2.03 |
| Pcgf1         | 8.30  | 9.32  | 2.03 |
| Cyp20a1       | 9.12  | 10.14 | 2.03 |
| Gtf2b         | 8.74  | 9.76  | 2.03 |
| Pdlim5        | 10.61 | 11.63 | 2.03 |
| Ephb4         | 9.33  | 10.35 | 2.03 |
| Acox2         | 6.36  | 7.38  | 2.03 |
| Ppp3r1        | 9.20  | 10.22 | 2.03 |
| Hivep2        | 7.65  | 8.67  | 2.03 |
| Gm6644 Akr1b3 | 10.64 | 11.66 | 2.03 |
| Adora2b       | 7.59  | 8.60  | 2.03 |
| Jagn1         | 10.04 | 11.06 | 2.03 |
| Insig1        | 9.79  | 10.81 | 2.02 |
| Hgfac         | 6.87  | 7.89  | 2.02 |
| Pgm2          | 9.65  | 10.67 | 2.02 |
| Vti1b Arg2    | 8.51  | 9.53  | 2.02 |
| Mff           | 9.66  | 10.68 | 2.02 |
| Chd7          | 7.50  | 8.51  | 2.02 |
| Btf3l4        | 9.80  | 10.82 | 2.02 |
| Rbmxt         | 10.29 | 11.31 | 2.02 |
| Ppp2r5e       | 8.65  | 9.66  | 2.02 |
| Gm6644 Akr1b3 | 10.54 | 11.55 | 2.02 |
| Rpl5          | 10.48 | 11.49 | 2.02 |
| Vps26b        | 9.78  | 10.79 | 2.02 |

|                       |       |       |       |
|-----------------------|-------|-------|-------|
| 1110067D22Rik         | 9.22  | 10.23 | 2.02  |
| Hoxc4                 | 6.47  | 7.49  | 2.02  |
| Palld                 | 7.39  | 8.41  | 2.02  |
| Tmf1                  | 8.48  | 9.49  | 2.02  |
| Limd1                 | 8.83  | 9.84  | 2.02  |
| Acsl4                 | 8.75  | 9.76  | 2.02  |
| Pgk1                  | 11.79 | 12.81 | 2.02  |
| Pgk1                  | 11.79 | 12.81 | 2.02  |
| Rarres1 Gm8515        | 8.31  | 9.32  | 2.02  |
| Gm13375               | 7.77  | 8.78  | 2.01  |
| Minpp1                | 8.83  | 9.84  | 2.01  |
| Ptdss1                | 9.68  | 10.69 | 2.01  |
| Ints12                | 9.84  | 10.85 | 2.01  |
| Gm10784               | 7.75  | 8.76  | 2.01  |
| Gabarapl2             | 6.21  | 7.22  | 2.01  |
| Lypd6b                | 6.83  | 7.84  | 2.01  |
| Abhd5                 | 9.60  | 10.60 | 2.01  |
| Armc9                 | 7.82  | 8.82  | 2.01  |
| Cib2 Sh2d7            | 7.49  | 8.49  | 2.01  |
| 1110008P14Rik         | 9.13  | 10.14 | 2.01  |
| 2210403K04Rik Mir22   | 7.79  | 8.80  | 2.01  |
| Net1                  | 9.22  | 10.22 | 2.01  |
| Echdc1                | 8.93  | 9.93  | 2.01  |
| Myst1 Prss8           | 8.04  | 9.05  | 2.01  |
| Mettl2                | 9.20  | 10.21 | 2.01  |
| Dctd                  | 10.64 | 11.65 | 2.01  |
| 9030420J04Rik         | 8.26  | 9.27  | 2.01  |
| Gm3771                | 8.68  | 9.69  | 2.01  |
| Camsap11i             | 9.75  | 10.75 | 2.00  |
| Grxcr1                | 8.24  | 9.25  | 2.00  |
| Hspe1 Hspe1-rs1       | 10.79 | 11.79 | 2.00  |
| Hlcs                  | 7.77  | 8.77  | 2.00  |
| Stx7                  | 8.93  | 9.93  | 2.00  |
| Anxa6                 | 10.45 | 11.45 | 2.00  |
| Tmem56                | 5.21  | 6.22  | 2.00  |
| Nebi                  | 6.75  | 7.75  | 2.00  |
| Irx2                  | 7.60  | 8.60  | 2.00  |
| Gm9853                | 7.46  | 8.46  | 2.00  |
| Ap1g1                 | 10.16 | 11.16 | 2.00  |
| Hist1h2ao Gm11276     |       |       |       |
| Hist1h2ae Hist1h2an   |       |       |       |
| Hist1h2af Hist1h2ad H |       |       |       |
| ist1h2ag Hist1h2ah Hi |       |       |       |
| st1h2ai Hist1h2ak     | 13.86 | 12.86 | -2.00 |
| H2afv                 | 12.06 | 11.06 | -2.00 |
|                       | 13.15 | 12.15 | -2.00 |
| Sdhb                  | 10.38 | 9.38  | -2.00 |
| 9630013D21Rik         | 6.68  | 5.68  | -2.00 |
| 4932438A13Rik         | 8.85  | 7.85  | -2.00 |
| Recql4 Mfsd3          | 8.17  | 7.16  | -2.01 |

|                        |       |       |       |
|------------------------|-------|-------|-------|
| Gm11276 Hist1h2an      |       |       |       |
| Hist1h2af Hist1h2ao H  |       |       |       |
| ist1h2ai Hist1h2ad His |       |       |       |
| t1h2ag Hist1h2ah Hist  |       |       |       |
| 1h2ak                  | 13.85 | 12.85 | -2.01 |
| Fgfbp3                 | 8.91  | 7.91  | -2.01 |
| Cpsf3 Pusl1            | 11.23 | 10.22 | -2.01 |
| Ptpla                  | 8.10  | 7.09  | -2.01 |
| Acap3                  | 8.83  | 7.82  | -2.01 |
| Gpr77                  | 7.96  | 6.95  | -2.01 |
| Wdr90                  | 8.29  | 7.28  | -2.01 |
| Zfp346                 | 9.84  | 8.84  | -2.01 |
| Dusp1                  | 12.99 | 11.98 | -2.01 |
| D330041H03Rik          | 6.76  | 5.75  | -2.01 |
| Fam13c Phyhipl         | 7.81  | 6.81  | -2.01 |
| Hip1                   | 9.74  | 8.74  | -2.01 |
| Ccdc141                | 7.27  | 6.26  | -2.01 |
| Foxf1a                 | 8.68  | 7.67  | -2.01 |
| Tspan32                | 7.39  | 6.38  | -2.01 |
| Arfgef2                | 10.31 | 9.30  | -2.01 |
| Emx2                   | 7.36  | 6.35  | -2.01 |
| Hist1h2af Hist1h2ao G  |       |       |       |
| m11276 Hist1h2an Hi    |       |       |       |
| st1h2ad Hist1h2ah His  |       |       |       |
| t1h2ai Hist1h2ak       | 13.98 | 12.97 | -2.02 |
| Mdm2                   | 12.87 | 11.86 | -2.02 |
| Ankrd12                | 9.19  | 8.18  | -2.02 |
| Sirt1                  | 8.50  | 7.49  | -2.02 |
| Col5a2                 | 7.87  | 6.86  | -2.02 |
| Hist1h2ao Gm11276      |       |       |       |
| Hist1h2ai Hist1h2ad H  |       |       |       |
| ist1h2ah               | 14.00 | 12.99 | -2.02 |
| Smad1                  | 9.59  | 8.57  | -2.02 |
| S100a13                | 9.46  | 8.44  | -2.02 |
| Csf1                   | 11.01 | 10.00 | -2.02 |
| Tns1                   | 10.23 | 9.21  | -2.02 |
| Hist3h2bb              | 8.89  | 7.88  | -2.02 |
| Hist1h2ao Gm11276      |       |       |       |
| Hist1h2an Hist1h2af H  |       |       |       |
| ist1h2ad Hist1h2ah Hi  |       |       |       |
| st1h2ai Hist1h2ak      | 13.88 | 12.87 | -2.02 |
| Lgmn                   | 12.12 | 11.11 | -2.02 |
| Hist1h2ao Gm11276      |       |       |       |
| Hist1h2an Hist1h2af H  |       |       |       |
| ist1h2ag Hist1h2ad Hi  |       |       |       |
| st1h2ah Hist1h2ai Hist |       |       |       |
| 1h2ak                  | 13.85 | 12.84 | -2.02 |
| Med13l                 | 10.84 | 9.83  | -2.02 |
| Cep192                 | 9.43  | 8.41  | -2.02 |
| Spc25                  | 9.36  | 8.34  | -2.02 |
|                        | 6.88  | 5.86  | -2.02 |
| Cenpe                  | 8.80  | 7.78  | -2.03 |
| Armcx1                 | 7.56  | 6.55  | -2.03 |

|                       |       |       |       |
|-----------------------|-------|-------|-------|
| Bcl2l11               | 9.13  | 8.12  | -2.03 |
| Bahcc1                | 8.45  | 7.43  | -2.03 |
| Hist1h2ao Gm11276     |       |       |       |
| Hist1h2an Hist1h2af H |       |       |       |
| ist1h2ad Hist1h2ah Hi |       |       |       |
| st1h2ai Hist1h2ak     | 13.97 | 12.95 | -2.03 |
| Rere                  | 10.43 | 9.41  | -2.03 |
| Slc27a3               | 7.90  | 6.88  | -2.03 |
| Vps13d                | 9.08  | 8.06  | -2.03 |
| Ctso                  | 9.81  | 8.79  | -2.03 |
| Arl4a                 | 7.77  | 6.75  | -2.03 |
| Hnrmpd                | 10.12 | 9.10  | -2.03 |
| Hist1h2ao Gm11276     |       |       |       |
| Hist1h2ac Hist1h2an   |       |       |       |
| Hist1h2af Hist1h2ah H |       |       |       |
| ist1h2ad Hist1h2ag Hi |       |       |       |
| st1h2ai Hist1h2ak     | 13.97 | 12.94 | -2.03 |
| Rhob                  | 10.57 | 9.54  | -2.03 |
| Adam33                | 8.61  | 7.58  | -2.04 |
| Ii20rb                | 8.93  | 7.90  | -2.04 |
| Trnp1                 | 10.54 | 9.51  | -2.04 |
| Pcgf5                 | 8.73  | 7.70  | -2.04 |
| Trim56                | 10.65 | 9.62  | -2.04 |
| B3galt1               | 6.90  | 5.87  | -2.04 |
| Abcb1b                | 9.81  | 8.78  | -2.04 |
| Slc39a14              | 9.28  | 8.25  | -2.04 |
| Trim37                | 9.94  | 8.91  | -2.04 |
| Parp14                | 9.55  | 8.52  | -2.04 |
| Fes                   | 8.38  | 7.35  | -2.04 |
| Gstt3                 | 8.48  | 7.45  | -2.04 |
| Hist2h2aa1 Hist2h2ac  |       |       |       |
| Hist2h2aa2 Hist2h3c1  |       |       |       |
| Fam124a               | 13.65 | 12.62 | -2.04 |
| Foxred2               | 8.81  | 7.78  | -2.05 |
| Foxred2               | 8.12  | 7.08  | -2.05 |
| A630089N07Rik         | 10.72 | 9.68  | -2.05 |
| Hmcn1                 | 6.89  | 5.86  | -2.05 |
| Dst                   | 9.51  | 8.48  | -2.05 |
| Trim46                | 8.26  | 7.22  | -2.05 |
| Gkap1                 | 7.30  | 6.27  | -2.05 |
| Snora31               | 7.98  | 6.95  | -2.05 |
| Pyroxd2               | 7.58  | 6.55  | -2.05 |
| Chst14                | 10.71 | 9.68  | -2.05 |
| Pkmyt1 Paqr4          | 10.27 | 9.23  | -2.05 |
| Exosc10               | 11.49 | 10.45 | -2.06 |
| Pld4                  | 7.21  | 6.17  | -2.06 |
| 4932438A13Rik         | 8.55  | 7.51  | -2.06 |
| Zfp763                | 6.66  | 5.62  | -2.06 |
|                       | 9.43  | 8.38  | -2.06 |
| Shmt1                 | 9.43  | 8.39  | -2.06 |
| Rpa1                  | 10.82 | 9.78  | -2.06 |
| Enpp2                 | 7.27  | 6.23  | -2.06 |

|                         |       |       |       |
|-------------------------|-------|-------|-------|
| Hist1h2be Hist1h2bn     |       |       |       |
| Hist1h2bk Hist1h2bg     |       |       |       |
| Hist1h2bl Hist1h2bh H   |       |       |       |
| ist1h2bj Hist1h2bf Hist |       |       |       |
| 1h2bm Hist1h2bp         | 13.62 | 12.57 | -2.06 |
| Snora23                 | 11.39 | 10.34 | -2.06 |
| Hspa12b                 | 7.83  | 6.78  | -2.06 |
| Pkd2l2 Fam13b           | 9.00  | 7.96  | -2.06 |
| Zmym6 Gm12942           | 8.61  | 7.56  | -2.06 |
| Cd200                   | 6.83  | 5.78  | -2.06 |
| Bok                     | 9.19  | 8.15  | -2.06 |
| Onecut2                 | 8.92  | 7.88  | -2.06 |
| Mdm1                    | 8.38  | 7.34  | -2.07 |
| Gpsm3                   | 8.77  | 7.72  | -2.07 |
| Lrrn4                   | 7.69  | 6.65  | -2.07 |
| 2610005L07Rik 6820      |       |       |       |
| 431F20Rik A430108E      |       |       |       |
| 01Rik                   | 10.39 | 9.35  | -2.07 |
| Scarna13                | 11.44 | 10.39 | -2.07 |
| Tinagl1                 | 13.11 | 12.07 | -2.07 |
| Rtn4rl1                 | 8.03  | 6.98  | -2.07 |
| Angptl6 A230050P20      |       |       |       |
| Rik                     | 8.46  | 7.41  | -2.07 |
| Zfp580                  | 8.28  | 7.23  | -2.07 |
| lkbip                   | 9.61  | 8.56  | -2.07 |
| Dnmt1                   | 11.22 | 10.17 | -2.07 |
| Anks6                   | 7.44  | 6.38  | -2.07 |
| Cyp1b1 1700038P13       |       |       |       |
| Rik                     | 10.08 | 9.03  | -2.08 |
| Sox5                    | 7.95  | 6.90  | -2.08 |
| 2610203C20Rik           | 8.14  | 7.08  | -2.08 |
| Ahi1                    | 7.57  | 6.51  | -2.08 |
| Muc16                   | 7.73  | 6.67  | -2.08 |
| Acer2                   | 9.03  | 7.97  | -2.08 |
| Sfxn4                   | 6.90  | 5.84  | -2.08 |
| Tll1                    | 7.55  | 6.50  | -2.08 |
| Rab36                   | 7.42  | 6.37  | -2.08 |
| Gm10808                 | 6.65  | 5.59  | -2.08 |
| Gjc1                    | 8.58  | 7.52  | -2.08 |
| Cmb1                    | 8.32  | 7.26  | -2.08 |
| Vegfb                   | 10.77 | 9.71  | -2.08 |
|                         | 9.00  | 7.94  | -2.08 |
| Ifi47 Olf1r56           | 6.44  | 5.39  | -2.08 |
| Gal3st2 Gm6086          | 7.21  | 6.15  | -2.08 |
| Trdn                    | 6.57  | 5.51  | -2.08 |
| Neurl1B                 | 9.33  | 8.27  | -2.08 |
|                         | 10.68 | 9.62  | -2.08 |
| Tor1aip1 Tor1aip2       | 9.35  | 8.29  | -2.09 |
| Sema3a                  | 7.07  | 6.01  | -2.09 |
| Rif1                    | 9.34  | 8.28  | -2.09 |
| Xylb                    | 8.57  | 7.51  | -2.09 |
|                         | 9.06  | 8.00  | -2.09 |

|                                                                      |       |       |       |
|----------------------------------------------------------------------|-------|-------|-------|
| Ott Gm15085 Gm15127 OTTMUSG00000019001 Luzp4 Gm15097 Gm15091 Gm15128 |       |       |       |
| Gm10439                                                              | 7.29  | 6.23  | -2.09 |
| Syngap1                                                              | 8.57  | 7.51  | -2.09 |
| Helq                                                                 | 8.86  | 7.80  | -2.09 |
| Susd2                                                                | 8.46  | 7.40  | -2.09 |
| Rapgef2                                                              | 9.79  | 8.73  | -2.09 |
| Pnp                                                                  | 11.78 | 10.72 | -2.09 |
| Mtss1l                                                               | 8.75  | 7.68  | -2.09 |
| Luzp4 Ott Gm15085 Gm15127 OTTMUSG00000019001 Gm15128 Gm10439 Gm15097 |       |       |       |
| Gm15091                                                              | 7.16  | 6.09  | -2.09 |
| Ppp2r5d                                                              | 11.01 | 9.94  | -2.10 |
| Csrnp1                                                               | 8.84  | 7.77  | -2.10 |
| Samd5                                                                | 8.99  | 7.92  | -2.10 |
| Fam122b                                                              | 8.96  | 7.89  | -2.10 |
| Zfp456                                                               | 7.86  | 6.79  | -2.10 |
|                                                                      | 8.53  | 7.46  | -2.10 |
| Cntnap5a                                                             | 7.41  | 6.34  | -2.10 |
| 1600002H07Rik                                                        | 9.68  | 8.61  | -2.10 |
| Cxxc5                                                                | 9.28  | 8.20  | -2.10 |
| Dagla                                                                | 8.75  | 7.68  | -2.10 |
| 2610005L07Rik 6820                                                   |       |       |       |
| 431F20Rik                                                            | 11.77 | 10.70 | -2.10 |
| Micall1                                                              | 9.65  | 8.57  | -2.10 |
| Ogfr                                                                 | 11.21 | 10.14 | -2.10 |
| Kcnj3                                                                | 7.33  | 6.25  | -2.11 |
| Smarcd3 Chpf2                                                        | 7.78  | 6.70  | -2.11 |
| H2-M3                                                                | 8.76  | 7.69  | -2.11 |
| Reep1                                                                | 7.67  | 6.60  | -2.11 |
| 4930518l15Rik                                                        | 7.76  | 6.69  | -2.11 |
| Sfrs4                                                                | 10.31 | 9.23  | -2.11 |
| Slbp                                                                 | 10.07 | 8.99  | -2.11 |
| Bicc1                                                                | 8.08  | 7.00  | -2.11 |
| Ott Gm15085 Gm15127 OTTMUSG00000019001 Luzp4 Gm15097 Gm15091 Gm10439 |       |       |       |
| Gm15128                                                              | 7.31  | 6.23  | -2.11 |
| Apaf1                                                                | 10.55 | 9.47  | -2.11 |
| Gm4980                                                               | 9.00  | 7.92  | -2.11 |
| Lrwd1                                                                | 10.44 | 9.36  | -2.11 |
| 6820431F20Rik 2610005L07Rik A430108E                                 |       |       |       |
| 01Rik                                                                | 12.01 | 10.93 | -2.11 |
| Snord95                                                              | 8.84  | 7.76  | -2.11 |
| Prss23                                                               | 10.60 | 9.52  | -2.12 |
| Epb4.1l2                                                             | 10.11 | 9.03  | -2.12 |
| Mad2l2                                                               | 10.23 | 9.15  | -2.12 |
| Snx21 Acot8                                                          | 9.35  | 8.27  | -2.12 |
| Sdc2                                                                 | 10.37 | 9.29  | -2.12 |

|                        |       |       |       |
|------------------------|-------|-------|-------|
| Fen1 Gm10143           | 9.86  | 8.77  | -2.12 |
| Kcnd1                  | 7.56  | 6.48  | -2.12 |
| Anpep                  | 8.01  | 6.93  | -2.12 |
|                        | 7.36  | 6.27  | -2.12 |
| X99384                 | 8.35  | 7.27  | -2.12 |
| Nppb                   | 7.73  | 6.65  | -2.12 |
| Sema6b                 | 8.41  | 7.32  | -2.12 |
| Sema6b                 | 8.41  | 7.32  | -2.12 |
|                        | 11.85 | 10.76 | -2.12 |
| Mapk4                  | 7.97  | 6.88  | -2.12 |
| Dennd5a                | 10.57 | 9.48  | -2.12 |
| Pkp4                   | 9.85  | 8.77  | -2.12 |
| Rsph9                  | 7.74  | 6.65  | -2.12 |
|                        | 9.13  | 8.04  | -2.13 |
| Tbxa2r                 | 8.48  | 7.39  | -2.13 |
| Hist1h2an Hist1h2ao    |       |       |       |
| Gm11276 Hist1h2af H    |       |       |       |
| ist1h2ag Hist1h2ad Hi  |       |       |       |
| st1h2ah Hist1h2ai Hist |       |       |       |
| 1h2ak                  | 13.89 | 12.80 | -2.13 |
| Ift80                  | 8.75  | 7.66  | -2.13 |
| Fam176b                | 8.91  | 7.81  | -2.13 |
| Igfbp4                 | 7.84  | 6.75  | -2.13 |
|                        | 10.81 | 9.72  | -2.13 |
| Ak1                    | 11.84 | 10.75 | -2.13 |
|                        | 10.81 | 9.72  | -2.13 |
| Rapsn                  | 7.70  | 6.61  | -2.13 |
| Yars                   | 11.04 | 9.95  | -2.13 |
| 2310001H12Rik LOC      |       |       |       |
| 100044193 LOC1000      |       |       |       |
| 45081                  | 9.18  | 8.08  | -2.13 |
| Arfgef2                | 9.89  | 8.80  | -2.13 |
| Hivep3                 | 8.85  | 7.75  | -2.13 |
| Hlx                    | 8.43  | 7.34  | -2.14 |
| Arsa                   | 9.60  | 8.51  | -2.14 |
| Zdhhc2                 | 8.48  | 7.39  | -2.14 |
| Hmcn1                  | 7.09  | 5.99  | -2.14 |
| Klf4                   | 10.59 | 9.49  | -2.14 |
|                        | 7.80  | 6.70  | -2.14 |
| Gnptg                  | 10.26 | 9.16  | -2.14 |
| Tsc22d2                | 10.40 | 9.30  | -2.14 |
|                        | 6.16  | 5.06  | -2.14 |
| Dennd5b                | 7.01  | 5.91  | -2.14 |
| Itga2b                 | 8.58  | 7.48  | -2.15 |
|                        | 11.57 | 10.46 | -2.15 |
|                        | 10.63 | 9.52  | -2.15 |
| Fanca                  | 9.24  | 8.13  | -2.15 |
| Adcy6                  | 9.79  | 8.69  | -2.15 |
| Casp12                 | 9.71  | 8.61  | -2.15 |
| Trim6                  | 7.45  | 6.35  | -2.15 |
| Ampd3                  | 10.97 | 9.86  | -2.15 |
| Gns                    | 11.71 | 10.61 | -2.15 |
| Lpin1                  | 10.48 | 9.37  | -2.15 |
| 4922501C03Rik          | 8.64  | 7.53  | -2.15 |
| Anapc11                | 10.74 | 9.64  | -2.15 |

|                    |       |       |       |
|--------------------|-------|-------|-------|
| Wdr91              | 9.70  | 8.59  | -2.15 |
| Gpr155             | 7.84  | 6.73  | -2.15 |
| Alg1 Fam86         | 11.56 | 10.46 | -2.15 |
| Cep192             | 9.17  | 8.06  | -2.16 |
| Evc2               | 8.17  | 7.06  | -2.16 |
| Camk1d             | 7.42  | 6.31  | -2.16 |
| Acot1              | 7.84  | 6.73  | -2.16 |
| Rad51ap1           | 8.09  | 6.98  | -2.16 |
| Rttm               | 8.35  | 7.24  | -2.16 |
| Syngap1            | 8.74  | 7.63  | -2.16 |
| Apbb1              | 8.19  | 7.07  | -2.16 |
| Pisd-ps1 Pisd-ps3  | 10.90 | 9.79  | -2.16 |
| Smpd3              | 8.08  | 6.96  | -2.16 |
| Cdkn2d Gm4694      | 9.08  | 7.97  | -2.16 |
| Peli2              | 8.45  | 7.33  | -2.16 |
|                    | 7.68  | 6.57  | -2.16 |
| Ott Gm15085 Gm151  |       |       |       |
| 27 OTTMUSG000000   |       |       |       |
| 19001 Luzp4 Gm1509 |       |       |       |
| 7 Gm15128 Gm15091  |       |       |       |
| Gm10439            | 7.38  | 6.27  | -2.17 |
| Zbtb8a             | 9.15  | 8.04  | -2.17 |
| Hmcn1              | 7.80  | 6.69  | -2.17 |
| 2310001H12Rik      | 9.68  | 8.57  | -2.17 |
|                    | 9.11  | 7.99  | -2.17 |
| Tmem150a           | 11.08 | 9.97  | -2.17 |
| Ott Gm15085 Gm151  |       |       |       |
| 27 OTTMUSG000000   |       |       |       |
| 19001 Luzp4 Gm1509 |       |       |       |
| 1 Gm15097 Gm10439  |       |       |       |
| Gm15128            | 7.17  | 6.05  | -2.17 |
| Ott Gm15085 OTTMU  |       |       |       |
| SG00000019001 Luzp |       |       |       |
| 4 Gm15127 Gm15128  |       |       |       |
| Gm15091 Gm10439    |       |       |       |
| Gm15097            | 7.38  | 6.26  | -2.17 |
| Cyp2f2             | 9.62  | 8.50  | -2.17 |
| Abhd8              | 9.66  | 8.53  | -2.18 |
| Nup160             | 10.24 | 9.12  | -2.18 |
| Brca2              | 9.13  | 8.00  | -2.18 |
| Dock5              | 9.59  | 8.47  | -2.18 |
| Znfx1              | 9.82  | 8.69  | -2.18 |
| 4932438A13Rik      | 7.75  | 6.62  | -2.18 |
| 6030499A19Rik      | 9.59  | 8.47  | -2.18 |
| Fam189b            | 8.59  | 7.47  | -2.18 |
| Ptgr1              | 9.06  | 7.94  | -2.18 |
| Coro2b             | 7.96  | 6.83  | -2.18 |
| Sykb               | 9.08  | 7.96  | -2.18 |
| Asap3              | 9.06  | 7.94  | -2.18 |
| Lypd1 Gpr39        | 8.20  | 7.08  | -2.18 |
| Kank3              | 8.36  | 7.24  | -2.18 |
| Map3k12            | 10.02 | 8.89  | -2.19 |
| Nme6 LOC100046163  |       |       |       |
| LOC100046157       | 11.05 | 9.92  | -2.19 |
| Kcnab2             | 8.29  | 7.17  | -2.19 |



|                 |       |       |       |
|-----------------|-------|-------|-------|
| Gm13154 Gm13152 |       |       |       |
| Gm13212         | 6.62  | 5.49  | -2.19 |
| Chst1           | 7.98  | 6.85  | -2.19 |
| Ifit2           | 9.38  | 8.25  | -2.19 |
| Nudc Nudc-ps1   | 9.81  | 8.68  | -2.19 |
| Grk5            | 8.47  | 7.34  | -2.19 |
| Gls2            | 8.43  | 7.30  | -2.19 |
| 4930422G04Rik   | 9.11  | 7.97  | -2.20 |
| Aldh4a1         | 9.97  | 8.83  | -2.20 |
| Dennd1a         | 9.16  | 8.03  | -2.20 |
|                 | 13.13 | 11.99 | -2.20 |
| Il2rg           | 6.96  | 5.83  | -2.20 |
| Trip6           | 10.49 | 9.36  | -2.20 |
| Hist1h2ab       | 9.94  | 8.80  | -2.20 |
| Casp8ap2        | 9.06  | 7.92  | -2.20 |
|                 | 7.76  | 6.62  | -2.20 |
| Fam38a          | 11.36 | 10.22 | -2.20 |
| Stk39           | 10.01 | 8.87  | -2.20 |
| Nrbp2           | 8.42  | 7.28  | -2.20 |
|                 | 9.67  | 8.53  | -2.20 |
| Nusap1 Oip5     | 9.91  | 8.77  | -2.20 |
|                 | 10.82 | 9.68  | -2.20 |
| Cox6a2          | 8.54  | 7.40  | -2.20 |
| Slit3           | 8.18  | 7.04  | -2.20 |
| Fam38a          | 11.30 | 10.15 | -2.21 |
| Smad6           | 8.58  | 7.44  | -2.21 |
| Nudt9           | 10.81 | 9.67  | -2.21 |
| Fam40b          | 6.94  | 5.80  | -2.21 |
| Adar            | 9.62  | 8.47  | -2.21 |
| Homer3 Ddx49    | 11.09 | 9.94  | -2.21 |
| Tacc1           | 7.58  | 6.43  | -2.21 |
| Hmcn1           | 7.66  | 6.51  | -2.21 |
| Scarna8         | 7.67  | 6.52  | -2.22 |
| 4932438A13Rik   | 9.16  | 8.01  | -2.22 |
| Gm4979 Zfp442   | 9.60  | 8.45  | -2.22 |
| Prim1           | 10.02 | 8.87  | -2.22 |
| Hist4h4         | 11.00 | 9.85  | -2.22 |
| Dck             | 10.11 | 8.96  | -2.22 |
| Pdgfra          | 7.85  | 6.70  | -2.22 |
| Tnfrsf14        | 8.51  | 7.37  | -2.22 |
| Hmcn1           | 7.59  | 6.44  | -2.22 |
| Tspo            | 12.54 | 11.39 | -2.22 |
| Il20rb          | 8.65  | 7.50  | -2.22 |
| 4930422G04Rik   | 7.76  | 6.61  | -2.22 |
| Lgals1          | 13.42 | 12.27 | -2.22 |
| Wdr8            | 10.69 | 9.54  | -2.22 |
| Dlgap5          | 9.42  | 8.26  | -2.22 |
|                 | 7.14  | 5.98  | -2.22 |
| Eda2r           | 11.00 | 9.85  | -2.23 |
| Mthfr           | 8.86  | 7.71  | -2.23 |
| Rnu73b          | 10.95 | 9.80  | -2.23 |
| Fam38a          | 11.78 | 10.63 | -2.23 |
| 1700007K13Rik   | 11.79 | 10.64 | -2.23 |
| Mical1          | 8.32  | 7.16  | -2.23 |

|                                                             |       |       |       |
|-------------------------------------------------------------|-------|-------|-------|
| Ott Gm15085 Luzp4 Gm15127 OTTMUSG0000019001 Gm15097 Gm15091 | 7.45  | 6.29  | -2.23 |
|                                                             | 9.39  | 8.23  | -2.23 |
| Chpt1                                                       | 7.87  | 6.71  | -2.23 |
| Pard3b                                                      | 8.01  | 6.85  | -2.23 |
| Cebpb                                                       | 9.44  | 8.28  | -2.23 |
| Hist1h2ba                                                   | 8.57  | 7.41  | -2.23 |
| Msh3                                                        | 8.78  | 7.62  | -2.23 |
| Trafd1                                                      | 11.87 | 10.71 | -2.24 |
| Spp1                                                        | 8.72  | 7.55  | -2.24 |
| 4932438A13Rik                                               | 9.66  | 8.49  | -2.24 |
|                                                             | 10.98 | 9.82  | -2.24 |
| Trpc1                                                       | 8.21  | 7.05  | -2.24 |
|                                                             | 10.98 | 9.82  | -2.24 |
| Pola2                                                       | 10.75 | 9.59  | -2.24 |
| Ano6                                                        | 11.23 | 10.07 | -2.24 |
| Mns1                                                        | 7.57  | 6.40  | -2.24 |
| Ccdc3                                                       | 9.00  | 7.83  | -2.24 |
| Prdx4                                                       | 9.51  | 8.34  | -2.24 |
| Hmcn1                                                       | 7.12  | 5.96  | -2.24 |
| F630048H11Rik                                               | 7.18  | 6.01  | -2.25 |
| Xrcc3                                                       | 9.65  | 8.48  | -2.25 |
| Gm5431                                                      | 6.38  | 5.21  | -2.25 |
| 2510012J08Rik                                               | 10.02 | 8.85  | -2.25 |
| Asrgl1                                                      | 8.39  | 7.22  | -2.25 |
| Depdc6 Gm9920                                               | 8.44  | 7.27  | -2.25 |
| Plk4                                                        | 9.12  | 7.95  | -2.25 |
| Gprc5b                                                      | 11.47 | 10.30 | -2.25 |
| Slbp                                                        | 10.03 | 8.86  | -2.25 |
| Stmn1                                                       | 12.34 | 11.17 | -2.25 |
| Ifi44                                                       | 11.40 | 10.23 | -2.25 |
| Oip5 Nusap1                                                 | 7.98  | 6.80  | -2.25 |
| Ndn                                                         | 7.52  | 6.35  | -2.25 |
| 4932438A13Rik                                               | 7.62  | 6.45  | -2.26 |
| Hoxb4                                                       | 7.78  | 6.61  | -2.26 |
| Hmcn1                                                       | 7.28  | 6.11  | -2.26 |
|                                                             | 7.61  | 6.43  | -2.26 |
| Arhgap6                                                     | 7.37  | 6.20  | -2.26 |
| Gm5970                                                      | 6.64  | 5.47  | -2.26 |
| Stmn1                                                       | 12.26 | 11.09 | -2.26 |
| Dtnbp1                                                      | 10.07 | 8.90  | -2.26 |
| Cdc45                                                       | 10.00 | 8.82  | -2.26 |
| Lefty1                                                      | 7.45  | 6.27  | -2.26 |
| 4833427G06Rik                                               | 8.05  | 6.87  | -2.26 |
| Prkce                                                       | 8.72  | 7.54  | -2.26 |
| Hpvc-ps                                                     | 8.20  | 7.02  | -2.26 |
| Itga1                                                       | 7.10  | 5.92  | -2.27 |
| Tspyl2                                                      | 9.88  | 8.70  | -2.27 |
| Lmf2                                                        | 11.72 | 10.54 | -2.27 |
| Ets1                                                        | 10.12 | 8.94  | -2.27 |
| Tap2                                                        | 9.75  | 8.57  | -2.27 |
| Fas                                                         | 8.99  | 7.81  | -2.27 |
| Magee1                                                      | 7.80  | 6.62  | -2.27 |

|                     |       |       |       |
|---------------------|-------|-------|-------|
| Gm10554             | 6.34  | 5.16  | -2.27 |
| Ccdc141             | 7.18  | 6.00  | -2.27 |
| Hmcn1               | 7.23  | 6.04  | -2.27 |
|                     | 9.46  | 8.27  | -2.27 |
| Hoxa6               | 8.54  | 7.35  | -2.27 |
| Oas1f               | 7.37  | 6.19  | -2.27 |
| Snora21             | 9.12  | 7.94  | -2.27 |
| Arsj                | 7.35  | 6.17  | -2.27 |
|                     | 8.38  | 7.19  | -2.27 |
| Abcd1               | 8.78  | 7.59  | -2.28 |
| Snord14d Snord14c H |       |       |       |
| spa8                | 10.66 | 9.48  | -2.28 |
| Nqo1                | 9.46  | 8.27  | -2.28 |
| Il6ra               | 9.82  | 8.63  | -2.28 |
| Il20rb              | 8.70  | 7.51  | -2.28 |
| Gdf11               | 9.26  | 8.07  | -2.28 |
| Cd274               | 9.07  | 7.89  | -2.28 |
| Atf5 Nup62-il4i1    | 9.57  | 8.38  | -2.28 |
| Sp140 Arhgef12 C130 |       |       |       |
| 026 21Rik A530032D  |       |       |       |
| 15Rik LOC100040994  |       |       |       |
| LOC100041057        | 9.46  | 8.27  | -2.28 |
| Aurkb               | 11.53 | 10.34 | -2.28 |
|                     | 7.63  | 6.44  | -2.28 |
| Gm10796             | 8.27  | 7.08  | -2.28 |
| 4921517L17Rik       | 7.97  | 6.77  | -2.29 |
| Pkd2                | 9.72  | 8.52  | -2.29 |
| Tnfaip2             | 11.12 | 9.92  | -2.29 |
| Hist2h4             | 13.37 | 12.17 | -2.29 |
| 4930599N23Rik       | 8.17  | 6.97  | -2.29 |
| Nova1               | 6.52  | 5.32  | -2.29 |
| Adcy1               | 8.10  | 6.91  | -2.29 |
| Rras2               | 11.44 | 10.24 | -2.29 |
| OTTMUSG00000019     |       |       |       |
| 001 Luzp4 Ott Gm150 |       |       |       |
| 85 Gm15127 Gm1512   |       |       |       |
| 8 Gm15097 Gm10439   |       |       |       |
| Gm15091             | 7.43  | 6.24  | -2.29 |
| Snord14d Snord14c H |       |       |       |
| spa8                | 10.66 | 9.46  | -2.29 |
| Snrnp25             | 10.48 | 9.28  | -2.29 |
| Nfic                | 10.60 | 9.40  | -2.30 |
| Hmcn1               | 8.61  | 7.41  | -2.30 |
|                     | 8.56  | 7.36  | -2.30 |
| Pten                | 7.62  | 6.42  | -2.30 |
| EG634650 Mpa2l      | 6.70  | 5.50  | -2.30 |
| 4932438A13Rik       | 8.83  | 7.62  | -2.30 |
| Ncapd2              | 10.46 | 9.25  | -2.30 |
| Efemp1              | 13.02 | 11.82 | -2.31 |
| Gpx4                | 12.34 | 11.13 | -2.31 |
| Sfmbt1              | 8.47  | 7.26  | -2.31 |
| Mrpl20              | 10.35 | 9.15  | -2.31 |
| 2210023G05Rik       | 12.28 | 11.07 | -2.31 |
| Mybl1               | 10.94 | 9.73  | -2.31 |
| Alkbh7              | 9.60  | 8.39  | -2.31 |

|                    |       |       |       |
|--------------------|-------|-------|-------|
| Slc39a13           | 10.87 | 9.66  | -2.31 |
| Hmcn1              | 6.98  | 5.77  | -2.31 |
| BC003266           | 10.03 | 8.82  | -2.31 |
| Gch1               | 7.53  | 6.32  | -2.32 |
| Espl1              | 8.68  | 7.47  | -2.32 |
| Ehbp1              | 9.13  | 7.92  | -2.32 |
| Hmgb2              | 9.44  | 8.23  | -2.32 |
|                    | 7.43  | 6.21  | -2.32 |
| Creld2             | 11.20 | 9.99  | -2.32 |
| Kdm5d LOC10004041  |       |       |       |
| 2                  | 6.84  | 5.62  | -2.32 |
| Gpr128             | 7.03  | 5.82  | -2.32 |
| 4932438A13Rik      | 8.52  | 7.31  | -2.33 |
|                    | 7.08  | 5.86  | -2.33 |
| Pdgfc              | 10.19 | 8.97  | -2.33 |
| Hmcn1              | 7.25  | 6.03  | -2.33 |
| Psmb10             | 9.94  | 8.72  | -2.33 |
|                    | 9.09  | 7.87  | -2.33 |
| Chn2 9130019P16Rik | 9.10  | 7.88  | -2.33 |
| Podn               | 8.51  | 7.29  | -2.33 |
|                    | 10.19 | 8.97  | -2.33 |
| Hmcn1              | 7.19  | 5.97  | -2.33 |
| Sulf2              | 12.15 | 10.93 | -2.33 |
| 5730590G19Rik      | 8.88  | 7.65  | -2.33 |
| Hist1h2ak          | 12.87 | 11.65 | -2.34 |
|                    | 8.34  | 7.12  | -2.34 |
| Snord34 Rpl13a     | 11.03 | 9.80  | -2.34 |
| Syn1               | 8.43  | 7.21  | -2.34 |
| Adam19             | 8.16  | 6.94  | -2.34 |
| Pcdh19             | 7.62  | 6.39  | -2.34 |
| Hist2h2bb          | 9.76  | 8.53  | -2.34 |
| Hmcn1              | 7.26  | 6.03  | -2.34 |
| Metrn              | 9.04  | 7.81  | -2.34 |
| AI427809           | 7.99  | 6.77  | -2.34 |
| Efna2              | 9.24  | 8.01  | -2.34 |
| Snord14e           | 10.37 | 9.14  | -2.34 |
| Znrd1              | 10.23 | 9.00  | -2.35 |
| Thsd7a             | 8.30  | 7.07  | -2.35 |
| Glud1              | 11.41 | 10.18 | -2.35 |
| Mcm8               | 8.56  | 7.33  | -2.35 |
| Clec1a             | 7.34  | 6.11  | -2.35 |
| Trdn               | 6.84  | 5.61  | -2.35 |
| Ccdc46             | 7.27  | 6.04  | -2.35 |
| Hmcn1              | 7.02  | 5.78  | -2.35 |
| Cyp27a1            | 7.98  | 6.75  | -2.35 |
|                    | 11.42 | 10.19 | -2.35 |
| Alox5ap            | 8.17  | 6.94  | -2.35 |
| St3gal1            | 9.45  | 8.22  | -2.35 |
| Mcm10              | 9.27  | 8.03  | -2.35 |
| Socs3              | 9.46  | 8.22  | -2.36 |
| Anxa8              | 11.71 | 10.48 | -2.36 |
| Gm10752            | 7.51  | 6.27  | -2.36 |
| Hap1               | 8.53  | 7.29  | -2.36 |
| Gpx4               | 12.41 | 11.17 | -2.36 |

|                     |       |       |       |
|---------------------|-------|-------|-------|
| Cby1                | 10.17 | 8.92  | -2.36 |
| Iqgap3              | 9.02  | 7.78  | -2.36 |
| Sphkap              | 7.06  | 5.82  | -2.37 |
| 4930534B04Rik       | 8.32  | 7.08  | -2.37 |
| Man1a               | 9.50  | 8.25  | -2.37 |
| Snora2b             | 8.27  | 7.03  | -2.37 |
| Creg1 Pappa2        | 10.80 | 9.55  | -2.37 |
| Rad54l              | 8.91  | 7.66  | -2.37 |
| Mrps26              | 9.42  | 8.18  | -2.37 |
| Vps13c              | 9.21  | 7.96  | -2.37 |
| Slc39a7             | 11.13 | 9.88  | -2.37 |
| Mocos               | 8.03  | 6.78  | -2.38 |
| Bambi               | 8.43  | 7.18  | -2.38 |
| Cyp4f16             | 9.11  | 7.86  | -2.38 |
| Ddost               | 12.76 | 11.51 | -2.38 |
| Eepd1               | 8.52  | 7.27  | -2.38 |
| Hmgb2               | 9.44  | 8.19  | -2.38 |
| Hmmr                | 8.53  | 7.28  | -2.38 |
| 4932438A13Rik       | 9.35  | 8.09  | -2.38 |
| C230055K05Rik       | 6.61  | 5.36  | -2.38 |
| Map3k8              | 8.92  | 7.67  | -2.38 |
| Pdxk                | 9.53  | 8.27  | -2.39 |
| Adamts6             | 7.32  | 6.06  | -2.39 |
| Dna2                | 9.24  | 7.98  | -2.39 |
|                     | 8.32  | 7.06  | -2.39 |
| Gxylt1              | 9.55  | 8.30  | -2.39 |
| Hmcn1               | 6.60  | 5.35  | -2.39 |
| Pisd-ps2            | 10.79 | 9.53  | -2.39 |
| Top2a               | 6.65  | 5.39  | -2.39 |
| Apol8               | 8.22  | 6.97  | -2.39 |
| D4Wsu53e            | 10.16 | 8.91  | -2.39 |
| Hjurp 6430706D22Rik | 10.51 | 9.25  | -2.39 |
| Gm10638 Siah1a      | 9.88  | 8.62  | -2.40 |
| Hmox1               | 11.81 | 10.55 | -2.40 |
| Slc31a2             | 12.71 | 11.45 | -2.40 |
| Cndp2               | 11.37 | 10.11 | -2.40 |
| Pml                 | 11.72 | 10.46 | -2.40 |
| Hmcn1               | 7.24  | 5.97  | -2.40 |
| Itgb7               | 8.49  | 7.22  | -2.40 |
| Nynrin              | 8.09  | 6.83  | -2.41 |
| Trdn                | 7.98  | 6.71  | -2.41 |
| Rad54b              | 8.63  | 7.36  | -2.41 |
| Syne2               | 9.17  | 7.91  | -2.41 |
| Hist1h2bh           | 11.56 | 10.29 | -2.41 |
| Gxylt1              | 9.44  | 8.17  | -2.41 |
| Donson              | 8.84  | 7.57  | -2.41 |
| Rab39b              | 7.49  | 6.22  | -2.42 |
| Cdca2               | 8.62  | 7.35  | -2.42 |
| Ncapd3              | 10.38 | 9.11  | -2.42 |
| Gata4               | 8.77  | 7.49  | -2.42 |
| H2-T24              | 8.07  | 6.79  | -2.42 |
| Rfc3                | 10.52 | 9.24  | -2.42 |
|                     | 11.08 | 9.81  | -2.42 |
| Tyms Tyms-ps        | 11.08 | 9.81  | -2.42 |

|                                                                     |       |       |       |
|---------------------------------------------------------------------|-------|-------|-------|
| Ott Gm15085 Luzp4 Gm15127 OTTMUSG0000019001 Gm15128 Gm15097 Gm10439 | 7.52  | 6.24  | -2.43 |
| Masp1                                                               | 7.71  | 6.43  | -2.43 |
| Hmcn1                                                               | 6.84  | 5.56  | -2.43 |
|                                                                     | 8.95  | 7.67  | -2.43 |
| F730047E07Rik                                                       | 8.69  | 7.41  | -2.43 |
| Tram2                                                               | 9.56  | 8.27  | -2.43 |
| Slc12a8                                                             | 8.18  | 6.90  | -2.43 |
| Gtse1                                                               | 11.85 | 10.57 | -2.43 |
| Twf2                                                                | 10.44 | 9.16  | -2.43 |
| Slco2a1                                                             | 9.33  | 8.04  | -2.44 |
| 4932438A13Rik                                                       | 9.04  | 7.76  | -2.44 |
| Ptpn7                                                               | 8.53  | 7.24  | -2.44 |
| Cdc7                                                                | 7.94  | 6.65  | -2.44 |
| Depdc1a                                                             | 7.96  | 6.67  | -2.44 |
| 1110012D08Rik                                                       | 9.32  | 8.03  | -2.44 |
| Pkd1                                                                | 9.65  | 8.36  | -2.44 |
| 4932438A13Rik                                                       | 9.75  | 8.46  | -2.44 |
| Sod3                                                                | 7.33  | 6.04  | -2.44 |
| Gata3                                                               | 8.56  | 7.27  | -2.44 |
| Cdc6                                                                | 9.18  | 7.89  | -2.44 |
| Acta2                                                               | 8.56  | 7.27  | -2.45 |
| Unk                                                                 | 9.87  | 8.58  | -2.45 |
|                                                                     | 10.53 | 9.24  | -2.45 |
| Spnb2                                                               | 12.30 | 11.01 | -2.45 |
| H1fx                                                                | 8.80  | 7.50  | -2.45 |
| Zwilch Lctl                                                         | 9.42  | 8.12  | -2.45 |
| Sesn2                                                               | 10.87 | 9.57  | -2.46 |
| Fut10                                                               | 8.62  | 7.32  | -2.46 |
| P4ha1                                                               | 10.39 | 9.09  | -2.46 |
| Tbx15                                                               | 8.76  | 7.46  | -2.46 |
| Dvl2 Mir324                                                         | 10.32 | 9.02  | -2.46 |
| Prr11                                                               | 9.87  | 8.57  | -2.46 |
| Synm                                                                | 8.60  | 7.30  | -2.46 |
| Ptgds                                                               | 9.37  | 8.07  | -2.46 |
| 1810032O08Rik St6g                                                  |       |       |       |
| alnac2                                                              | 8.55  | 7.25  | -2.46 |
| Rnd2                                                                | 10.05 | 8.75  | -2.46 |
| Tex2                                                                | 9.77  | 8.47  | -2.47 |
| Kif4                                                                | 8.48  | 7.18  | -2.47 |
| Fbln7                                                               | 8.37  | 7.07  | -2.47 |
| Klhl13                                                              | 7.47  | 6.17  | -2.47 |
| Mical2                                                              | 9.20  | 7.90  | -2.47 |
| Them5                                                               | 7.95  | 6.65  | -2.47 |
| 2610005L07Rik A430                                                  |       |       |       |
| 108E01Rik                                                           | 10.21 | 8.90  | -2.47 |
| Pvt1                                                                | 9.82  | 8.52  | -2.47 |
| Tm4sf1                                                              | 13.06 | 11.76 | -2.47 |
| Birc5                                                               | 8.90  | 7.60  | -2.47 |
| Rad9                                                                | 11.42 | 10.11 | -2.48 |
| Trib3                                                               | 9.02  | 7.71  | -2.48 |
| Antxr2                                                              | 9.02  | 7.71  | -2.48 |

|                     |       |       |       |
|---------------------|-------|-------|-------|
| Gen1                | 9.01  | 7.70  | -2.48 |
| Fam83d              | 9.30  | 7.99  | -2.48 |
| Shox2               | 7.82  | 6.51  | -2.48 |
| Samd14              | 8.53  | 7.22  | -2.48 |
| Arrb2               | 9.74  | 8.42  | -2.48 |
| Atp10a              | 9.84  | 8.52  | -2.49 |
| Dnm1                | 9.00  | 7.69  | -2.49 |
| Ifi30               | 12.85 | 11.53 | -2.49 |
| Tbc1d4              | 8.24  | 6.93  | -2.49 |
| Twist1              | 8.78  | 7.47  | -2.49 |
| Cnih2               | 8.67  | 7.35  | -2.49 |
| Serpina3f Serpina3g | 7.44  | 6.12  | -2.50 |
| Cys1                | 8.00  | 6.68  | -2.50 |
| Popdc3              | 8.16  | 6.84  | -2.50 |
| Hmcn1               | 6.96  | 5.64  | -2.50 |
| Ncaph               | 11.01 | 9.69  | -2.50 |
| Arhgap20 9230115E2  |       |       |       |
| 1Rik                | 7.61  | 6.29  | -2.50 |
| Cdt1                | 11.61 | 10.29 | -2.50 |
| Snord16a            | 9.86  | 8.53  | -2.50 |
| F630110N24Rik       | 10.03 | 8.71  | -2.50 |
| Cst3                | 13.95 | 12.62 | -2.51 |
| 2610002D18Rik       | 9.52  | 8.20  | -2.51 |
| BC094916            | 7.30  | 5.98  | -2.51 |
| Cdc20               | 10.47 | 9.14  | -2.51 |
| Hmcn1               | 7.25  | 5.92  | -2.51 |
| Cobll1              | 11.38 | 10.05 | -2.52 |
| Tgfb3               | 7.60  | 6.26  | -2.52 |
| Tcirg1              | 12.13 | 10.80 | -2.52 |
| Psme2 Psme2b-ps     | 10.63 | 9.29  | -2.52 |
| Fam198b             | 9.90  | 8.56  | -2.52 |
| Hmcn1               | 6.76  | 5.42  | -2.53 |
| Tnr                 | 7.81  | 6.48  | -2.53 |
| Cacna2d1            | 8.35  | 7.01  | -2.53 |
| Kcnip3              | 8.22  | 6.88  | -2.53 |
| Armcx2              | 7.79  | 6.45  | -2.53 |
| Zbed3               | 10.23 | 8.89  | -2.53 |
| Prdm5               | 7.67  | 6.33  | -2.53 |
| Celf5               | 9.47  | 8.13  | -2.53 |
| Gm3338              | 8.93  | 7.59  | -2.53 |
| Gm10419             | 7.20  | 5.86  | -2.54 |
| Hmcn1               | 7.44  | 6.10  | -2.54 |
| Igf2bp1             | 8.51  | 7.17  | -2.54 |
| 4932438A13Rik       | 9.01  | 7.67  | -2.54 |
| Depdc1a             | 8.02  | 6.67  | -2.54 |
| Itgb8               | 7.68  | 6.34  | -2.54 |
| Sp8                 | 7.79  | 6.44  | -2.54 |
| Lonp1               | 9.98  | 8.63  | -2.54 |
| Pfn2                | 8.55  | 7.21  | -2.55 |
| Stat1               | 10.84 | 9.50  | -2.55 |
| Gas1                | 9.55  | 8.20  | -2.55 |
| Anln                | 10.78 | 9.43  | -2.55 |
| Rhebl1              | 8.25  | 6.90  | -2.55 |
| Rpain               | 9.55  | 8.20  | -2.55 |
| Pom121 Nsun5        | 10.88 | 9.53  | -2.55 |

|               |       |       |       |
|---------------|-------|-------|-------|
| Sgol1         | 9.15  | 7.80  | -2.55 |
| 1110021L09Rik | 7.77  | 6.42  | -2.56 |
| Clcn7         | 10.94 | 9.58  | -2.56 |
| Slfn2         | 10.45 | 9.09  | -2.56 |
| Ppap2b        | 9.95  | 8.59  | -2.57 |
| Itga10        | 8.52  | 7.15  | -2.57 |
| Ap1s2         | 10.00 | 8.64  | -2.57 |
| Ano3          | 7.79  | 6.43  | -2.57 |
| Adam15        | 10.85 | 9.49  | -2.57 |
| Hoxd10        | 7.98  | 6.62  | -2.58 |
| Sec14l1       | 10.70 | 9.33  | -2.58 |
| Cpeb1         | 7.49  | 6.12  | -2.58 |
| Bin1          | 9.86  | 8.49  | -2.58 |
| Aif1l         | 9.89  | 8.52  | -2.58 |
| Racgap1       | 10.56 | 9.19  | -2.58 |
| Tns1          | 10.14 | 8.77  | -2.59 |
| AnglRnase4    | 10.60 | 9.23  | -2.59 |
|               | 9.94  | 8.56  | -2.59 |
| Tjap1         | 10.16 | 8.79  | -2.59 |
| Tbkbp1        | 9.16  | 7.79  | -2.60 |
| Hmgb2         | 9.40  | 8.02  | -2.60 |
| Ica1          | 8.54  | 7.16  | -2.60 |
| Leprel2       | 8.91  | 7.54  | -2.60 |
| Ahnak2        | 12.49 | 11.11 | -2.60 |
| 9330175E14Rik | 8.17  | 6.79  | -2.60 |
| Palm          | 9.62  | 8.24  | -2.60 |
| Hoxb9         | 9.24  | 7.86  | -2.60 |
| Plin4         | 8.37  | 6.99  | -2.61 |
|               | 9.42  | 8.04  | -2.61 |
| Hmgb2         | 9.50  | 8.12  | -2.61 |
| Galt          | 9.42  | 8.04  | -2.61 |
| Spag5         | 8.81  | 7.42  | -2.61 |
| Chtf18        | 9.35  | 7.97  | -2.61 |
| Chaf1b        | 11.86 | 10.47 | -2.61 |
| Tns1          | 11.52 | 10.14 | -2.61 |
| E2f1          | 10.38 | 8.99  | -2.61 |
| Hhex          | 7.77  | 6.38  | -2.61 |
| Snord49a      | 10.99 | 9.60  | -2.61 |
| Cdon          | 9.69  | 8.31  | -2.61 |
| Cxcl12        | 7.99  | 6.60  | -2.61 |
| Mpdz          | 8.39  | 7.00  | -2.61 |
| Hist1h4h      | 8.61  | 7.22  | -2.61 |
| Ppef1         | 7.14  | 5.75  | -2.61 |
| Hist1h2aa     | 9.77  | 8.38  | -2.61 |
| Dscc1         | 7.01  | 5.62  | -2.62 |
| Bicd1         | 7.51  | 6.12  | -2.62 |
| Trnau1ap      | 10.39 | 8.99  | -2.62 |
| Slfn5         | 7.35  | 5.96  | -2.62 |
| Maf           | 9.73  | 8.34  | -2.63 |
| Flnb          | 11.50 | 10.11 | -2.63 |
| Snora28       | 10.42 | 9.02  | -2.63 |
| Cenpi         | 8.73  | 7.33  | -2.63 |
| Notch3        | 9.32  | 7.92  | -2.63 |
| Mfsd7a        | 8.40  | 7.00  | -2.63 |
| Cdk2          | 10.48 | 9.08  | -2.64 |



|                     |       |       |       |
|---------------------|-------|-------|-------|
| C1rl                | 8.55  | 7.15  | -2.64 |
| C530030P08Rik       | 11.76 | 10.36 | -2.64 |
| Scn1b               | 10.05 | 8.65  | -2.64 |
| C530030P08Rik       | 11.50 | 10.10 | -2.64 |
| Letmd1              | 10.04 | 8.64  | -2.64 |
| Haus4               | 9.20  | 7.80  | -2.64 |
| Plec                | 10.13 | 8.73  | -2.65 |
| Mamld1              | 8.50  | 7.09  | -2.65 |
| Setdb2              | 7.27  | 5.86  | -2.65 |
| Dnajc9              | 10.26 | 8.85  | -2.65 |
| Hmcn1               | 7.26  | 5.85  | -2.65 |
| Gm6651              | 8.99  | 7.58  | -2.66 |
| Stil                | 9.36  | 7.94  | -2.66 |
| Lamc1               | 10.51 | 9.09  | -2.66 |
| Zdhhc18             | 11.12 | 9.71  | -2.66 |
| Hmcn1               | 7.40  | 5.99  | -2.66 |
| Gm4841              | 7.30  | 5.88  | -2.66 |
| Aloxe3              | 8.13  | 6.72  | -2.66 |
| Pknox2              | 7.43  | 6.02  | -2.66 |
| Hmcn1               | 7.39  | 5.98  | -2.67 |
| Kcnab1              | 7.65  | 6.24  | -2.67 |
| Hmcn1               | 7.88  | 6.47  | -2.67 |
| Mcm7                | 12.17 | 10.76 | -2.67 |
| Klf2                | 9.42  | 8.00  | -2.67 |
| Fbxo48              | 7.54  | 6.12  | -2.67 |
| Hist3h2a            | 12.78 | 11.36 | -2.67 |
| Cenpk Ppwd1         | 8.26  | 6.84  | -2.67 |
| Lhx2                | 8.69  | 7.27  | -2.67 |
| Tbl2                | 9.82  | 8.40  | -2.68 |
| Smc2                | 9.99  | 8.57  | -2.68 |
| Nrm                 | 10.93 | 9.51  | -2.68 |
| Cuedc2 Fbxl15       | 12.37 | 10.95 | -2.68 |
| Uhrf1               | 9.68  | 8.26  | -2.68 |
| Tmem8               | 8.86  | 7.43  | -2.69 |
| H2-T22 H2-T9 H2-T10 | 11.45 | 10.02 | -2.69 |
| Tead2               | 9.14  | 7.71  | -2.69 |
| Gramd1b             | 8.77  | 7.34  | -2.69 |
| Ust                 | 9.17  | 7.74  | -2.69 |
| Stmn2               | 7.18  | 5.75  | -2.69 |
| Snord8              | 9.36  | 7.93  | -2.69 |
| Col3a1              | 9.33  | 7.90  | -2.70 |
| 2810417H13Rik       | 10.69 | 9.26  | -2.70 |
| Ddx3y               | 7.09  | 5.66  | -2.70 |
| 9930013L23Rik       | 8.36  | 6.92  | -2.70 |
|                     | 11.11 | 9.67  | -2.70 |
| Atad5               | 8.58  | 7.14  | -2.70 |
| Hmcn1               | 6.77  | 5.33  | -2.71 |
| Glipr2              | 10.57 | 9.13  | -2.71 |
| Gsdmd               | 9.32  | 7.88  | -2.71 |
| Fbxo5               | 9.20  | 7.76  | -2.71 |
| Klra2               | 7.05  | 5.61  | -2.71 |
|                     | 9.72  | 8.28  | -2.71 |
| Kcnt2               | 6.92  | 5.47  | -2.72 |
| Hist1h1b            | 11.91 | 10.47 | -2.72 |

|                   |       |       |       |
|-------------------|-------|-------|-------|
| Hmcn1             | 7.37  | 5.92  | -2.72 |
| Tcn2              | 12.74 | 11.30 | -2.72 |
| Thoc4             | 12.25 | 10.80 | -2.73 |
| Mmel1             | 8.09  | 6.64  | -2.73 |
| Ddit4l            | 8.27  | 6.82  | -2.73 |
| Sema6d            | 7.65  | 6.20  | -2.73 |
| Hmcn1             | 7.85  | 6.39  | -2.74 |
| 2410022L05Rik     | 10.20 | 8.75  | -2.74 |
| Abcb1a            | 8.37  | 6.92  | -2.74 |
| Mef2c             | 8.19  | 6.74  | -2.74 |
|                   | 11.03 | 9.58  | -2.74 |
| Gm6907            | 7.51  | 6.06  | -2.74 |
| Rrm2              | 12.22 | 10.76 | -2.75 |
| Six1              | 7.48  | 6.02  | -2.75 |
| Akap2             | 7.57  | 6.11  | -2.75 |
| Tcf23             | 8.64  | 7.17  | -2.76 |
| Zfyve21           | 10.33 | 8.87  | -2.76 |
| Lamb2             | 11.37 | 9.90  | -2.76 |
| Arhgef12 Sp140    | 8.76  | 7.29  | -2.76 |
| Slc9a9            | 7.74  | 6.28  | -2.77 |
| Gm12250           | 8.03  | 6.56  | -2.77 |
| Dtx4              | 10.08 | 8.61  | -2.77 |
| Lrdd              | 10.17 | 8.69  | -2.77 |
| Ttc7b             | 9.10  | 7.63  | -2.77 |
| Adamts10          | 9.15  | 7.67  | -2.78 |
| Snora16a          | 11.43 | 9.95  | -2.78 |
| Ear2              | 6.71  | 5.23  | -2.79 |
| Foxm1 4933413G19R |       |       |       |
| ik                | 9.89  | 8.41  | -2.79 |
| A530040E14Rik     | 8.19  | 6.71  | -2.79 |
| Polq              | 8.39  | 6.90  | -2.79 |
| Jun               | 10.90 | 9.42  | -2.80 |
| Ccdc141           | 6.98  | 5.50  | -2.80 |
| Vaultrc5          | 11.88 | 10.39 | -2.80 |
| Dsn1              | 9.26  | 7.78  | -2.80 |
| A530040E14Rik     | 8.19  | 6.71  | -2.80 |
| BC030867          | 8.89  | 7.41  | -2.80 |
| Dut               | 9.69  | 8.21  | -2.80 |
| Eif2ak2           | 10.12 | 8.64  | -2.80 |
| lfrd1 Gm7008      | 9.85  | 8.36  | -2.80 |
| Brca1             | 8.89  | 7.40  | -2.81 |
| Gamt              | 8.88  | 7.39  | -2.81 |
| A530040E14Rik     | 8.13  | 6.63  | -2.81 |
| Hist1h4f          | 11.95 | 10.46 | -2.81 |
| Gm12260           | 10.93 | 9.43  | -2.82 |
| Plod3             | 11.30 | 9.81  | -2.82 |
| A530040E14Rik     | 8.13  | 6.63  | -2.82 |
| Cit               | 8.91  | 7.41  | -2.82 |
| Ppm1m             | 10.04 | 8.54  | -2.82 |
| Wdr76             | 9.05  | 7.56  | -2.82 |
| Stard6 Gm9795     | 6.63  | 5.13  | -2.83 |
| Maoa              | 10.46 | 8.96  | -2.83 |
| Cacng7            | 8.56  | 7.05  | -2.83 |
| Mdc1              | 9.93  | 8.43  | -2.83 |
| Tns1              | 10.27 | 8.77  | -2.84 |

|               |       |       |       |
|---------------|-------|-------|-------|
| Syne2         | 9.04  | 7.54  | -2.84 |
| Usp49         | 8.79  | 7.29  | -2.84 |
| 2810417H13Rik | 10.01 | 8.50  | -2.84 |
| Top2a         | 10.76 | 9.25  | -2.85 |
| Crip2         | 13.22 | 11.71 | -2.85 |
|               | 7.57  | 6.06  | -2.85 |
| Zfp367        | 10.28 | 8.77  | -2.85 |
| Tnfaip6       | 7.30  | 5.79  | -2.85 |
| Pard3b        | 7.83  | 6.31  | -2.85 |
| Col6a2        | 9.37  | 7.85  | -2.85 |
| Tcf4          | 10.57 | 9.06  | -2.86 |
| Hemt1 Gml     | 7.76  | 6.25  | -2.86 |
| Neurl2 Ctsa   | 8.29  | 6.77  | -2.87 |
| Tubb6         | 12.41 | 10.89 | -2.87 |
| Esco2         | 8.96  | 7.44  | -2.87 |
| Mcm5          | 12.20 | 10.68 | -2.87 |
| Hsn2          | 9.78  | 8.25  | -2.88 |
| Fbxo21        | 9.47  | 7.95  | -2.88 |
| Cdkn3         | 8.79  | 7.26  | -2.88 |
| Mir15a        | 8.86  | 7.33  | -2.89 |
| Fam65a        | 10.30 | 8.77  | -2.89 |
| B3gnt9        | 9.43  | 7.90  | -2.89 |
| Fuca1         | 10.99 | 9.46  | -2.89 |
| Hcn2          | 8.62  | 7.08  | -2.89 |
| Cldn1         | 7.75  | 6.22  | -2.89 |
| Stard6 Gm9795 | 6.73  | 5.20  | -2.89 |
| Fkbp7         | 8.72  | 7.19  | -2.89 |
| Impact        | 9.80  | 8.27  | -2.90 |
| Plcx2         | 9.18  | 7.65  | -2.90 |
| E2f8          | 9.80  | 8.26  | -2.90 |
| Myg1          | 10.44 | 8.90  | -2.90 |
| Wrap53        | 10.13 | 8.60  | -2.90 |
| Myl7          | 8.04  | 6.50  | -2.90 |
| Hmcn1         | 6.51  | 4.97  | -2.90 |
| Nr1h4         | 7.60  | 6.06  | -2.91 |
| Gml           | 7.90  | 6.36  | -2.91 |
| Clspn         | 8.50  | 6.96  | -2.91 |
| Crlf1         | 9.40  | 7.86  | -2.92 |
| Lhfpl2        | 8.57  | 7.02  | -2.92 |
| Rassf2        | 8.30  | 6.75  | -2.92 |
| Plekhf1       | 9.88  | 8.34  | -2.92 |
| Psm8          | 9.95  | 8.40  | -2.92 |
| Serp1b6c      | 7.75  | 6.20  | -2.92 |
| Rtel1         | 10.18 | 8.63  | -2.93 |
| Tsku          | 9.38  | 7.83  | -2.93 |
| Mmp23         | 8.56  | 7.01  | -2.94 |
| Birc2         | 9.40  | 7.85  | -2.94 |
| 1700081L11Rik | 8.51  | 6.96  | -2.94 |
| Hmcn1         | 6.73  | 5.17  | -2.94 |
| Rbm3          | 8.35  | 6.80  | -2.94 |
| Fam54a        | 8.92  | 7.36  | -2.94 |
| Brip1         | 8.80  | 7.24  | -2.94 |
| Prrg1         | 8.44  | 6.88  | -2.95 |
| Ifi2711       | 12.56 | 11.01 | -2.95 |
| Tap1          | 11.80 | 10.24 | -2.95 |

|                 |       |       |       |
|-----------------|-------|-------|-------|
| 4932438A13Rik   | 10.01 | 8.45  | -2.95 |
|                 | 8.20  | 6.64  | -2.95 |
|                 | 9.99  | 8.43  | -2.95 |
| Hmcn1           | 7.75  | 6.18  | -2.96 |
|                 | 10.44 | 8.87  | -2.96 |
| Col4a2          | 9.15  | 7.59  | -2.96 |
| Frzb            | 7.51  | 5.94  | -2.96 |
| Wdhd1           | 9.50  | 7.94  | -2.96 |
| Gstm3           | 8.28  | 6.71  | -2.96 |
| Gbp5            | 7.09  | 5.53  | -2.96 |
| Eya1            | 7.88  | 6.31  | -2.96 |
| Tmem62          | 9.03  | 7.46  | -2.97 |
| Troap           | 9.72  | 8.16  | -2.97 |
| Hmcn1           | 6.35  | 4.78  | -2.97 |
| Kif15           | 8.98  | 7.41  | -2.97 |
| B4galt4         | 8.72  | 7.15  | -2.97 |
| Slc45a3         | 9.17  | 7.59  | -2.98 |
| Lrg1            | 8.10  | 6.53  | -2.98 |
| 2900052L18Rik   | 10.01 | 8.43  | -2.98 |
| G530011O06Rik   | 7.99  | 6.41  | -2.98 |
| Siva1           | 10.78 | 9.20  | -2.98 |
| Dffb            | 8.73  | 7.15  | -2.99 |
| Rpa2            | 10.16 | 8.57  | -3.00 |
| Adm             | 8.33  | 6.75  | -3.00 |
| Gm5665          | 7.02  | 5.44  | -3.00 |
| Chst12          | 11.50 | 9.91  | -3.01 |
| Nubp1 Fam18a    | 8.05  | 6.46  | -3.01 |
| Ranbp17         | 8.23  | 6.64  | -3.01 |
| Pmm1            | 11.71 | 10.11 | -3.02 |
| Hist1h2bm       | 12.75 | 11.15 | -3.02 |
| Kank2           | 10.03 | 8.43  | -3.02 |
| Ninj1           | 11.77 | 10.17 | -3.02 |
| Anks1b          | 7.96  | 6.36  | -3.03 |
| Man2b1          | 11.56 | 9.96  | -3.04 |
| Car6            | 7.80  | 6.20  | -3.04 |
| Steap2          | 11.35 | 9.74  | -3.04 |
| Chrdl1          | 7.97  | 6.36  | -3.04 |
| Trib2           | 8.92  | 7.32  | -3.04 |
| Rnu12           | 10.87 | 9.26  | -3.05 |
| Stx2            | 10.24 | 8.63  | -3.05 |
| Papss2          | 8.68  | 7.06  | -3.05 |
| Snca            | 8.11  | 6.50  | -3.05 |
| Gabra1          | 7.83  | 6.21  | -3.05 |
| Npep1           | 11.30 | 9.69  | -3.05 |
| Mocs1           | 10.99 | 9.38  | -3.06 |
| Gulp1           | 6.50  | 4.89  | -3.06 |
| Tnfsf12-Tnfsf13 | 9.71  | 8.10  | -3.06 |
| Cchr1           | 10.11 | 8.50  | -3.06 |
| Ahnak2          | 12.00 | 10.38 | -3.06 |
| Ces5            | 13.06 | 11.44 | -3.06 |
| Hmcn1           | 8.00  | 6.38  | -3.07 |
| Gm10115         | 7.40  | 5.78  | -3.07 |
| Hoxd9           | 8.30  | 6.68  | -3.07 |
| Slc23a2         | 10.50 | 8.88  | -3.07 |
| Abca8b          | 7.26  | 5.64  | -3.07 |

|                    |       |       |       |
|--------------------|-------|-------|-------|
| Rbm38              | 10.50 | 8.88  | -3.08 |
| C1qtnf6            | 8.15  | 6.52  | -3.08 |
| Gm10524            | 10.67 | 9.05  | -3.08 |
| Nid2 2700060E02Rik | 8.46  | 6.84  | -3.08 |
| Rev3l              | 8.84  | 7.21  | -3.08 |
| Ptgs1              | 11.19 | 9.57  | -3.09 |
| Ncapg              | 9.52  | 7.90  | -3.09 |
| Arhgdib            | 11.27 | 9.65  | -3.09 |
| Fam13a             | 7.59  | 5.97  | -3.09 |
| Vasn               | 8.10  | 6.47  | -3.09 |
| Mtap1a             | 7.95  | 6.32  | -3.10 |
| Calcr1             | 7.24  | 5.61  | -3.10 |
| Aff2               | 10.87 | 9.24  | -3.10 |
| Palm2 Akap2        | 7.89  | 6.26  | -3.10 |
| Kifc1 LOC100044746 | 9.92  | 8.28  | -3.11 |
| Mybl2              | 10.02 | 8.38  | -3.11 |
| Ltb4r2             | 9.25  | 7.61  | -3.11 |
| Chaf1a Ubxn6       | 9.84  | 8.20  | -3.12 |
| 2410089E03Rik Gm5  |       |       |       |
| 906                | 9.22  | 7.57  | -3.12 |
| Eid3               | 7.30  | 5.65  | -3.13 |
| Nova1              | 8.17  | 6.52  | -3.14 |
| Ckap2              | 10.50 | 8.85  | -3.14 |
| Timd2              | 7.28  | 5.63  | -3.14 |
| Syne2              | 9.40  | 7.75  | -3.14 |
| Sntg1              | 7.65  | 6.00  | -3.14 |
| Btbd19             | 11.29 | 9.64  | -3.14 |
| Man2a1             | 11.04 | 9.39  | -3.14 |
| Boc                | 9.01  | 7.35  | -3.15 |
| Bnc2               | 9.17  | 7.52  | -3.15 |
| Gkap1              | 9.34  | 7.68  | -3.16 |
| D330045A20Rik      | 7.16  | 5.50  | -3.16 |
| Cyp2d22            | 8.77  | 7.11  | -3.16 |
| Tcea3              | 8.84  | 7.18  | -3.16 |
|                    | 9.31  | 7.65  | -3.16 |
| Tbx18              | 7.82  | 6.16  | -3.17 |
| Lgals3bp           | 13.56 | 11.90 | -3.17 |
| Abi3bp             | 7.43  | 5.77  | -3.17 |
| Lrpap1             | 11.24 | 9.58  | -3.17 |
| Nynrin             | 8.31  | 6.64  | -3.18 |
| 1190007F08Rik      | 9.41  | 7.74  | -3.18 |
| Lhx9               | 8.38  | 6.70  | -3.19 |
| Chrd Thpo          | 8.75  | 7.08  | -3.19 |
| Sema3e             | 8.45  | 6.77  | -3.20 |
| Bax                | 11.59 | 9.91  | -3.20 |
| Mmp28 1700020L24R  |       |       |       |
| ik                 | 9.37  | 7.69  | -3.20 |
| Rnu3a              | 10.82 | 9.14  | -3.21 |
| Gas2l3             | 9.70  | 8.02  | -3.21 |
|                    | 9.67  | 7.99  | -3.21 |
| Zfp9               | 7.94  | 6.25  | -3.21 |
| Ank2               | 8.95  | 7.26  | -3.22 |
| Gstm2              | 10.66 | 8.97  | -3.22 |

|               |       |       |       |
|---------------|-------|-------|-------|
| Dpp7          | 12.68 | 10.99 | -3.22 |
| Clcn6         | 9.39  | 7.70  | -3.22 |
| Ifi205        | 12.30 | 10.61 | -3.23 |
| Nradd         | 9.72  | 8.03  | -3.23 |
| Acsf2         | 8.00  | 6.31  | -3.24 |
| Phyh          | 7.72  | 6.02  | -3.25 |
| Zhx3          | 9.84  | 8.14  | -3.25 |
| E030037K03Rik | 7.45  | 5.75  | -3.25 |
| BC049807      | 10.94 | 9.24  | -3.25 |
| Siva1         | 10.78 | 9.08  | -3.26 |
| Acy3          | 10.33 | 8.63  | -3.26 |
| Grtp1         | 9.46  | 7.75  | -3.26 |
| AU021092      | 7.93  | 6.22  | -3.26 |
| Slurp1        | 8.89  | 7.18  | -3.26 |
| Nfkbil2       | 8.96  | 7.25  | -3.27 |
| Emilin1       | 8.77  | 7.06  | -3.27 |
| Hmcn1         | 7.42  | 5.71  | -3.27 |
| Syne1         | 8.42  | 6.71  | -3.27 |
| Usp18         | 12.48 | 10.76 | -3.29 |
| Cntln         | 8.09  | 6.37  | -3.29 |
| Nmral1        | 8.80  | 7.08  | -3.29 |
| 2610036L11Rik | 8.50  | 6.78  | -3.30 |
| Syne2         | 9.39  | 7.67  | -3.30 |
| 8430427H17Rik | 8.96  | 7.23  | -3.31 |
| Xdh           | 11.98 | 10.26 | -3.31 |
| C3ar1         | 7.89  | 6.16  | -3.31 |
| Slfn8         | 7.89  | 6.16  | -3.31 |
| Mt2           | 13.97 | 12.24 | -3.32 |
| Snai1         | 9.79  | 8.06  | -3.32 |
| H6pd          | 11.41 | 9.68  | -3.32 |
| Nmnat2        | 9.18  | 7.45  | -3.33 |
| Snord118      | 10.99 | 9.26  | -3.33 |
| Mum111        | 7.70  | 5.97  | -3.33 |
| Snord118      | 10.99 | 9.25  | -3.34 |
| Mlf1          | 8.05  | 6.31  | -3.34 |
| Serpine1      | 12.05 | 10.30 | -3.36 |
| Cfb           | 8.56  | 6.81  | -3.36 |
| Gab3          | 8.05  | 6.30  | -3.36 |
| Hist1h2bb     | 12.80 | 11.05 | -3.36 |
| Cdh11         | 7.87  | 6.12  | -3.36 |
| Abhd1         | 9.57  | 7.81  | -3.38 |
| Hunk          | 9.20  | 7.45  | -3.38 |
| Glis3         | 9.19  | 7.44  | -3.38 |
| Tgm2          | 9.33  | 7.57  | -3.39 |
| Fos           | 9.16  | 7.40  | -3.39 |
| Abcc3         | 8.68  | 6.92  | -3.39 |
| ATP6 Gm10925  | 9.24  | 7.48  | -3.40 |
| 6330503K22Rik | 9.38  | 7.61  | -3.40 |
| Nbl1          | 9.02  | 7.25  | -3.40 |
| Ccna2         | 11.53 | 9.76  | -3.41 |
| Pde3b         | 7.37  | 5.60  | -3.42 |
| Cdr2l         | 9.43  | 7.66  | -3.42 |
| Cacna2d1      | 7.75  | 5.98  | -3.43 |
| Ecscr         | 8.98  | 7.20  | -3.43 |
| Syce2         | 9.27  | 7.49  | -3.43 |

|                      |       |       |       |
|----------------------|-------|-------|-------|
| Sp110 C130026 21Ri   |       |       |       |
| k LOC100041885       | 9.91  | 8.13  | -3.43 |
| Ptpv                 | 8.60  | 6.82  | -3.44 |
| Kctd17               | 9.82  | 8.04  | -3.44 |
| Tmeff2               | 8.52  | 6.74  | -3.44 |
| Dapk1                | 10.79 | 9.01  | -3.45 |
| Syne1                | 8.41  | 6.62  | -3.45 |
| Tbc1d24              | 9.43  | 7.64  | -3.46 |
|                      | 11.03 | 9.24  | -3.46 |
| Ccdc109b             | 9.09  | 7.30  | -3.46 |
| E330016A19Rik        | 7.83  | 6.04  | -3.46 |
| Igsf11               | 8.90  | 7.11  | -3.46 |
| Man1c1               | 8.67  | 6.87  | -3.46 |
| Rarres1              | 7.87  | 6.07  | -3.46 |
| Ehd3                 | 8.89  | 7.08  | -3.49 |
| Ear10 Ear2 Ear12 Ear |       |       |       |
| 3                    | 7.67  | 5.86  | -3.49 |
| Acsf2                | 8.12  | 6.31  | -3.49 |
| Dlg4                 | 9.24  | 7.44  | -3.49 |
| Taf1d                | 10.89 | 9.08  | -3.50 |
|                      | 10.95 | 9.14  | -3.50 |
| Hmcn1                | 7.68  | 5.88  | -3.50 |
| Pbx4                 | 9.75  | 7.94  | -3.50 |
| Asf1b                | 11.96 | 10.15 | -3.51 |
| BC025446             | 8.04  | 6.23  | -3.51 |
| Isg15                | 8.10  | 6.28  | -3.51 |
| Meis2                | 10.49 | 8.67  | -3.51 |
| Gli3                 | 9.88  | 8.07  | -3.52 |
| Map4k2               | 10.95 | 9.14  | -3.52 |
| Hmcn1                | 7.33  | 5.51  | -3.52 |
| Rab3il1              | 9.03  | 7.21  | -3.53 |
| Mapk8ip1             | 9.40  | 7.59  | -3.53 |
| Ano3 Muc15           | 8.18  | 6.36  | -3.53 |
| Ifi203               | 10.23 | 8.41  | -3.53 |
| Trdn                 | 8.74  | 6.92  | -3.53 |
| Cdk14                | 8.06  | 6.24  | -3.54 |
| Tle4                 | 8.05  | 6.23  | -3.55 |
| Kntc1                | 9.02  | 7.19  | -3.55 |
| Bche                 | 7.43  | 5.60  | -3.55 |
| Abcg2                | 8.05  | 6.22  | -3.56 |
| Acot2                | 11.54 | 9.71  | -3.56 |
| Pcolce2              | 9.20  | 7.37  | -3.56 |
| Arhgap11a            | 10.01 | 8.18  | -3.56 |
| Spc24                | 9.25  | 7.41  | -3.57 |
| Hist1h4c             | 11.41 | 9.58  | -3.57 |
| Sepn1                | 10.51 | 8.67  | -3.57 |
| Ccnf                 | 10.67 | 8.83  | -3.58 |
| Pla2g2e              | 9.28  | 7.45  | -3.58 |
| Hoxb2                | 8.94  | 7.10  | -3.58 |
| Ddit3 Mars           | 9.75  | 7.90  | -3.59 |
| Stat2                | 11.02 | 9.18  | -3.60 |
| Rbp1                 | 8.74  | 6.89  | -3.60 |
| Nfix                 | 12.05 | 10.20 | -3.61 |
| Arhgap23             | 10.57 | 8.72  | -3.61 |
| Fam129a              | 8.35  | 6.49  | -3.62 |

|                      |       |       |       |
|----------------------|-------|-------|-------|
| Zfp287               | 7.82  | 5.95  | -3.65 |
| Cxx1c                | 8.41  | 6.54  | -3.65 |
| Galk1 Itgb4          | 9.08  | 7.21  | -3.66 |
| Lrp1                 | 11.92 | 10.05 | -3.66 |
|                      | 8.99  | 7.11  | -3.68 |
| H2-T10 H2-T9         | 9.59  | 7.71  | -3.68 |
| Tesc                 | 9.91  | 8.03  | -3.68 |
| Casc5                | 9.62  | 7.74  | -3.68 |
| Tdo2                 | 7.23  | 5.35  | -3.69 |
| Zcchc11              | 9.86  | 7.98  | -3.70 |
| Ms4a4b               | 7.03  | 5.14  | -3.70 |
| Nynrin               | 8.29  | 6.40  | -3.71 |
| Ptprq                | 8.20  | 6.31  | -3.72 |
| Sh3tc1               | 9.41  | 7.52  | -3.72 |
|                      | 7.13  | 5.23  | -3.72 |
| Gaa                  | 12.19 | 10.29 | -3.73 |
| Cd248                | 9.41  | 7.51  | -3.73 |
| Eno3                 | 10.77 | 8.87  | -3.73 |
| Gab2                 | 9.72  | 7.82  | -3.73 |
| Sardh                | 8.81  | 6.91  | -3.74 |
| Trim9                | 8.44  | 6.54  | -3.75 |
| Tk1                  | 11.15 | 9.24  | -3.75 |
| Ifih1                | 9.93  | 8.02  | -3.76 |
| Pla2g15              | 9.72  | 7.81  | -3.76 |
| Akr1c14              | 7.36  | 5.45  | -3.77 |
| Tk1                  | 11.25 | 9.33  | -3.77 |
| Eml1                 | 9.01  | 7.09  | -3.78 |
| Ttc28                | 8.56  | 6.64  | -3.78 |
| Tspan4               | 12.61 | 10.69 | -3.79 |
| Icam2                | 8.99  | 7.06  | -3.80 |
| Heph11               | 7.86  | 5.93  | -3.80 |
|                      | 8.21  | 6.28  | -3.80 |
| Hmcn1                | 8.03  | 6.10  | -3.81 |
| Procr                | 10.34 | 8.41  | -3.81 |
| Grik2                | 7.64  | 5.71  | -3.81 |
| Abcc5                | 10.53 | 8.60  | -3.82 |
| Nanos1               | 9.69  | 7.75  | -3.84 |
| Fam46a               | 7.70  | 5.76  | -3.84 |
| Mid1 LOC677593       | 10.50 | 8.56  | -3.84 |
| Ctsf                 | 8.53  | 6.58  | -3.87 |
| Wdr67                | 10.12 | 8.17  | -3.87 |
| Upk1b                | 11.83 | 9.87  | -3.87 |
|                      | 9.34  | 7.39  | -3.88 |
| Gchfr                | 10.19 | 8.23  | -3.89 |
| Cebpd                | 9.07  | 7.11  | -3.89 |
| Ear10 Ear2 Ear12 Ear |       |       |       |
| 3                    | 7.78  | 5.82  | -3.89 |
| E2f7                 | 10.61 | 8.65  | -3.89 |
| Fam180a              | 8.79  | 6.83  | -3.89 |
| Dcbld2               | 11.63 | 9.66  | -3.90 |
| Fam105a              | 8.05  | 6.09  | -3.91 |
| Zfp334               | 8.83  | 6.87  | -3.91 |
| Hmcn1                | 7.42  | 5.45  | -3.92 |
| Gpr124               | 9.15  | 7.17  | -3.93 |
| Orm3                 | 7.59  | 5.61  | -3.94 |



|              |       |       |       |
|--------------|-------|-------|-------|
| Hmgn2        | 11.63 | 9.65  | -3.94 |
| Fmnl2        | 10.03 | 8.05  | -3.94 |
| Gm10825      | 8.44  | 6.46  | -3.95 |
| Flt4         | 8.49  | 6.50  | -3.95 |
|              | 7.47  | 5.49  | -3.95 |
| Hmgn2        | 11.46 | 9.48  | -3.97 |
| Bace1        | 9.34  | 7.35  | -3.97 |
| Upk3b        | 9.04  | 7.05  | -3.97 |
| Hmcn1        | 7.91  | 5.92  | -3.98 |
| Gm16494      | 10.01 | 8.02  | -3.98 |
| Diap3        | 9.11  | 7.12  | -3.98 |
| Trdn         | 7.92  | 5.93  | -3.98 |
| Hmgcl        | 10.64 | 8.64  | -3.99 |
| Uty          | 7.44  | 5.44  | -4.00 |
| Rad51        | 9.93  | 7.93  | -4.01 |
| Reck         | 8.83  | 6.82  | -4.02 |
| Aldh1l2      | 8.55  | 6.54  | -4.02 |
| Gmn          | 10.81 | 8.80  | -4.02 |
| Neil3        | 9.21  | 7.20  | -4.02 |
| Cenpm        | 11.96 | 9.95  | -4.03 |
| Hmgn2        | 11.55 | 9.53  | -4.03 |
| Rasgrf2      | 7.85  | 5.83  | -4.04 |
| Pde8a        | 8.35  | 6.34  | -4.04 |
| Hmgn2        | 11.48 | 9.46  | -4.06 |
| Id1          | 11.45 | 9.43  | -4.06 |
| Clic4        | 11.55 | 9.52  | -4.06 |
| Snora34      | 11.84 | 9.81  | -4.07 |
| Sparc        | 13.42 | 11.39 | -4.09 |
| Odz3         | 8.05  | 6.01  | -4.10 |
| Pcdh9        | 8.93  | 6.90  | -4.10 |
| Smarca1      | 7.82  | 5.79  | -4.10 |
| Igfbp6       | 8.77  | 6.73  | -4.11 |
| Eif2s3y      | 7.04  | 5.00  | -4.11 |
| Ctsz         | 12.92 | 10.88 | -4.12 |
| Gata6        | 11.18 | 9.13  | -4.12 |
| Ncoa4 Gm6768 | 12.06 | 10.01 | -4.13 |
| Ptpla        | 7.79  | 5.75  | -4.13 |
| Ccl2         | 11.46 | 9.41  | -4.14 |
| Plxdc1       | 8.70  | 6.65  | -4.14 |
| Cda          | 11.84 | 9.79  | -4.14 |
| Gbp4         | 8.79  | 6.73  | -4.15 |
| Fli1         | 8.60  | 6.54  | -4.15 |
| Apc2         | 9.15  | 7.09  | -4.16 |
| Fam149a      | 8.81  | 6.75  | -4.17 |
| Kdelr3       | 10.33 | 8.27  | -4.18 |
| Mpp6         | 10.77 | 8.70  | -4.18 |
| Ccne2 Ints8  | 9.81  | 7.75  | -4.18 |
| Dthd1        | 8.22  | 6.15  | -4.20 |
| Emr4         | 7.70  | 5.63  | -4.20 |
| Scarna17     | 11.88 | 9.80  | -4.22 |
| Scarna17     | 11.88 | 9.80  | -4.22 |
| Plxna2       | 10.25 | 8.16  | -4.25 |
| Pcdh10       | 8.44  | 6.35  | -4.26 |
| Fzd4         | 9.03  | 6.93  | -4.29 |
| Tspan8       | 8.01  | 5.91  | -4.29 |

|                   |       |       |       |
|-------------------|-------|-------|-------|
| Dhfr Msh3         | 10.44 | 8.33  | -4.33 |
| Iffo1             | 8.63  | 6.51  | -4.33 |
| Nsg1              | 9.08  | 6.96  | -4.33 |
| Gbp9              | 8.70  | 6.59  | -4.33 |
| Plod1             | 10.64 | 8.52  | -4.35 |
| Cd302             | 7.07  | 4.95  | -4.35 |
| Myom2             | 8.75  | 6.63  | -4.35 |
| Jmjd8 Stub1       | 9.63  | 7.51  | -4.36 |
| Steap1            | 9.66  | 7.54  | -4.36 |
| Ncoa4 Gm6768      | 12.47 | 10.35 | -4.36 |
|                   | 11.29 | 9.17  | -4.37 |
| Zfp57             | 10.36 | 8.24  | -4.37 |
| Rock2             | 10.87 | 8.74  | -4.38 |
| Irf9              | 10.81 | 8.68  | -4.39 |
| Pdk4              | 8.05  | 5.91  | -4.40 |
| Shcbp1            | 8.50  | 6.36  | -4.40 |
| Flt1              | 9.53  | 7.40  | -4.40 |
| Zbtb20            | 10.27 | 8.13  | -4.40 |
| Fbln2             | 12.47 | 10.33 | -4.40 |
| BC048355          | 11.21 | 9.07  | -4.41 |
| C4b C4a           | 8.82  | 6.68  | -4.41 |
| Gm12185           | 7.37  | 5.22  | -4.43 |
|                   | 8.57  | 6.42  | -4.44 |
| Arnt2             | 9.39  | 7.23  | -4.46 |
| Hspg2             | 11.24 | 9.08  | -4.47 |
| Eya4              | 9.82  | 7.66  | -4.47 |
| Efemp2            | 10.24 | 8.08  | -4.47 |
| Trim47            | 9.62  | 7.46  | -4.48 |
| Hsf4              | 9.50  | 7.33  | -4.50 |
| Pole              | 10.97 | 8.80  | -4.50 |
| Rhoj              | 9.08  | 6.91  | -4.50 |
| Atad2             | 10.75 | 8.58  | -4.50 |
| Csn3              | 7.35  | 5.18  | -4.51 |
| Hmcn1             | 6.98  | 4.81  | -4.51 |
| Scn7a             | 7.64  | 5.47  | -4.51 |
| 6330406115Rik     | 7.92  | 5.75  | -4.52 |
| Tubb3 Mc1r        | 9.56  | 7.39  | -4.52 |
| Pcdh9             | 9.11  | 6.94  | -4.52 |
| Ncapg2            | 10.01 | 7.83  | -4.53 |
| Hhip1             | 9.01  | 6.83  | -4.53 |
| C1ra              | 8.57  | 6.39  | -4.54 |
| Tppp3             | 9.49  | 7.30  | -4.54 |
| C1qtnf1           | 9.46  | 7.28  | -4.55 |
| Mki67             | 11.25 | 9.06  | -4.56 |
| Cxx1a Cxx1b Cxx1c | 10.32 | 8.13  | -4.56 |
| Lonrf3            | 8.56  | 6.37  | -4.56 |
| Hoxd8             | 8.16  | 5.97  | -4.56 |
| Tst               | 9.74  | 7.55  | -4.57 |
| Hmcn1             | 7.84  | 5.64  | -4.57 |
| E430029J22Rik     | 7.51  | 5.31  | -4.58 |
| Lcat              | 9.54  | 7.35  | -4.58 |
| BC046404          | 10.55 | 8.35  | -4.59 |
| Npr2              | 8.55  | 6.35  | -4.59 |
| Cyyr1             | 8.62  | 6.42  | -4.59 |
| 1190002N15Rik     | 8.86  | 6.67  | -4.59 |

|                                                             |       |       |       |
|-------------------------------------------------------------|-------|-------|-------|
| Evc                                                         | 9.68  | 7.48  | -4.59 |
| Col1a1                                                      | 10.17 | 7.97  | -4.62 |
| Epb4.1l3                                                    | 8.22  | 6.01  | -4.64 |
| Agpat4                                                      | 9.30  | 7.08  | -4.65 |
| Hrct1                                                       | 9.60  | 7.38  | -4.67 |
| Bgn                                                         | 9.17  | 6.95  | -4.67 |
| Ifi35                                                       | 11.61 | 9.39  | -4.68 |
| Dlx2                                                        | 9.53  | 7.29  | -4.71 |
| Gm4955                                                      | 7.98  | 5.74  | -4.71 |
| Gpr146                                                      | 8.46  | 6.22  | -4.72 |
| Plekhh2                                                     | 8.64  | 6.40  | -4.73 |
| Irgm2 Igtg                                                  | 10.46 | 8.21  | -4.75 |
| Syde1                                                       | 10.62 | 8.37  | -4.75 |
| Mir568                                                      | 7.97  | 5.72  | -4.75 |
| Ugt1a9 Ugt1a1 Ugt1a5 Ugt1a10 Ugt1a2 Ugt1a6a Ugt1a7c Ugt1a6b | 9.73  | 7.47  | -4.78 |
| Fermt2                                                      | 8.85  | 6.59  | -4.78 |
| Adamts2                                                     | 9.53  | 7.27  | -4.78 |
| Hexa                                                        | 12.71 | 10.45 | -4.81 |
| Cxx1a Cxx1b Cxx1c                                           | 10.36 | 8.09  | -4.82 |
| Ndrg2                                                       | 9.79  | 7.52  | -4.82 |
| Msr3                                                        | 9.92  | 7.65  | -4.84 |
| Parp10 Plec                                                 | 10.45 | 8.18  | -4.85 |
| 2210011C24Rik                                               | 10.49 | 8.21  | -4.85 |
| H2-Q8                                                       | 11.84 | 9.56  | -4.88 |
| Rasl11a                                                     | 9.72  | 7.44  | -4.88 |
| Mxra7                                                       | 9.55  | 7.26  | -4.89 |
| Map3k6                                                      | 9.49  | 7.20  | -4.89 |
| Esyt1                                                       | 11.39 | 9.09  | -4.90 |
| Mmp27                                                       | 8.19  | 5.89  | -4.93 |
| Sipa1                                                       | 10.47 | 8.16  | -4.94 |
| Hic1                                                        | 9.55  | 7.25  | -4.94 |
| Fxyd5                                                       | 12.40 | 10.10 | -4.95 |
| Enpp5                                                       | 10.73 | 8.42  | -4.95 |
| Cdkn2c                                                      | 10.22 | 7.91  | -4.96 |
| Pla1a                                                       | 9.67  | 7.36  | -4.97 |
| Fibin                                                       | 8.09  | 5.77  | -4.98 |
| Paqr4 Pkmyt1                                                | 10.72 | 8.41  | -4.98 |
| Tmem88 Lsmd1                                                | 9.53  | 7.19  | -5.04 |
| Ctca2 Ctca1                                                 | 8.58  | 6.24  | -5.05 |
| Pex5l                                                       | 9.18  | 6.84  | -5.06 |
| Selm                                                        | 10.36 | 8.02  | -5.06 |
| Oas3                                                        | 11.46 | 9.12  | -5.07 |
| Fam46a                                                      | 9.79  | 7.45  | -5.07 |
| C3                                                          | 12.58 | 10.23 | -5.07 |
| Pear1                                                       | 9.35  | 7.00  | -5.10 |
| Sema3d                                                      | 8.17  | 5.82  | -5.10 |
| Pice1                                                       | 8.45  | 6.09  | -5.12 |
| A830019P07Rik                                               | 8.87  | 6.51  | -5.13 |
| H2-gs10 H2-Q5                                               | 11.91 | 9.55  | -5.13 |
| Akap2                                                       | 8.92  | 6.56  | -5.14 |
| Tbx1                                                        | 9.96  | 7.60  | -5.15 |
| Ogn                                                         | 7.83  | 5.45  | -5.19 |

|                      |       |       |       |
|----------------------|-------|-------|-------|
| Snora44              | 11.17 | 8.79  | -5.20 |
| Add3                 | 11.31 | 8.93  | -5.22 |
| Tfpi                 | 9.19  | 6.80  | -5.23 |
| Mxd3                 | 10.09 | 7.70  | -5.25 |
| Bst2                 | 12.78 | 10.39 | -5.25 |
| Tcf19                | 12.90 | 10.50 | -5.28 |
| Nod1                 | 9.27  | 6.86  | -5.28 |
| Lgals9               | 12.96 | 10.56 | -5.30 |
| BC006779             | 10.14 | 7.74  | -5.30 |
| I830012O16Rik        | 7.94  | 5.53  | -5.31 |
| Ltbp3                | 10.64 | 8.23  | -5.31 |
| Apbb1ip              | 8.32  | 5.91  | -5.31 |
| Wt1                  | 9.66  | 7.25  | -5.33 |
| Mras                 | 10.31 | 7.87  | -5.42 |
| Adam23 LOC1000460    |       |       |       |
| 35                   | 8.51  | 6.07  | -5.43 |
| Ddah2                | 9.62  | 7.17  | -5.46 |
| Cdhr1                | 8.74  | 6.29  | -5.46 |
| Mrc2                 | 9.13  | 6.68  | -5.47 |
| St3gal3              | 9.57  | 7.11  | -5.47 |
| Cul7                 | 9.34  | 6.89  | -5.48 |
| Ddr2                 | 9.53  | 7.08  | -5.48 |
| Adam22               | 8.33  | 5.87  | -5.49 |
| Slc41a2              | 9.10  | 6.64  | -5.50 |
| Gpr165               | 9.00  | 6.54  | -5.51 |
| Npy1r                | 8.42  | 5.96  | -5.52 |
| Heph                 | 8.52  | 6.05  | -5.54 |
| Twist2               | 10.45 | 7.98  | -5.54 |
| Gm10785              | 10.37 | 7.89  | -5.57 |
| Lrrcc1               | 9.06  | 6.58  | -5.59 |
| Mapk12               | 11.08 | 8.59  | -5.62 |
| Lpar1                | 9.60  | 7.11  | -5.64 |
| Zbtb20               | 10.20 | 7.70  | -5.66 |
| Gbp2                 | 10.18 | 7.68  | -5.68 |
| Slc9a3r2             | 10.04 | 7.53  | -5.68 |
| 4930486L24Rik        | 8.68  | 6.17  | -5.69 |
| Fgf18                | 9.71  | 7.20  | -5.69 |
| Camk1                | 9.26  | 6.75  | -5.69 |
| Slc16a3              | 9.91  | 7.38  | -5.77 |
| Ube2l6               | 11.71 | 9.18  | -5.79 |
| Gca                  | 8.17  | 5.63  | -5.80 |
| A430107O13Rik        | 8.78  | 6.25  | -5.80 |
| Gxylt2               | 9.13  | 6.58  | -5.83 |
| Myh10                | 9.11  | 6.56  | -5.83 |
| Slc12a4              | 11.09 | 8.54  | -5.84 |
| Ear1 Ear10 Ear2 Ear1 |       |       |       |
| 2 Ear3               | 8.28  | 5.73  | -5.86 |
| Gabre                | 10.42 | 7.87  | -5.86 |
| B930041F14Rik        | 10.79 | 8.24  | -5.87 |
| Fam132a              | 10.04 | 7.49  | -5.87 |
| Ttyh2                | 10.38 | 7.82  | -5.88 |
| Clip3                | 9.64  | 7.08  | -5.88 |
| Tnfrsf18             | 11.88 | 9.31  | -5.90 |
| Egr1                 | 10.37 | 7.81  | -5.92 |
| St6galnac4           | 9.13  | 6.56  | -5.93 |

|               |       |      |       |
|---------------|-------|------|-------|
| Lass4         | 10.39 | 7.82 | -5.94 |
| Mx2           | 8.26  | 5.69 | -5.95 |
| Itga5         | 10.63 | 8.06 | -5.95 |
| Zeb2          | 9.01  | 6.44 | -5.96 |
| Uap1l1        | 11.43 | 8.86 | -5.97 |
| Ppap2a        | 11.57 | 9.00 | -5.97 |
|               | 11.38 | 8.80 | -5.97 |
| Cdc42ep2      | 9.76  | 7.18 | -5.99 |
| Nr1h3         | 9.77  | 7.19 | -5.99 |
| Gstk1         | 8.65  | 6.06 | -6.02 |
| Slfn9         | 10.38 | 7.78 | -6.03 |
| Foxf1a        | 8.84  | 6.25 | -6.03 |
| Npy           | 9.56  | 6.96 | -6.04 |
| Ear11         | 8.01  | 5.42 | -6.05 |
| Elmo1         | 8.68  | 6.08 | -6.05 |
| Col4a1        | 10.10 | 7.50 | -6.09 |
| Lipn          | 8.04  | 5.44 | -6.10 |
| Rarb          | 8.85  | 6.24 | -6.10 |
| Arhgap31      | 9.73  | 7.12 | -6.10 |
| Gm5077        | 8.91  | 6.30 | -6.13 |
| Rbpms         | 10.28 | 7.66 | -6.13 |
| Tnxb          | 9.78  | 7.16 | -6.13 |
| Trdn          | 7.50  | 4.88 | -6.14 |
| Zbtb16        | 11.70 | 9.08 | -6.15 |
| Scarf2        | 10.38 | 7.76 | -6.15 |
| Ar            | 8.34  | 5.71 | -6.16 |
| Gucy1a2       | 8.91  | 6.29 | -6.17 |
| Dlx1          | 9.71  | 7.09 | -6.17 |
| Sirpa         | 9.93  | 7.30 | -6.20 |
|               | 8.64  | 6.00 | -6.23 |
| Lama4         | 8.96  | 6.32 | -6.25 |
| Kif18b        | 11.87 | 9.23 | -6.25 |
| Ttc28         | 9.78  | 7.14 | -6.25 |
| Gm98          | 10.06 | 7.41 | -6.25 |
|               | 8.38  | 5.73 | -6.26 |
| Atf3          | 12.02 | 9.38 | -6.26 |
| Wipf1         | 8.96  | 6.31 | -6.26 |
| St6galnac6    | 9.70  | 7.05 | -6.28 |
| Emilin2       | 9.70  | 7.04 | -6.30 |
| Dzip1 Cldn10a | 8.48  | 5.81 | -6.33 |
| Rgl1          | 9.40  | 6.73 | -6.36 |
| Npr1          | 9.33  | 6.65 | -6.38 |
| Mertk         | 8.89  | 6.22 | -6.39 |
| Id3           | 10.21 | 7.53 | -6.39 |
| Aldh1a7       | 9.59  | 6.91 | -6.41 |
| Abca1         | 9.29  | 6.60 | -6.42 |
| Plscr4        | 9.45  | 6.77 | -6.43 |
| Decr1         | 8.55  | 5.87 | -6.43 |
| Gypc          | 9.44  | 6.75 | -6.46 |
| Peg10         | 9.01  | 6.32 | -6.46 |
| Reep2         | 10.40 | 7.70 | -6.48 |
| Eno2          | 9.51  | 6.82 | -6.49 |
| Nxph1         | 9.02  | 6.32 | -6.50 |
| B4galt6       | 8.75  | 6.04 | -6.52 |
| Ccl7          | 10.62 | 7.91 | -6.52 |

|                   |       |       |       |
|-------------------|-------|-------|-------|
| Fndc1 LOC10003909 |       |       |       |
| 1                 | 9.20  | 6.49  | -6.54 |
| Osmr              | 10.89 | 8.18  | -6.54 |
|                   | 11.12 | 8.41  | -6.55 |
| Gm8979 Gm8989 Gvi |       |       |       |
| n1                | 7.61  | 4.89  | -6.60 |
| Rnf213            | 11.53 | 8.81  | -6.61 |
| Rgs2              | 8.61  | 5.88  | -6.62 |
| Sdpr              | 8.97  | 6.24  | -6.64 |
| Col6a1            | 10.71 | 7.97  | -6.67 |
| Hmcn1             | 8.04  | 5.30  | -6.68 |
| Shisa4            | 10.54 | 7.80  | -6.69 |
| Loxl2             | 9.28  | 6.53  | -6.73 |
| Fmnl3             | 9.36  | 6.60  | -6.79 |
| Gas7              | 10.15 | 7.39  | -6.81 |
| Loxl3 Htra2       | 10.31 | 7.54  | -6.81 |
| Itgb3             | 9.82  | 7.05  | -6.82 |
| Rsad2             | 10.33 | 7.56  | -6.86 |
| Gucy1a3           | 8.61  | 5.83  | -6.87 |
| Bglap2 Bglap-rs1  | 10.25 | 7.47  | -6.90 |
| Gm4951            | 8.61  | 5.83  | -6.90 |
| Vat1l             | 9.00  | 6.21  | -6.91 |
| Mras              | 9.94  | 7.15  | -6.93 |
| Mme               | 8.55  | 5.76  | -6.93 |
|                   | 9.62  | 6.82  | -6.94 |
| Scrn1             | 9.63  | 6.83  | -6.94 |
| AI607873          | 12.92 | 10.11 | -7.02 |
| Kik1b24           | 9.04  | 6.22  | -7.05 |
| 4930503L19Rik     | 8.60  | 5.78  | -7.07 |
| Fcgrt             | 10.25 | 7.42  | -7.08 |
| Rnd1              | 9.35  | 6.51  | -7.12 |
| Plac8             | 8.60  | 5.77  | -7.13 |
| Ch25h             | 9.34  | 6.50  | -7.18 |
| Ccl5              | 10.65 | 7.80  | -7.21 |
| Trf               | 9.48  | 6.62  | -7.28 |
| Serping1          | 8.92  | 6.06  | -7.29 |
| Lims2 Gpr17       | 10.60 | 7.74  | -7.30 |
| Hsd11b1           | 9.32  | 6.44  | -7.34 |
|                   | 11.16 | 8.28  | -7.36 |
| Lifr              | 8.80  | 5.90  | -7.45 |
| Sp110 LOC10004188 |       |       |       |
| 5                 | 10.03 | 7.13  | -7.51 |
| Rcn3              | 9.80  | 6.88  | -7.55 |
| Armxc3            | 9.05  | 6.13  | -7.57 |
|                   | 11.88 | 8.96  | -7.57 |
|                   | 12.02 | 9.10  | -7.58 |
| Arrb1             | 10.07 | 7.15  | -7.58 |
| Slfn3             | 9.29  | 6.36  | -7.60 |
| Snx32             | 9.12  | 6.19  | -7.62 |
| Plac9             | 10.08 | 7.15  | -7.65 |
| Tnfrsf1b          | 10.09 | 7.15  | -7.68 |
|                   | 12.26 | 9.32  | -7.69 |
| Nrn1              | 8.93  | 5.98  | -7.69 |
| Fosl1 Ccdc85b     | 11.52 | 8.57  | -7.70 |
|                   | 11.75 | 8.80  | -7.73 |

|                |       |       |       |
|----------------|-------|-------|-------|
| Ptplad2        | 9.04  | 6.09  | -7.73 |
| Klhl4          | 8.90  | 5.95  | -7.74 |
|                | 11.12 | 8.16  | -7.76 |
| Prl8a2         | 8.89  | 5.93  | -7.77 |
| Irgm1          | 11.57 | 8.61  | -7.78 |
| Pltp Ctsa      | 12.94 | 9.98  | -7.80 |
| F2r            | 9.75  | 6.78  | -7.85 |
| Rnf213         | 12.08 | 9.10  | -7.87 |
| 2610528A11Rik  | 10.96 | 7.98  | -7.89 |
|                | 10.61 | 7.63  | -7.91 |
| Snord53        | 11.44 | 8.45  | -7.94 |
| Phf11          | 8.36  | 5.37  | -7.95 |
| Gstm1          | 11.63 | 8.64  | -7.95 |
| Plac9          | 10.09 | 7.09  | -7.98 |
| Plac9          | 10.09 | 7.09  | -7.99 |
| Disp1          | 9.61  | 6.62  | -8.00 |
| Amy1           | 8.68  | 5.66  | -8.12 |
| Klhl6          | 9.07  | 6.05  | -8.16 |
| Figf           | 10.88 | 7.84  | -8.20 |
| Pon3           | 8.99  | 5.95  | -8.22 |
| Slc35d2        | 8.99  | 5.95  | -8.24 |
| Mmp19          | 9.72  | 6.67  | -8.27 |
| Crct1          | 11.89 | 8.84  | -8.28 |
| Sorbs3         | 10.51 | 7.46  | -8.33 |
| Ppp1r3a        | 8.75  | 5.69  | -8.34 |
| Sp110          | 9.61  | 6.55  | -8.35 |
|                | 11.40 | 8.33  | -8.40 |
| Armcx3         | 8.71  | 5.64  | -8.43 |
| Pcdh11x        | 9.07  | 5.99  | -8.45 |
| Sp110          | 9.63  | 6.55  | -8.45 |
| H2-Q6 LOC68395 | 12.76 | 9.67  | -8.49 |
| Hmcn1          | 8.83  | 5.75  | -8.49 |
| Fn1            | 13.19 | 10.10 | -8.50 |
| Pkhd11l        | 8.84  | 5.74  | -8.55 |
| Fetub          | 10.54 | 7.44  | -8.55 |
| Dpysl3         | 9.96  | 6.86  | -8.58 |
| Pxmp4          | 9.86  | 6.76  | -8.60 |
| Clic5          | 9.77  | 6.66  | -8.62 |
| Renbp          | 11.89 | 8.78  | -8.64 |
| Enpp4          | 9.48  | 6.36  | -8.67 |
| Cxcl13         | 9.01  | 5.89  | -8.68 |
| D14Erttd668e   | 9.89  | 6.77  | -8.69 |
| Prrx1          | 9.56  | 6.44  | -8.71 |
| Parvb          | 9.70  | 6.58  | -8.72 |
| Heg1           | 10.30 | 7.18  | -8.73 |
| Irak3          | 9.79  | 6.66  | -8.75 |
| Idh2           | 10.52 | 7.39  | -8.76 |
| Zeb1           | 9.74  | 6.61  | -8.77 |
| Ddx60          | 8.92  | 5.78  | -8.78 |
| Herc5          | 9.70  | 6.56  | -8.81 |
| Ifit3          | 12.21 | 9.07  | -8.84 |
| 9430020K01Rik  | 12.24 | 9.09  | -8.87 |
| Akap12         | 10.17 | 7.02  | -8.90 |
| Atoh8          | 10.42 | 7.27  | -8.91 |
| Gbp6           | 10.53 | 7.36  | -8.99 |

|                     |       |      |        |
|---------------------|-------|------|--------|
| Zdhhc15             | 9.20  | 6.03 | -9.01  |
| Clca1               | 9.07  | 5.88 | -9.13  |
| Rspo3               | 9.87  | 6.68 | -9.13  |
| Plcb4               | 9.77  | 6.58 | -9.14  |
| Raet1d Raet1e Raet1 |       |      |        |
| b                   | 9.82  | 6.62 | -9.18  |
| Mmp2                | 10.82 | 7.61 | -9.26  |
| Fbn1 Gm9913         | 9.72  | 6.51 | -9.27  |
| Ildr2               | 9.91  | 6.69 | -9.27  |
| ligp1               | 8.69  | 5.47 | -9.30  |
|                     | 11.56 | 8.34 | -9.31  |
| Cbr3                | 9.26  | 6.03 | -9.33  |
| Ttc28               | 9.75  | 6.52 | -9.35  |
| Mpa2l Gbp10 EG6346  |       |      |        |
| 50 Gbp8             | 9.46  | 6.23 | -9.38  |
| Ifit1               | 10.87 | 7.63 | -9.41  |
| Fabp4               | 9.70  | 6.47 | -9.42  |
| Slc10a6             | 9.84  | 6.59 | -9.46  |
| Olfml3              | 10.19 | 6.94 | -9.48  |
| Gpr133              | 9.97  | 6.72 | -9.56  |
| Scn3b               | 9.75  | 6.50 | -9.57  |
| Spon1               | 10.34 | 7.08 | -9.57  |
| Aldh2               | 10.13 | 6.87 | -9.61  |
| Grb10               | 9.75  | 6.48 | -9.63  |
| Gm8995              | 9.29  | 6.02 | -9.64  |
| Rin3                | 11.00 | 7.73 | -9.66  |
| Prep                | 10.07 | 6.79 | -9.67  |
| Copz2               | 10.11 | 6.83 | -9.72  |
| Zcchc24             | 9.64  | 6.35 | -9.75  |
| S100a4              | 11.39 | 8.11 | -9.76  |
| P2rx7               | 10.53 | 7.24 | -9.82  |
| Apcdd1              | 10.58 | 7.28 | -9.83  |
| Capn6               | 9.73  | 6.43 | -9.84  |
| Al451617            | 8.81  | 5.49 | -9.93  |
|                     | 11.84 | 8.52 | -9.97  |
| BC023105            | 8.01  | 4.67 | -10.18 |
| P4ha3               | 9.95  | 6.60 | -10.19 |
| Adamts5             | 9.56  | 6.20 | -10.27 |
| Nt5dc2 Stab1        | 12.79 | 9.41 | -10.43 |
| Xaf1                | 10.26 | 6.87 | -10.49 |
| Fam171b             | 9.48  | 6.08 | -10.53 |
| Snta1               | 10.61 | 7.20 | -10.63 |
| Colec12             | 10.34 | 6.92 | -10.67 |
| Pdgrfb              | 9.95  | 6.52 | -10.74 |
| Crip1               | 10.74 | 7.30 | -10.80 |
| C1rb C1ra           | 10.85 | 7.41 | -10.83 |
| Lix1l               | 10.37 | 6.92 | -10.93 |
| Cmpk2               | 10.23 | 6.78 | -10.95 |
| Thbd                | 10.07 | 6.61 | -10.96 |
| Dhrs9               | 10.73 | 7.27 | -10.97 |
| Aldh1a1             | 13.20 | 9.72 | -11.13 |
| B4galt5             | 11.39 | 7.90 | -11.17 |
| Zbp1                | 10.88 | 7.38 | -11.36 |
| St3gal5             | 10.11 | 6.59 | -11.47 |
| S100a1              | 12.28 | 8.76 | -11.48 |



|              |       |      |        |
|--------------|-------|------|--------|
| Gbp3         | 10.12 | 6.56 | -11.82 |
| Osr1         | 10.62 | 7.05 | -11.87 |
| Finc         | 10.39 | 6.80 | -12.08 |
| Creb3l1      | 10.24 | 6.64 | -12.09 |
| Slc29a1      | 11.10 | 7.49 | -12.17 |
| Prr5l        | 9.21  | 5.60 | -12.21 |
| Nxph1        | 10.19 | 6.57 | -12.26 |
| Ccdc80       | 9.60  | 5.99 | -12.26 |
| Cfh          | 9.02  | 5.41 | -12.26 |
| Ctla2b       | 9.88  | 6.26 | -12.30 |
| Tenc1        | 10.99 | 7.37 | -12.30 |
| Oas1b        | 10.80 | 7.18 | -12.30 |
| Serpinh1     | 10.77 | 7.11 | -12.64 |
| Slc7a2       | 10.00 | 6.34 | -12.65 |
| Timp1        | 12.27 | 8.60 | -12.73 |
| Dock10       | 9.65  | 5.96 | -12.91 |
| Gpm6a        | 9.49  | 5.80 | -12.92 |
| Armcx3       | 9.53  | 5.83 | -13.01 |
| Glp1r        | 10.09 | 6.39 | -13.08 |
| Tgfbr3       | 10.59 | 6.87 | -13.14 |
| Cd109        | 11.92 | 8.20 | -13.16 |
| Oas1a        | 10.75 | 7.03 | -13.17 |
| Ms4a4c       | 8.95  | 5.23 | -13.20 |
| Fam5c        | 9.74  | 6.02 | -13.22 |
| Layn         | 10.16 | 6.43 | -13.28 |
| C1s          | 9.68  | 5.94 | -13.38 |
| Scgb1a1      | 9.70  | 5.95 | -13.52 |
| Oasl1        | 11.01 | 7.25 | -13.57 |
| C2           | 10.02 | 6.25 | -13.63 |
| Gm8979 Gvin1 | 9.01  | 5.24 | -13.67 |
| Adh1         | 10.11 | 6.33 | -13.78 |
| Disp1        | 11.11 | 7.31 | -13.92 |

9930111J21Rik2|9930

|                   |       |      |        |
|-------------------|-------|------|--------|
| 111J21Rik1 Gm5431 | 11.06 | 7.25 | -14.07 |
| Dzip1             | 9.96  | 6.14 | -14.08 |
| Pros1             | 10.61 | 6.79 | -14.11 |
| Hpse              | 10.22 | 6.39 | -14.21 |

9930111J21Rik2|9930

|                   |       |      |        |
|-------------------|-------|------|--------|
| 111J21Rik1 Gm5431 | 11.07 | 7.23 | -14.36 |
| Dhx58             | 11.07 | 7.19 | -14.77 |
| Ly6f              | 11.20 | 7.31 | -14.77 |
| Fmo3              | 10.43 | 6.54 | -14.91 |
| Ear1              | 8.99  | 5.07 | -15.09 |
| Fgfr1             | 11.20 | 7.27 | -15.18 |
| Rtp4              | 11.04 | 7.10 | -15.45 |
| Des               | 10.58 | 6.63 | -15.46 |
| Hsd17b11          | 9.97  | 6.00 | -15.64 |
| Srgn              | 10.13 | 6.15 | -15.76 |
| Irf7              | 11.71 | 7.72 | -15.93 |
| Pgcp              | 10.28 | 6.26 | -16.28 |
| Kdr               | 10.13 | 6.10 | -16.31 |
| Pcolce            | 12.95 | 8.92 | -16.36 |
| Sp100             | 10.72 | 6.68 | -16.48 |

|                    |       |      |        |
|--------------------|-------|------|--------|
| Fhl1               | 11.05 | 7.00 | -16.52 |
| Cxcl10             | 11.56 | 7.49 | -16.77 |
| Nnmt               | 11.11 | 7.04 | -16.78 |
| Nkain4             | 11.45 | 7.36 | -16.99 |
| Gpr116             | 10.12 | 6.02 | -17.07 |
| Cpt1c              | 10.97 | 6.87 | -17.13 |
| Vcam1              | 10.61 | 6.51 | -17.15 |
| Trim30             | 11.23 | 7.12 | -17.20 |
| Prrg3              | 10.51 | 6.39 | -17.38 |
| Klra17             | 9.31  | 5.18 | -17.44 |
| Tmtc1              | 10.70 | 6.54 | -17.82 |
| Apol9b Apol9a      | 11.59 | 7.42 | -17.92 |
| Tmem119            | 11.23 | 7.01 | -18.55 |
| Prune2             | 11.11 | 6.87 | -18.87 |
| Agtrap             | 11.18 | 6.93 | -19.00 |
| Csprs Gm7609 Gm75  |       |      |        |
| 82                 | 12.13 | 7.85 | -19.38 |
| Gvin1              | 10.97 | 6.65 | -19.97 |
| Cpz                | 11.35 | 6.99 | -20.48 |
| Rnf128             | 11.16 | 6.81 | -20.49 |
| Cyba               | 11.96 | 7.57 | -20.97 |
| Csprs Gm7609 Gm75  |       |      |        |
| 82                 | 11.20 | 6.79 | -21.21 |
| Prkcdbp            | 12.45 | 8.02 | -21.51 |
| Tmem173            | 11.08 | 6.66 | -21.53 |
| Tbx20              | 10.15 | 5.71 | -21.77 |
| Saa3               | 10.88 | 6.43 | -21.83 |
| Heg1               | 11.29 | 6.83 | -21.94 |
| Adcyap1r1          | 11.21 | 6.75 | -21.99 |
| Klhl22             | 11.05 | 6.59 | -22.05 |
| Apol9a Apol9b      | 11.93 | 7.44 | -22.33 |
| Bscl2              | 12.44 | 7.95 | -22.47 |
| Fstl1              | 10.73 | 6.23 | -22.52 |
| Csprs Gm7609 Gm75  |       |      |        |
| 82                 | 11.32 | 6.82 | -22.65 |
| Prune2             | 11.20 | 6.68 | -22.91 |
| Gria3              | 9.89  | 5.35 | -23.29 |
| Serpina3m          | 11.41 | 6.87 | -23.37 |
| Gria4              | 10.41 | 5.85 | -23.53 |
| Tgtp1 Tgtp2 Gm1218 |       |      |        |
| 5                  | 10.89 | 6.30 | -24.01 |
| Trem2              | 12.08 | 7.43 | -25.15 |
| Cdh2               | 11.56 | 6.90 | -25.30 |
| Mxra8              | 11.99 | 7.32 | -25.48 |
| Lyve1              | 11.35 | 6.67 | -25.61 |
| Gm7609 Csprs Gm75  |       |      |        |
| 82                 | 11.70 | 7.01 | -25.81 |
| Gm7609 Csprs Gm75  |       |      |        |
| 82                 | 11.74 | 7.03 | -26.18 |
| Tmem45a            | 10.49 | 5.78 | -26.19 |
| Fkbp10 Nt5c3l      | 12.11 | 7.36 | -26.81 |
| Pmp22              | 12.72 | 7.91 | -28.06 |
| Oasl2              | 12.77 | 7.96 | -28.06 |
| Oas1g Oas1a        | 11.86 | 7.03 | -28.47 |
| Oas2               | 11.87 | 7.01 | -29.12 |

|                    |       |      |         |
|--------------------|-------|------|---------|
| Pdpn               | 12.13 | 7.25 | -29.44  |
| Cd97               | 11.58 | 6.69 | -29.84  |
| Sgce               | 11.08 | 6.14 | -30.68  |
| Tgtp1 Tgtp2 Gm1218 |       |      |         |
| 5                  | 11.55 | 6.51 | -32.93  |
| Fam111a            | 10.50 | 5.46 | -33.00  |
| Gda                | 11.40 | 6.22 | -36.10  |
| Ctla2a             | 11.62 | 6.35 | -38.72  |
| Aebp1              | 12.41 | 7.06 | -40.79  |
| Rpp25              | 11.83 | 6.47 | -40.99  |
| Nid1               | 12.06 | 6.61 | -43.60  |
| Scd1               | 11.81 | 6.32 | -44.91  |
| Vcan               | 11.72 | 6.18 | -46.57  |
| Lbp                | 12.63 | 7.08 | -46.97  |
| Lox                | 11.42 | 5.85 | -47.66  |
| Mmp3               | 11.90 | 6.19 | -52.57  |
| Eng                | 12.88 | 7.16 | -52.64  |
| Neto1              | 11.84 | 6.00 | -57.07  |
| Timp3              | 12.23 | 6.31 | -60.63  |
| Folh1              | 11.78 | 5.73 | -66.48  |
| Prg4               | 11.76 | 5.67 | -68.47  |
| Ifi2712a           | 12.87 | 6.64 | -75.20  |
| Gabra3             | 12.59 | 6.32 | -77.10  |
| Dcn                | 12.04 | 5.77 | -77.19  |
| Cd34               | 12.73 | 6.39 | -80.62  |
| Ms4a4d             | 12.08 | 5.70 | -83.39  |
| Slc43a3            | 13.40 | 6.88 | -92.16  |
| Sepp1              | 12.39 | 5.84 | -93.64  |
| Vim                | 13.74 | 7.02 | -105.34 |
| Serpina3n          | 13.56 | 6.57 | -126.97 |
