# Supplementary material
Source: PubMed Central journal article supplement (PMC4200317)
Supplement: tableS2.pdf [file tableS2.pdf]

### ErbB Signaling Pathway

| Gene Symbol  | ImChief<br>Expression<br>Level | ImSPEM<br>Expression<br>Level | Fold Change |
|--------------|--------------------------------|-------------------------------|-------------|
| Plcg2        | 6.70                           | 10.70                         | 15.96       |
| Cblc         | 6.80                           | 10.20                         | 10.58       |
| Erbb3        | 7.67                           | 10.32                         | 6.28        |
| Pak6         | 6.80                           | 9.29                          | 5.58        |
| Pak1         | 7.47                           | 9.87                          | 5.28        |
| Myc          | 10.59                          | 12.22                         | 3.10        |
| Areg         | 7.30                           | 8.91                          | 3.04        |
| Hbegf        | 7.95                           | 9.56                          | 3.04        |
| Nck2         | 8.17                           | 9.67                          | 2.84        |
| Camk2b       | 8.14                           | 9.48                          | 2.53        |
| Braf         | 8.57                           | 9.83                          | 2.39        |
| Erbb2        | 8.68                           | 9.92                          | 2.36        |
| Pik3cb       | 9.13                           | 10.36                         | 2.34        |
| Cdkn1b / p27 | 6.92                           | 8.07                          | 2.21        |
| Tgfa         | 9.05                           | 10.11                         | 2.09        |
| Pik3r3       | 8.28                           | 9.34                          | 2.07        |
| Kras         | 8.59                           | 9.62                          | 2.04        |

## Pathways in Cancer

| Gene Symbol       | ImChief<br>Expression<br>Level | ImSPEM<br>Expression<br>Level | Fold Change |
|-------------------|--------------------------------|-------------------------------|-------------|
| Cdh1              | 6.76                           | 12.44                         | 51.21       |
| Plcg2             | 6.70                           | 10.70                         | 15.96       |
| Lamc2             | 6.86                           | 10.71                         | 14.39       |
| Rac3              | 7.71                           | 11.24                         | 11.57       |
| Wnt7b             | 6.56                           | 10.01                         | 10.91       |
| Cblc              | 6.80                           | 10.20                         | 10.58       |
| Lamb3             | 7.18                           | 10.29                         | 8.63        |
| Wnt7a             | 6.62                           | 9.71                          | 8.51        |
| Runx1 / AML1      | 8.74                           | 11.76                         | 8.09        |
| Wnt10a            | 8.15                           | 10.99                         | 7.15        |
| Lama3             | 6.73                           | 9.37                          | 6.21        |
| Met               | 8.77                           | 11.36                         | 6.01        |
| Itga3             | 9.20                           | 11.63                         | 5.40        |
| Fgf1              | 6.68                           | 8.97                          | 4.90        |
| Igf1r             | 7.85                           | 9.99                          | 4.40        |
| Fgfr2             | 7.01                           | 9.01                          | 4.01        |
| Cebpa             | 7.25                           | 9.24                          | 3.97        |
| Cdk6              | 8.56                           | 10.55                         | 3.96        |
| Itga6             | 9.18                           | 11.13                         | 3.87        |
| Wnt4              | 8.93                           | 10.87                         | 3.84        |
| Tgfb2             | 8.64                           | 10.52                         | 3.69        |
| Myc               | 10.59                          | 12.22                         | 3.10        |
| Lama5             | 9.15                           | 10.77                         | 3.08        |
| Ptgs2 / Cox2      | 9.28                           | 10.87                         | 3.01        |
| Bid               | 9.14                           | 10.69                         | 2.92        |
| Jup               | 11.66                          | 13.20                         | 2.91        |
| Ralgds            | 7.67                           | 9.17                          | 2.82        |
| Mitf              | 6.69                           | 8.13                          | 2.73        |
| Mecom / Evi1      | 6.63                           | 8.05                          | 2.69        |
| Dapk2             | 6.91                           | 8.33                          | 2.68        |
| Pdgfa             | 10.14                          | 11.53                         | 2.62        |
| Birc3             | 8.19                           | 9.53                          | 2.54        |
| Cdkn2b / p15INK4b | 9.43                           | 10.73                         | 2.47        |
| Fh1               | 9.49                           | 10.78                         | 2.44        |
| Braf              | 8.57                           | 9.83                          | 2.39        |
| ErbB2             | 8.68                           | 9.92                          | 2.36        |
| Pik3cb            | 9.13                           | 10.36                         | 2.34        |
| Pdgfb             | 7.76                           | 8.96                          | 2.30        |
| Ralb              | 9.52                           | 10.71                         | 2.27        |
| Cul2              | 8.93                           | 10.09                         | 2.23        |
| Cdkn1b / p27      | 6.92                           | 8.07                          | 2.21        |

|                |       |       |      |
|----------------|-------|-------|------|
| Bmp2           | 5.59  | 6.69  | 2.15 |
| Slc2a1 / Glut1 | 11.66 | 12.74 | 2.12 |
| Tgfa           | 9.05  | 10.11 | 2.09 |
| Egln3          | 10.23 | 11.29 | 2.07 |
| Pik3r3         | 8.28  | 9.34  | 2.07 |
| Max            | 9.91  | 10.96 | 2.07 |
| Kras           | 8.59  | 9.62  | 2.04 |
